# Supplementary material for: Variations in length of stay among surviving preterm infants admitted to neonatal intensive care units in Shenzhen, China
Source: PeerJ. 2025 Dec 8;13:e20344. doi: 10.7717/peerj.20344 (PMC12697294; doi:10.7717/peerj.20344)
Supplement: Supplemental Information 1 [file peerj-13-20344-s001.xlsx]

## Sheet: Sheet1
gender(1:Male;0:Female)	Gestational age (weeks)	Gestational age (days)	gestational age at birth (weeks)	birth weight(g）	Length of stay(d)	Discharge for correction of gestational age(weeks)	multiple birth(1: Yes; 0: No)	inborn(1: Yes; 0: No)	SGA(1: Yes; 0: No)	1-minute Apgar scores ≤ 7(1: Yes; 0: No)	5-minute Apgar scores ≤ 7(1: Yes; 0: No)	surfactant use(1: Yes; 0: No)	hospitalization costs（RMB）	IVH grade III and above or cPVL(1: Yes; 0: No)	NEC ≥ stage II(1: Yes; 0: No)	BPD(1: Yes; 0: No)	Severe ROP(1: Yes; 0: No)	nosocomial infection(1: Yes; 0: No)	Sepsis(1: Yes; 0: No)	EUGR(1: Yes; 0: No)	Maternal age(y)	Primigravida(1: Yes; 0: No)	Maternal hypertension(1: Yes; 0: No)	Maternal diabetes(1: Yes; 0: No)	GBS infection(1: Yes; 0: No)	Antenatal corticosteroids(1: Yes; 0: No)	cesarean section(1: Yes; 0: No)	PROM≥ 18 hours(1: Yes; 0: No)
1	24	6	24.8571	720	119	41.8571	0	1	0	1	1	1	319607	0	0	1	0	0	0	1	30	1	0	0	0	1	0	0
1	24	6	24.8571	700	103	39.5714	1	1	0	1	0	1	196295	0	0	1	0	1	1	0	27	1	0	0	0	1	0	0
0	24	6	24.8571	590	103	39.5714	1	1	0	0	0	1	231140	0	0	1	1	1	0	0	27	1	0	0	0	1	0	0
0	25	5	25.7143	790	89	38.4286	0	1	0	1	0	1	133384	0	0	0	0	0	1	1	36	1	0	0		1	0	0
0	25	5	25.7143	730	138	45.7143	1	1	0			0	209047	1	0	1	0	1	0	0	40	0	0	0	0	1	0	0
0	26	3	26.4286	900	83	38.2857	0	1	0	1	1	1	146530	0	0	1	0	1	0	1	40	0	0	0	0	1	0	1
0	26	2	26.2857	830	82	38	1	1	0	0	0	1	127576	0	0	1	0	1	0	0	37	1	0	1	0	1	0	1
0	26	2	26.2857	930	73	36.7143	1	1	0	0	0	1	103577	0	0	1	0	1	0	0	37	1	0	1	0	1	0	1
1	26	5	26.7143	950	68	36.4286	1	1	0	0	0	0	95855.7	0	0	1	0	1	0	0	31	1	0	0	0	1	0	0
0	26	5	26.7143	900	76	37.5714	1	1	0	1	1	0	120064	0	0	1	0	1	1	0	31	1	0	0	0	1	0	0
0	26	6	26.8571	920	72	37.1429	1	1	0	0	0	1	117329	0	0	0	0	1	0	0	26	1	0	0	0	1	1	0
0	27	4	27.5714	1190	71	37.7143	0	1	0	0	0	1	67251.8	0	0	0	0	0	0	0	33	0	0	0	0	1	1	0
1	27	3	27.4286	1040	81	39	0	1	0	1	0	0	138650	0	0	1	0	0	0	0	29	1	0	0	1	1	0	1
1	27	6	27.8571	1290	58	36.1429	1	1	0	1	0	1	125210	0	0	1	0	0	0	0	34	0	0	1	0	1	1	1
1	27	6	27.8571	1320	58	36.1429	1	1	0	1	1	1	117793	0	0	1	0	0	0	0	34	0	0	1	0	1	1	1
1	27	2	27.2857	1000	77	38.2857	0	1	0	1	0	1	115168	0	0	1	0	0	0	1	25	1	0	0	0	1	0	0
1	27	4	27.5714	1200	77	38.5714	0	1	0	0	0	1	142372	0	0	1	0	0	0	0	33	0	0	0	0	1	1	1
0	27	3	27.4286	920	71	37.5714	0	1	0	0	0	0	91925	0	0	1	0	0	1	0	31	1	0	0		1	0	0
1	27	6	27.8571	1120	60	36.4286	0	1	0	0	0	1	92784.9	0	0	0	0	0	0	0	27	0	0	0	0	1	0	0
1	27	3	27.4286	990	65	36.7143	0	1	0	1	1	1	88900	0	0	0	0	0	0	0	42	1	1	0		1	1	0
0	27	5	27.7143	1100	65	37	1	1	0	0	0	1	99742.9	0	0	1	0	0	0	0	30	1	0	0	1	1	0	0
1	27	5	27.7143	1100	68	37.4286	1	1	0	0	0	1	114892	0	0	1	0	0	0	0	30	0	0	0	1	1	1	0
1	27	3	27.4286	950	59	35.8571	1	1	0	1	0	1	117749	0	0	1	0	0	0	0	28	1	0	0		1	1	0
0	27	3	27.4286	670	88	40	1	1	0	1	0	1	170860	0	0	1	0	0	1	0	28	1	0	0		1	1	0
0	28	2	28.2857	1040	57	36.4286	1	1	0	1	0	1	104991	0	0	0	0	0	0	0	32	1	0	0	0	1	1	0
0	28	2	28.2857	1190	76	39.1429	1	1	0	1	0	1	101449	0	0	0	0	0	0	0	32	1	0	0	0	1	1	0
0	28	0	28	990	88	40.5714	0	1	0	0	0	1	146070	0	0	1	0	1	1	0	31	1	0	0	0	1	1	0
0	28	5	28.7143	1310	63	37.7143	0	1	0	1	0	0	85987.5	0	0	0	0	1	1	0	37	0	0	1	0	1	1	0
0	28	4	28.5714	1180	63	37.5714	0	1	0	0	0	0	79403.3	0	0	1	0	0	0	0	37	1	0	0		1	1	1
0	28	1	28.1429	1150	71	38.2857	1	1	0	0	0	1	94156.5	0	0	1	0	0	0	0	28	1	0	0		1	1	0
1	28	1	28.1429	1160	71	38.2857	1	1	0	0	0	1	107025	0	0	1	0	0	0	0	28	1	0	0		1	1	0
1	28	0	28	780	80	39.4286	0	1	1	1	0	1	134324	0	0	1	0	0	0	1	38	1	1	0		1	1	0
0	29	5	29.7143	1550	48	36.5714	0	1	0	0	0	0	53503.6	0	0	0	0	1	0	0	33	0	0	0	0	1	1	0
0	29	3	29.4286	1380	46	36	0	1	0	0	0	1	72540.8	0	0	0	0	1	0	0	21	1	0	0	0	1	1	0
0	29	1	29.1429	1260	54	36.8571	0	1	0	0	0	0	66835.6	0	0	0	0	0	0	0	22	1	0	0		1	0	0
1	29	6	29.8571	1130	58	38.1429	0	1	0	0	0	0	77601.9	0	0	0	0	0	0	0	39	1	1	0		1	1	0
1	29	4	29.5714	1300	59	38	0	1	0	0	0	0	56226.8	0	0	0	0	0	0	0	28	0	0	0		1	0	0
1	29	3	29.4286	1490	49	36.4286	0	1	0	1	0	1	81349.2	0	0	0	0	1	0	0	33	1	0	0	0	1	0	0
0	29	0	29	950	79	40.2857	0	1	0	1	0	1	148761	0	0	1	0	0	0	0	30	1	1	1	0	1	1	0
1	29	0	29	1300	65	38.2857	0	1	0	0	0	0	90444.2	0	0	0	0	0	0	0	31	1	0	1	1	1	0	1
0	29	2	29.2857	1350	50	36.4286	0	1	0	0	0	0	69419.6	0	0	0	0	0	0	0	31	1	0	0	0	1	1	1
1	29	1	29.1429	1340	52	36.5714	0	1	0	0	0	1	81698.1	0	0	0	0	0	1	0	33	1	0	1		1	1	0
1	29	3	29.4286	1100	64	38.5714	0	1	0	0	0	0	102295	0	1	0	0	0	1	1	24	1	0	0	0	1	1	0
0	30	1	30.1429	868	59	38.5714	0	1	1	0	0	0	67226.9	0	0	0	0	0	0	1	33	0	1	0		1	1	0
1	30	2	30.2857	1080	64	39.4286	0	1	0	0	0	0	107015	0	1	0	0	0	1	1	29	0	1	0		1	1	0
0	30	1	30.1429	1135	54	37.8571	0	1	0	0	0	1	66354.1	0	0	0	0	0	0	1	42	0	1	1		1	1	0
1	30	4	30.5714	1480	43	36.7143	1	1	0	0	0	0	54921	0	0	0	0	0	0	0	21	0	0	0	0	1	1	0
0	30	0	30	990	58	38.2857	0	1	0	0	0	0	72442.4	0	0	0	0	0	0	1	32	1	1	0		1	1	0
1	30	6	30.8571	1080	54	38.5714	0	1	1	0	0	0	54896.7	0	0	0	0	0	0	1	29	1	0	0	0	1	1	0
1	31	0	31	1450	51	38.2857	1	1	0	1	0	1	90085.5	0	0	0	0	0	0	1	30	1	0	0	0	1	1	0
0	31	0	31	1270	51	38.2857	1	1	0	0	0	1	61669	0	0	0	0	0	0	1	30	1	0	0	0	1	1	0
0	31	2	31.2857	1110	56	39.2857	0	1	0	1	0	1	91361.6	0	0	0	0	0	0	1	33	0	0	0		0	1	0
1	31	3	31.4286	1220	65	40.7143	0	1	1	0	0	0	74921.9	0	0	0	0	0	0	1	24	0	1	0		1	1	0
1	31	1	31.1429	1850	34	36	0	1	0	0	0	0	41102	0	0	0	0	0	0	0	38	0	0	1	1	1	0	0
1	31	4	31.5714	1420	52	39	0	1	0	0	0	0	62214.4	0	0	0	0	0	0	0	31	0	1	0		1	1	0
1	31	3	31.4286	1670	47	38.1429	1	1	0	0	0	1	67772	0	0	0	0	0	0	0	39	1	0	1	0	1	1	1
1	31	3	31.4286	1510	52	38.8571	1	1	0	0	0	0	52089.7	0	0	0	0	0	0	0	39	1	0	1	0	1	1	1
0	31	6	31.8571	1380	38	37.2857	0	1	0	0	0	0	42651.9	0	0	0	0	0	0	0	34	0	1	0		1	1	0
0	31	6	31.8571	1200	42	37.8571	0	1	1	0	0	0	44281.5	0	0	0	0	0	0	0	26	0	1	0		1	1	0
1	31	3	31.4286	1650	38	36.8571	0	1	0	0	0	0	59409	0	0	0	0	0	1	0	36	1	1	0		1	1	0
0	31	1	31.1429	1500	34	36	0	1	0	0	0	0	38232.3	0	0	0	0	0	0	0	31	0	0	0	0	1	0	0
0	31	5	31.7143	1780	29	35.8571	0	1	0	0	0	1	40666.6	0	0	0	0	0	0	0	34	0	0	0		1	1	0
0	32	5	32.7143	1600	39	38.2857	1	1	0	0	0	0	35707.1	0	0	0	0	0	0	1	29	1	0	1	0	1	1	0
0	32	5	32.7143	1800	32	37.2857	1	1	0	0	0	0	21805.1	0	0	0	0	0	0	0	29	1	0	1	0	1	1	0
1	32	2	32.2857	2150	27	36.1429	0	1	0	0	0	0	19411.8	0	0	0	0	0	0	0	30	1	0	0	0	1	1	1
0	32	2	32.2857	1590	35	37.2857	1	1	0	0	0	0	34249.2	0	0	0	0	0	0	1	35	1	0	1		1	1	0
0	32	2	32.2857	1370	53	39.8571	1	1	0	1	0	0	59747.3	0	0	0	0	0	0	1	35	1	0	1		1	1	0
0	32	2	32.2857	1700	29	36.4286	1	1	0	0	0	0	34345.4	0	0	0	0	0	0	0	30	1	1	0	0	1	1	0
0	32	2	32.2857	1500	38	37.7143	1	1	0	0	0	0	43424.2	0	0	0	0	0	0	0	30	1	1	0	0	1	1	0
1	32	0	32	1760	31	36.4286	0	1	0	0	0	0	41053.8	0	0	0	0	0	0	0	29	1	0	1	0	1	0	0
1	32	5	32.7143	1860	24	36.1429	0	1	0	0	0	0	31266.2	0	0	0	0	0	0	0	37	1	0	0	0	1	1	1
1	32	1	32.1429	2020	22	35.2857	1	1	0	0	0	0	22893.5	0	0	0	0	0	0	0	33	1	0	0	0	1	0	0
0	32	1	32.1429	1780	29	36.2857	1	1	0	0	0	0	31039.3	0	0	0	0	0	0	0	33	1	0	0	0	1	0	0
0	32	3	32.4286	1860	25	36	0	1	0	1	0	0	27578.3	0	0	0	0	0	0	0	29	1	0	0	0	1	1	1
1	32	5	32.7143	1390	39	38.2857	0	1	1	0	0	0	53160.5	0	0	0	0	0	0	0	28	1	0	0		1	1	0
1	32	6	32.8571	2250	20	35.7143	0	1	0	0	0	0	23345	0	0	0	0	0	0	0	19	0	0	0	0	1	0	0
1	32	5	32.7143	1540	49	39.7143	1	1	0	0	0	0	60671.6	0	0	0	0	1	0	0	31	1	0	0		1	1	0
0	32	1	32.1429	1970	34	37	0	1	0	0	0	1	40305.4	0	0	0	0	0	0	0	29	1	0	0	0	1	1	0
1	32	5	32.7143	1710	24	36.1429	0	1	0	0	0	1	38168.3	0	0	0	0	0	0	0	36	0	1	0		1	1	0
1	32	0	32	1700	28	36	0	1	0	0	0	1	42216	0	0	0	0	0	0	0	23	0	0	0	0	1	1	0
1	32	5	32.7143	2350	26	36.4286	0	1	0	0	0	1	43078	0	0	0	0	0	0	0	38	1	0	1		0	1	0
1	32	4	32.5714	1980	24	36	0	1	0	0	0	0	25001.2	0	0	0	0	0	0	0	33	0	0	0	0	1	0	1
1	32	5	32.7143	1830	27	36.5714	1	1	0	0	0	1	30533.8	0	0	0	0	0	0	0	35	1	0	0		1	1	0
0	32	5	32.7143	1380	40	38.4286	1	1	0	0	0	1	38725.6	0	0	0	0	0	0	1	35	1	0	0		1	1	0
1	32	0	32	1785	38	37.4286	0	1	0	0	0	0	36445.9	0	0	0	0	0	0	0	27	1	0	0	0	1	1	1
1	32	4	32.5714	1900	24	36	0	1	0	0	0	0	19463.5	0	0	0	0	0	0	0	31	1	0	0	1	1	1	1
0	32	5	32.7143	1850	23	36	0	1	0	0	0	0	19485.5	0	0	0	0	0	0	0	36	0	0	0	0	1	1	1
0	32	2	32.2857	1100	65	41.5714	0	1	1	0	0	0	55745.7	0	0	0	0	1	0	1	31	1	1	0		1	1	0
0	32	6	32.8571	1380	37	38.1429	0	1	1	0	0	1	47495.3	0	0	0	0	0	0	1	31	1	1	0		1	1	0
0	32	6	32.8571	1700	30	37.1429	0	1	0	0	0	0	30371	0	0	0	0	0	0	0	41	1	1	0		1	1	0
0	32	3	32.4286	2100	26	36.1429	0	1	0	0	0	1	32122.4	0	0	0	0	0	0	0	38	0	0	0	0	1	1	0
0	32	4	32.5714	2200	22	35.7143	0	1	0	0	0	0	16859.7	0	0	0	0	0	0	0	35	0	0	0	0	1	0	0
1	33	2	33.2857	2150	16	35.5714	0	1	0	0	0	0	16141.7	1	0	0	0	0	0	0	26	1	0	0	0	1	0	0
1	33	0	33	2100	21	36	0	1	0	0	0	0	16056.8	0	0	0	0	0	0	0	27	1	0	0	0	1	1	1
0	33	1	33.1429	2470	21	36.1429	0	1	0	0	0	0	13923.6	0	0	0		0	0	0	41	0	0	0		1	1	0
1	33	3	33.4286	2350	20	36.2857	1	1	0	0	0	0	16337.3	0	0	0	0	0	0	0	31	1	1	0	0	1	1	0
1	33	3	33.4286	1750	23	36.7143	1	1	0	0	0	0	21862.6	0	0	0	0	0	0	0	31	1	1	0	0	1	1	0
0	33	5	33.7143	1875	16	36	1	1	0	0	0	0	12761.6	0	0	0	0	0	0	0	31	0	0	0	0	0	1	0
0	33	5	33.7143	2100	24	37.1429	1	1	0	0	0	0	24708	0	0	0	0	0	0	0	31	0	0	0	0	0	1	0
1	33	0	33	1650	27	36.8571	0	1	0	0	0	0	26827.7	0	0	0	0	0	0	1	36	1	0	0	0	1	1	1
0	33	1	33.1429	1380	35	38.1429	0	1	1	0	0	0	35153.1	1	0	0	0	0	0	0	29	1	0	0		0	0	0
0	33	2	33.2857	1940	20	36.1429	0	1	0	0	0	0	18184.2	0	0	0	0	0	0	0	32	0	0	0	0	1	0	0
0	33	4	33.5714	1700	24	37	0	1	0	0	0	0	22901.9	0	0	0	0	0	0	0	36	0	0	0		1	1	0
1	33	4	33.5714	2270	24	37	0	1	0	0	0	1	36198.4	0	0	0	0	0	0	0	33	0	0	1	0	1	1	1
0	33	2	33.2857	2100	23	36.5714	0	1	0	0	0	0	21764.1	0	0	0	0	0	0	0	43	1	1	0		1	1	0
0	33	6	33.8571	1760	29	38	0	1	0	0	0	0	27100.7	0	0	0	0	0	0	0	28	0	0	1	0	1	0	0
1	33	5	33.7143	2480	19	36.4286	0	1	0	0	0	0	17869.5	0	0	0	0	0	0	0	31	1	0	0	0	1	0	0
0	33	4	33.5714	1980	26	37.2857	1	1	0	0	0	0	31190.5	0	0	0	0	0	0	0	30	1	1	1	0	1	1	0
0	33	4	33.5714	2150	23	36.8571	1	1	0	0	0	0	21765.8	0	0	0	0	0	0	0	30	1	1	1	0	1	1	0
0	33	6	33.8571	2140	15	36	0	1	0	0	0	0	13014.9	0	0	0	0	0	0	0	26	1	0	0	0	1	1	1
0	33	0	33	2030	22	36.1429	1	1	0	0	0	0	24414.3	0	0	0	0	0	0	0	26	1	1	1		1	1	0
0	33	0	33	1950	22	36.1429	1	1	0	0	0	0	23906.1	0	0	0	0	0	0	0	26	1	1	1		1	1	0
0	33	6	33.8571	1840	28	38	0	1	0	0	0	0	58546.2	0	0	0	0	0	1	0	37	0	0	0	0	1	1	0
1	33	0	33	2120	28	37	1	1	0	0	0	0	29454.7	0	0	0	0	0	0	0	31	0	0	1	0	1	1	0
0	33	0	33	1930	28	37	1	1	0	0	0	0	34934.4	0	0	0	0	0	0	0	31	0	0	1	0	1	1	0
0	33	4	33.5714	1700	29	37.7143	0	1	0	0	0	0	28588	0	0	0	0	0	0	0	29	1	1	0	0	1	1	0
0	33	6	33.8571	1800	27	37.7143	0	1	0	0	0	0	30476.9	0	0	0	0	0	0	1	41	0	0	0	1	1	1	0
0	33	0	33	1920	21	36	0	1	0	0	0	0	17486	0	0	0	0	0	0	0	33	1	0	0		1	1	1
1	33	0	33	1990	22	36.1429	1	1	0	0	0	0	21133.1	0	0	0	0	0	0	0	24	1	0	0	0	1	1	0
1	33	1	33.1429	1800	27	37	1	1	0	0	0	0	21891.3	0	0	0	0	0	0	0	44	0	0	0	0	1	1	0
1	33	1	33.1429	1700	27	37	1	1	0	0	0	0	22063.9	0	0	0	0	0	0	0	44	0	0	0	0	1	1	0
0	33	5	33.7143	1420	40	39.4286	0	1	1	0	0	0	38039.8	0	0	0	0	0	0	1	28	1	0	1	0	1	1	1
1	33	4	33.5714	1820	27	37.4286	0	1	0	0	0	0	22644.8	0	0	0	0	0	0	0	28	1	0	0	0	1	1	0
0	33	6	33.8571	2380	14	35.8571	0	1	0	0	0	0	13152.8	0	0	0	0	0	0	0	28	1	0	0		1	1	0
1	33	1	33.1429	1970	25	36.7143	0	1	0	0	0	0	30070.5	0	0	0	0	0	0	0	32	1	0	0	0	1	1	0
1	33	5	33.7143	2230	13	35.5714	0	1	0	0	0	0	9536.09	0	0	0	0	0	0	0	41	1	0	0		1	1	0
0	34	2	34.2857	2160	23	37.5714	1	1	0	0	0	0	16161	0	0	0	0	0	0	0	43	0	0	0	0	1	1	0
1	34	2	34.2857	1960	23	37.5714	1	1	0	0	0	0	16208.9	0	0	0	0	0	0	0	43	0	0	0	0	1	1	0
0	34	3	34.4286	2220	14	36.4286	0	1	0	0	0	0	13944	0	0	0	0	0	0	0	27	1	0	0	0	0	1	0
1	34	4	34.5714	2400	10	36	0	1	0	0	0	0	7320.65	0	0	0		0	0	0	27	0	0	0	0	0	0	0
1	34	0	34	2900	19	36.7143	0	1	0	0	0	0	14369	0	0	0	0	0	0	0	38	0	0	0	1	1	1	0
1	34	6	34.8571	2360	10	36.2857	0	1	0	0	0	0	9189.82	0	0	0	0	0	0	0	28	1	0	0		0	1	0
1	34	0	34	2000	15	36.2857	0	1	0	0	0	0	13073.2	0	0	0		0	0	0	32	0	0	0	0	1	0	0
1	34	3	34.4286	1900	15	36.5714	0	1	0	0	0	0	11902.4	0	0	0	0	0	0	0	34	0	1	0	0	1	1	0
0	34	1	34.1429	1900	20	37	0	1	0	0	0	0	21196.5	0	0	0	0	0	0	0	31	1	1	0	1	1	0	0
0	34	0	34	1880	41	39.8571	0	1	0	0	0	0	46937.8	0	0	0	0	0	0	0	29	0	1	1		1	1	0
0	34	6	34.8571	2280	10	36.2857	0	1	0	0	0	0	8987.92	0	0	0	0	0	0	0	25	1	1	1		0	1	0
0	34	0	34	2400	15	36.1429	0	1	0	0	0	0	12454.5	0	0	0		0	0	0	38	0	0	1	0	1	0	1
0	34	1	34.1429	2690	13	36	0	1	0	1	1	0	11638	0	0	0	0	0	0	0	31	1	0	1	0	1	0	1
0	34	0	34	1880	22	37.1429	0	1	0	0	0	0	18208	0	0	0	0	0	0	0	31	1	1	0		1	1	0
1	34	2	34.2857	2500	21	37.2857	0	1	0	0	0	0	43686.9	0	0	0	0	0	0	0	39	0	0	1	1	1	1	1
1	34	2	34.2857	2800	10	35.7143	0	1	0	0	0	0	10219.5	0	0	0	0	0	0	0	29	1	0	0	0	1	0	1
0	34	0	34	2100	20	36.8571	0	1	0	0	0	0	17593.6	0	0	0	0	0	0	0	37	0	0	0	0	1	0	1
1	34	2	34.2857	2700	18	36.8571	0	1	0	0	0	0	29801	0	0	0	0	0	1	0	35	1	0	1	0	1	0	1
0	34	6	34.8571	2150	15	37	1	1	0	0	0	0	11713.3	0	0	0	0	0	0	0	33	0	0	0	0	1	1	0
1	34	6	34.8571	2650	9	36.1429	1	1	0	0	0	0	7915.95	0	0	0		0	0	0	33	0	0	0	0	1	1	0
0	34	5	34.7143	2340	16	37	0	1	0	0	0	0	11132.1	0	0	0		0	0	0	33	0	0	1	0	1	0	0
1	34	0	34	2750	17	36.4286	1	1	0	0	0	0	14827.5	0	0	0	0	0	0	0	32	1	0	0	0	1	1	0
1	34	1	34.1429	2200	13	36	0	1	0	0	0	0	17106.6	0	0	0		0	0	0	34	1	0	0	0	0	1	0
1	34	0	34	2100	16	36.2857	0	1	0	0	0	0	13202.9	0	0	0		0	0	0	31	1	0	0	0	1	0	1
1	34	2	34.2857	1980	21	37.2857	0	1	1	0	0	1	35498.3	0	0	0	0	0	0	1	31	0	0	0	0	1	1	0
0	34	0	34	2250	17	36.4286	0	1	0	0	0	0	13733.2	0	0	0		1	0	0	30	0	0	0	0	1	0	0
0	34	6	34.8571	2770	15	37	0	1	0	0	0	0	13818.7	0	0	0	0	0	0	0	37	0	0	0		0	1	0
1	34	4	34.5714	1800	28	38.5714	0	1	1	0	0	0	27381.9	0	0	0	0	0	0	1	36	0	0	0	0	1	0	0
0	34	6	34.8571	2200	12	36.5714	1	1	0	0	0	0	8971.57	0	0	0	0	0	0	0	31	1	0	1	0	1	1	0
1	34	6	34.8571	2450	12	36.5714	1	1	0	0	0	0	9755.91	0	0	0	0	0	0	0	31	1	0	1	0	1	1	0
0	34	1	34.1429	1710	27	38	1	1	0	0	0	0	24913.8	0	0	0	0	0	0	0	32	0	0	0	0	1	1	0
0	34	1	34.1429	1920	22	37.2857	1	1	0	0	0	0	21643.6	0	0	0	0	0	0	0	32	0	0	0	0	1	1	0
1	34	1	34.1429	2400	16	36.4286	0	1	0	0	0	0	13562.4	0	0	0	0	0	0	0	31	1	0	0	0	1	0	0
0	34	0	34	2080	14	36	1	1	0	0	0	0	13858.4	0	0	0	0	0	0	0	42	1	0	1	0	1	1	0
1	34	0	34	2040	14	36	1	1	0	0	0	0	11763.2	0	0	0	0	0	0	0	42	1	0	1	0	1	1	0
0	34	2	34.2857	2200	16	36.5714	1	1	0	0	0	0	12532.7	0	0	0	0	0	0	0	29	1	0	1	0	0	1	0
0	34	2	34.2857	2200	16	36.5714	1	1	0	0	0	0	12566.7	0	0	0	0	0	0	0	29	1	0	1	0	0	1	0
1	34	6	34.8571	2300	12	36.5714	0	1	0	0	0	0	9919.22	0	0	0	0	0	0	0	42	1	0	0	0	1	0	1
1	34	3	34.4286	3000	10	35.8571	0	1	0	0	0	0	11275.3	0	0	0	0	0	0	0	36	1	0	0	0	1	1	0
1	34	5	34.7143	1910	19	37.4286	1	1	0	0	0	0	18643.4	0	0	0	0	0	0	1	27	1	0	0		0	1	0
1	34	5	34.7143	1870	19	37.4286	1	1	1	0	0	0	18584.4	0	0	0	0	0	0	1	27	1	0	0		0	1	0
1	34	0	34	2300	21	37	0	1	0	0	0	0	13717.6	0	0	0	0	0	0	0	31	0	0	0	0	0	0	0
0	34	6	34.8571	2320	15	37	1	1	0	0	0	0	20151.3	0	0	0	0	0	0	0	30	1	0	0	0	1	1	0
0	34	6	34.8571	1700	26	38.5714	1	1	1	0	0	0	25652.4	0	0	0	0	0	0	1	30	1	0	0	0	1	1	0
1	34	1	34.1429	2060	17	36.5714	0	1	0	0	0	0	12948.2	0	0	0	0	0	0	0	45	1	0	1	0	1	1	1
1	34	6	34.8571	2630	13	36.7143	0	1	0	0	0	0	11494.2	0	0	0		0	0	0	37	0	0	1	0	0	1	0
0	34	6	34.8571	2180	13	36.7143	1	1	0	0	0	0	9780.15	0	0	0	0	0	0	0	36	1	1	0	0	1	1	0
0	34	6	34.8571	2290	13	36.7143	1	1	0	0	0	0	9914.11	0	0	0	0	0	0	0	36	1	1	0	0	1	1	0
0	34	0	34	1800	20	36.8571	0	1	0	0	0	0	18181.3	0	0	0	0	0	0	0	32	1	0	1	0	1	1	0
1	34	3	34.4286	2100	16	36.7143	0	1	0	0	0	0	11737.1	0	0	0		0	0	0	36	0	0	1	0	1	1	1
1	34	0	34	1500	32	38.5714	0	1	1	0	0	0	26663.5	0	0	0	0	0	0	1	26	1	0	0	0	1	1	0
1	34	3	34.4286	2140	15	36.5714	0	1	0	0	0	0	14162.5	0	0	0	0	0	0	0	28	1	0	0	0	1	0	1
1	34	5	34.7143	3350	11	36.2857	0	1	0	0	0	0	8846	0	0	0	0	0	0	0	28	0	1	1	0	1	0	1
1	34	6	34.8571	2300	8	36	0	1	0	0	0	0	6172.3	0	0	0	0	0	0	0	31	1	0	1	0	1	0	1
1	34	1	34.1429	2600	10	35.5714	0	1	0	0	0	0	9964.91	0	0	0	0	0	0	0	37	0	0	1	0	1	0	0
1	34	0	34	1900	18	36.5714	0	1	0	0	0	0	20147.7	0	0	0	0	0	0	0	36	0	0	1	0	1	1	0
0	34	0	34	2570	10	35.4286	0	1	0	0	0	0	7899.02	0	0	0		0	0	0	33	1	0	0	0	1	0	0
1	34	1	34.1429	2700	8	35.2857	0	1	0	0	0	0	6239.42	0	0	0		0	0	0	29	1	0	1	0	0	0	0
0	34	3	34.4286	2400	11	36	0	1	0	0	0	0	7958.29	0	0	0		0	0	0	27	1	0	0		1	1	0
0	34	4	34.5714	2170	14	36.5714	0	1	0	0	0	0	9935.87	0	0	0		0	0	0	28	1	1	0		1	1	0
1	35	0	35	2470	6	35.8571	1	1	0	0	0	0	4508.51		0	0		0	0	0	27	1	1	0	0	0	1	0
1	35	0	35	1530	28	39	1	1	1	0	0	0	21298.5	0	0	0	0	0	0	1	27	1	1	0	0	0	1	0
1	35	3	35.4286	2600	4	36	1	1	0	0	0	0	4111.37	0	0	0		0	0	0	36	0	0	0	0	0	1	0
0	35	3	35.4286	2400	4	36	1	1	0	0	0	0	4063.57	0	0	0		0	0	0	36	0	0	0	0	0	1	0
1	35	0	35	2500	9	36.2857	0	1	0	0	0	0	9798.29	0	0	0		0	0	0	36	0	0	1	0	0	1	0
1	35	1	35.1429	2170	10	36.5714	1	1	0	0	0	0	7198.75	0	0	0	0	0	0	0	35	0	0	0	0	0	1	0
1	35	1	35.1429	2600	7	36.1429	1	1	0	0	0	0	5717.36	0	0	0	0	0	0	0	35	0	0	0	0	0	1	0
0	35	0	35	1920	22	38.1429	1	1	0	0	0	0	14667.8	0	0	0	0	0	0	1	31	1	0	0	0	0	1	0
1	35	0	35	2130	19	37.7143	1	1	0	0	0	0	13021.9	0	0	0		0	0	0	31	1	0	0	0	0	1	0
1	35	6	35.8571	2850	14	37.8571	0	1	0	0	0	0	12178.7	0	0	0		0	0	0	45	0	0	0	1	0	1	1
0	35	0	35	2280	15	37.1429	0	1	0	0	0	0	10138.2	0	0	0		0	0	0	29	0	0	1	0	1	1	0
1	35	5	35.7143	2700	10	37.1429	0	1	0	0	0	0	7697.42	0	0	0		0	1	0	27	1	0	0	0	0	0	0
0	35	4	35.5714	2520	9	36.8571	0	1	0	0	0	0	7378.48	0	0	0	0	0	0	0	34	1	0	1	0	0	0	0
0	35	2	35.2857	1650	23	38.5714	1	1	1	0	0	0	20859.2	0	0	0	0	0	0	1	28	1	0	0	0	0	1	0
0	35	2	35.2857	2360	10	36.7143	1	1	0	0	0	0	9036.09	0	0	0		1	0	0	28	1	0	0	0	0	1	0
1	35	6	35.8571	2390	9	37.1429	0	1	0	0	0	0	6597.75	0	0	0	0	0	0	0	33	0	0	0	0	0	1	0
1	35	5	35.7143	3050	6	36.5714	0	1	0	0	0	0	4908.99	0	0	0	0	0	0	0	32	1	0	0		0	0	0
1	35	4	35.5714	2350	8	36.7143	0	1	0	0	0	0	5734.88	0	0	0		0	0	0	28	1	0	1	0	0	0	1
1	35	6	35.8571	2200	7	36.8571	0	1	0	0	0	0	5473.12	0	0	0		0	0	0	33	0	1	0	0	0	0	0
1	35	0	35	2150	14	37	1	1	0	0	0	0	14601.9	0	0	0	0	0	0	1	22	1	0	0	0	1	1	0
0	35	0	35	2050	17	37.4286	1	1	0	0	0	0	11079.6	0	0	0	0	0	0	1	22	1	0	0	0	1	1	0
1	35	0	35	2500	13	36.8571	0	1	0	0	0	0	14019.7	0	0	0		0	0	0	25	0	0	0	0	0	0	0
1	35	6	35.8571	3200	9	37.1429	0	1	0	0	0	0	12952.9	0	0	0		0	0	0	30	1	0	0	0	0	1	0
0	35	5	35.7143	2430	7	36.7143	0	1	0	0	0	0	8137.42		0	0		0	0	0	30	0	0	0		0	1	0
0	35	6	35.8571	2300	7	36.8571	0	1	0	0	0	0	5472.82		0	0	0	0	0	0	27	0	0	0	0	0	0	0
0	35	0	35	2360	14	37	0	1	0	0	0	0	11389.2	0	0	0	0	0	0	0	33	1	0	0		1	1	0
0	35	1	35.1429	2050	25	38.7143	0	1	0	0	0	0	21593	0	0	0		0	1	0	34	0	1	0	0	1	1	0
1	35	0	35	2460	11	36.5714	1	1	0	0	0	0	9520.95	0	0	0		0	0	0	33	1	0	0		1	1	0
0	35	0	35	2220	11	36.5714	1	1	0	0	0	0	9134.53	0	0	0		0	0	0	33	1	0	0		1	1	0
1	35	2	35.2857	2200	10	36.7143	0	1	0	0	0	0	11569	0	0	0		0	0	0	40	0	1	0		0	1	0
1	35	3	35.4286	2480	9	36.7143	0	1	0	0	0	0	8652.88	0	0	0		0	0	0	25	1	0	0	0	1	0	1
0	35	0	35	2800	9	36.2857	0	1	0	0	0	0	13461	0	0	0	0	0	0	0	40	0	0	0	0	0	1	0
1	35	2	35.2857	2550	10	36.7143	0	1	0	0	0	0	7290.58	0	0	0	0	0	0	0	28	0	0	0	0	0	0	0
0	35	4	35.5714	3250	6	36.4286	1	1	0	0	0	0	4999.67	0	0	0		0	0	0	31	0	0	0	0	1	1	0
0	35	1	35.1429	2800	4	35.7143	0	1	0	0	0	0	3707	0	0	0		0	0	0	27	1	0	0	0	1	0	0
1	35	0	35	1900	25	38.5714	1	1	1	0	0	0	24965.7	0	0	0	0	0	0	1	30	1	0	0	1	0	1	0
0	35	0	35	2350	11	36.5714	1	1	0	0	0	0	13283.3	0	0	0		0	0	0	36	1	0	0	1	0	1	0
1	35	2	35.2857	2700	6	36.1429	1	1	0	0	0	0	7004.62	0	0	0	0	0	0	0	36	0	0	0		0	1	0
1	35	2	35.2857	2800	6	36.1429	1	1	0	0	0	0	9518.02	0	0	0	0	0	0	0	36	0	0	0		0	1	0
1	35	6	35.8571	2400	7	36.8571	1	1	0	0	0	0	6217.62	0	0	0		0	0	0	36	1	0	1	0	1	1	0
1	35	6	35.8571	2150	11	37.4286	1	1	0	0	0	0	9497.97	0	0	0		0	0	1	36	1	0	1	0	1	1	0
1	35	5	35.7143	2720	12	37.4286	0	1	0	0	0	0	15218.8	0	0	0	0	0	0	0	28	0	0	0		0	1	0
1	35	6	35.8571	2580	9	37.1429	0	1	0	0	0	0	8345.97	0	0	0		0	0	0	34	1	0	0	1	0	0	1
0	35	0	35	2500	10	36.4286	1	1	0	0	0	0	7918.95	0	0	0		0	0	0	31	1	1	0	1	0	1	0
1	35	0	35	2250	10	36.4286	1	1	0	0	0	0	8599.72	0	0	0		0	0	0	31	1	1	0	1	0	1	0
0	35	0	35	2400	10	36.4286	0	1	0	0	0	0	7462.62	0	0	0		0	0	0	35	1	0	0	1	0	1	0
1	35	5	35.7143	2550	9	37	0	1	0	0	0	0	11659.3	0	0	0		0	0	0	24	1	0	0	0	0	0	0
1	35	5	35.7143	2750	10	37.1429	0	1	0	0	0	0	9959.82	0	0	0		0	0	0	32	0	0	0	0	0	1	0
0	35	1	35.1429	2230	18	37.8571	1	1	0	0	0	0	21800.3	0	0	0	0	0	0	1	27	0	0	0	0	1	0	0
0	35	1	35.1429	2100	18	37.7143	1	1	0	0	0	0	15744.7	0	0	0	0	0	0	1	27	0	0	0	0	1	0	0
0	35	3	35.4286	1890	18	38	0	1	1	0	0	0	19458.6	0	0	0	0	0	1	0	34	1	0	0		0	1	0
0	35	5	35.7143	2400	9	37.1429	0	1	0	0	0	0	7086.26	0	0	0		0	0	0	30	0	0	0	0	0	0	0
1	35	1	35.1429	1980	20	38	0	1	1	0	0	0	22566.6	0	0	0	0	0	0	1	30	1	0	1		1	1	0
0	35	3	35.4286	2480	11	37	0	1	0	0	0	0	10302.9	0	0	0		0	0	0	36	0	0	1	0	0	1	0
1	35	3	35.4286	2450	7	36.4286	0	1	0	0	0	0	6012.9	0	0	0		0	0	0	40	0	0	0	0	1	1	0
0	35	4	35.5714	2050	13	37.4286	0	1	0	0	0	0	11030.2	0	0	0	0	0	0	1	29	1	0	0		0	1	0
1	35	6	35.8571	2280	10	37.2857	0	1	0	0	0	0	8078.34	0	0	0	0	0	0	1	25	0	0	0	0	0	0	0
1	35	5	35.7143	2100	12	37.4286	0	1	1	0	0	0	10736.5	0	0	0		0	0	0	29	0	0	1	0	0	0	0
0	35	4	35.5714	2300	18	38.1429	0	1	0	0	0	0	16515.2	0	0	0	0	0	0	0	30	0	0	0	0	0	0	0
0	35	4	35.5714	2600	13	37.4286	0	1	0	0	0	0	12045.3	0	0	0	0	0	0	0	33	0	0	0	0	0	0	0
1	35	2	35.2857	2550	12	37	0	1	0	0	0	0	9664.28	0	0	0	0	0	0	0	38	1	0	0	0	0	1	0
0	35	5	35.7143	2270	8	36.8571	0	1	0	0	0	0	7166.36	0	0	0	0	0	0	0	28	1	0	0		0	1	0
0	35	3	35.4286	2480	8	36.5714	0	1	0	0	0	0	6975.85	0	0	0		0	0	0	31	0	0	0	0	0	1	0
1	35	6	35.8571	2400	7	36.8571	1	1	0	0	0	0	6093.7	0	0	0	0	0	0	0	30	1	0	0	0	1	1	0
0	35	0	35	2220	17	37.4286	0	1	0	0	0	0	16560.3	1	0	0	0	0	0	0	38	1	0	1	1	1	1	0
0	35	0	35	1450	29	39.1429	0	1	1	0	0	0	29989.8	0	0	0	0	0	0	1	32	0	1	0		1	1	0
0	35	0	35	1950	17	37.4286	1	1	0	0	0	0	13155.9	0	0	0	0	0	0	0	34	1	0	0	0	1	1	0
1	35	0	35	1740	19	37.7143	1	1	1	0	0	0	18133.1	0	0	0	0	0	0	1	34	1	0	0	0	1	1	0
1	35	0	35	2200	8	36.1429	0	1	0	0	0	0	5768.94	0	0	0		0	0	0	34	0	0	1	0	1	1	0
0	35	1	35.1429	2690	9	36.4286	0	1	0	0	0	0	6173.86	0	0	0		0	0	0	35	0	0	0	0	0	0	0
0	35	2	35.2857	3000	7	36.2857	0	1	0	0	0	0	6296.34	0	0	0		0	0	0	42	1	0	0	0	1	1	0
1	35	6	35.8571	2450	9	37.1429	1	1	0	0	0	0	7334.52	0	0	0	0	0	0	0	33	1	1	0	0	1	1	0
1	35	6	35.8571	2250	9	37.1429	1	1	0	1	0	0	7965.35	0	0	0	0	0	0	0	33	1	1	0	0	1	1	0
0	35	4	35.5714	2200	10	37	0	1	0	0	0	0	7423.18	0	0	0	0	0	0	0	36	1	0	0	1	0	0	0
1	35	3	35.4286	2250	12	37.1429	1	1	0	0	0	0	8364.71	0	0	0	0	0	0	1	35	0	0	0	0	0	1	0
1	35	3	35.4286	2880	14	37.4286	1	1	0	0	0	0	16111	0	0	0	0	0	0	0	35	0	0	0	0	0	1	0
0	35	1	35.1429	2200	11	36.7143	1	1	0	0	0	0	9865.04	0	0	0	0	0	0	0	28	1	0	0	0	0	1	0
1	35	1	35.1429	2370	11	36.7143	1	1	0	0	0	0	9921.65	0	0	0	0	0	0	0	28	1	0	0	0	0	1	0
0	35	0	35	2200	9	36.2857	0	1	0	0	0	0	7344.01	0	0	0		0	0	0	29	1	0	0	0	1	1	0
0	35	2	35.2857	2630	5	36	0	1	0	0	0	0	3901.1		0	0		0	0	0	31	1	0	0	0	0	1	0
1	35	3	35.4286	3300	7	36.4286	0	1	0	0	0	0	5150.24	0	0	0	0	0	0	0	42	0	0	1	0	0	1	0
0	35	2	35.2857	2300	8	36.4286	0	1	0	0	0	0	6068.44	0	0	0		0	0	0	39	0	0	0	0	0	1	0
1	35	5	35.7143	2600	9	37	0	1	0	0	0	0	6344.22	0	0	0	0	0	0	0	30	1	0	0	0	1	0	0
1	35	2	35.2857	2400	12	37	0	1	0	0	0	0	7978.17	0	0	0	0	0	0	0	31	0	0	1	0	0	1	0
1	35	4	35.5714	2400	8	36.7143	0	1	0	0	0	0	9343.8	0	0	0	0	0	0	0	28	0	0	0	0	1	1	0
0	35	1	35.1429	2330	7	36.1429	0	1	0	0	0	0	4717.9	0	0	0		0	0	0	27	1	0	0	0	1	1	0
0	35	0	35	2200	14	37	0	1	0	0	0	0	10565.7	0	0	0	0	0	0	0	43	0	1	0		1	1	0
1	35	5	35.7143	2190	15	37.8571	0	1	0	0	0	0	19413.9	0	0	0	0	0	1	1	29	1	0	0	1	0	0	0
1	35	0	35	1800	21	38	0	1	1	0	0	0	19762.1	0	0	0	0	0	0	1	24	1	0	0	0	1	1	1
1	35	5	35.7143	2950	7	36.7143	0	1	0	0	0	0	5675.24	0	0	0	0	0	0	0	40	1	0	0		1	1	0
1	35	2	35.2857	3500	8	36.4286	0	1	0	0	0	0	7558.2	0	0	0		0	0	0	32	1	0	1	0	0	0	0
1	35	3	35.4286	2500	9	36.7143	0	1	0	0	0	0	6102.23	0	0	0	0	0	0	0	34	0	0	1	0	0	0	0
0	36	2	36.2857	2410	7	37.2857	0	1	0	0	0	0	4976.84	0	0	0		0	0	0	31	1	1	0		0	1	0
1	36	3	36.4286	2700	6	37.2857	0	1	0	0	0	0	4536.11	0	0	0		0	0	0	27	1	0	0	0	0	1	0
1	36	3	36.4286	1990	16	38.7143	0	1	1	0	0	0	12333.1	0	0	0	0	0	0	1	47	0	0	0		0	1	0
0	36	0	36	2000	13	37.8571	0	1	1	0	0	0	9296.39	0	0	0		0	0	1	26	1	0	0	0	0	0	0
0	36	2	36.2857	2880	4	36.8571	0	1	0	0	0	0	3135.63		0	0	0	0	0	0	31	1	0	0	0	0	0	0
1	36	5	36.7143	2960	4	38	0	1	0	0	0	0	3269.4		0	0	0	0	0	0	30	1	0	0	1	0	0	1
1	36	0	36	2450	4	37.1429	0	1	0	0	0	0	3123.93	0	0	0		0	0	0	28	1	0	0	0	0	0	0
0	36	2	36.2857	2640	5	37	0	1	0	0	0	0	3846.34	0	0	0		0	0	0	24	1	0	0	0	0	0	0
0	36	6	36.8571	2500	9	38.1429	0	1	0	0	0	0	6279.13	0	0	0		0	0	0	37	0	0	0	0	0	0	0
0	36	4	36.5714	2760	4	38	0	1	0	0	0	0	3285.12		0	0		0	0	0	35	0	0	0	0	0	1	0
0	36	4	36.5714	2560	4	37.4286	0	1	0	0	0	0	2616.43		0	0		0	0	0	35	0	0	0	0	0	0	0
1	36	1	36.1429	2260	9	37.4286	0	1	0	0	0	0	6411.07	0	0	0		0	0	0	32	0	0	1	0	0	0	0
1	36	3	36.4286	2500	6	37.2857	0	1	0	0	0	0	4521.71	0	0	0	0	0	0	0	34	1	0	0	0	0	1	0
0	36	3	36.4286	2700	10	37.8571	0	1	0	1	0	0	9228.4	0	0	0	0	0	0	0	29	0	0	1	0	0	0	0
0	36	1	36.1429	2600	7	37.1429	0	1	0	0	0	0	5439.03	0	0	0		0	0	0	27	1	0	0	0	0	0	0
0	36	5	36.7143	3000	4	37.7143	0	1	0	0	0	0	4000.47		0	0		0	0	0	28	1	0	0	0	0	0	0
0	36	3	36.4286	2800	7	37.4286	0	1	0	0	0	0	5740.95	0	0	0	0	0	0	0	26	0	0	0	1	0	0	0
0	36	1	36.1429	2130	11	37.7143	1	1	0	0	0	0	7467.61	0	0	0		0	0	1	33	1	0	0	0	0	1	0
0	36	1	36.1429	2600	6	37	1	1	0	0	0	0	4123.04	0	0	0		0	0	0	33	1	0	0	0	0	1	0
1	36	1	36.1429	2480	7	37.1429	1	1	0	0	0	0	5091.05	0	0	0		0	0	0	40	0	0	0	1	0	1	0
1	36	1	36.1429	2150	10	37.5714	1	1	1	0	0	0	7262.05	0	0	0	0	0	0	1	40	0	0	0	1	0	1	0
1	36	5	36.7143	3050	5	37.4286	0	1	0	0	0	0	4100.22	0	0	0		0	0	0	35	1	0	0	0	0	0	1
0	36	0	36	1970	14	38	0	1	1	0	0	0	11451.3	0	0	0	0	0	0	1	36	1	0	0	0	1	1	0
0	36	3	36.4286	2550	5	37.1429	0	1	0	0	0	0	4215.19	0	0	0		0	0	0	30	0	0	0	0	0	1	0
1	36	0	36	2270	7	37	0	1	0	0	0	0	5780.78	0	0	0	0	0	0	0	32	0	0	0		1	0	0
1	36	5	36.7143	2600	4	37.2857	0	1	0	0	0	0	3236.35		0	0		0	0	0	25	0	0	0	0	0	0	0
0	36	3	36.4286	2300	9	37.7143	1	1	0	0	0	0	7042.44	0	0	0		0	0	1	25	1	0	0	0	0	1	0
0	36	3	36.4286	2050	13	38.2857	1	1	1	0	0	0	8996.11	0	0	0	0	0	0	1	25	1	0	0	0	0	1	0
1	36	2	36.2857	2750	4	37.4286	0	1	0	0	0	0	3172.32	0	0	0		0	0	0	23	1	0	0	1	0	0	1
1	36	2	36.2857	3050	3	37.2857	0	1	0	0	0	0	2406.05	0	0	0		0	0	0	27	1	0	0	0	0	0	1
0	36	1	36.1429	3100	3	36.5714	1	1	0	0	0	0	2490.19	0	0	0		0	0	0	30	1	0	0	0	0	1	0
1	36	1	36.1429	1200	47	42.8571	1	1	1	0	0	0	57340.9	0	0	0	0	0	1	1	30	1	0	0	0	0	1	0
0	36	6	36.8571	2050	11	38.5714	1	1	1	0	0	0	12554	0	0	0		0	0	1	25	1	1	0	1	0	0	0
0	36	1	36.1429	2040	12	37.8571	1	1	1	0	0	0	7835.53	0	0	0		0	0	1	23	0	0	0	0	0	0	0
1	36	1	36.1429	2100	9	37.4286	0	1	1	0	0	0	6118.99	0	0	0		0	0	0	39	0	0	1	0	0	0	0
0	36	1	36.1429	2700	5	37.1429	0	1	0	0	0	0	3059.74		0	0		0	0	0	29	0	0	0	0	0	0	0
0	36	3	36.4286	2940	8	37.5714	0	1	0	0	0	0	5794.9	0	0	0		0	0	0	27	1	0	0	0	0	0	0
0	36	2	36.2857	2380	9	37.5714	0	1	0	0	0	0	7897.65	0	0	0	0	0	0	0	30	1	0	0	0	0	0	0
1	36	1	36.1429	3000	5	36.8571	0	1	0	0	0	0	3609.02		0	0	0	0	0	0	28	0	0	0	0	0	0	0
0	36	4	36.5714	2350	7	37.5714	1	1	0	0	0	0	4186.96		0	0		0	0	0	29	0	0	1	1	0	1	0
0	36	0	36	2010	12	37.7143	1	1	1	0	0	0	9982.14	0	0	0		0	0	1	35	0	1	0	0	1	1	1
1	36	0	36	2500	8	37.1429	1	1	0	0	0	0	5897.51	0	0	0		0	0	0	30	0	0	1	0	1	1	0
1	36	0	36	2500	8	37.1429	1	1	0	0	0	0	5878.06	0	0	0		0	0	0	30	0	0	1	0	1	1	0
0	36	6	36.8571	2300	6	37.7143	0	1	1	0	0	0	5352.82	0	0	0	0	0	0	1	28	1	0	0	0	0	0	1
1	36	3	36.4286	2450	5	37.5714	0	1	0	0	0	0	4947.84	0	0	0		0	0	0	34	0	0	0	0	0	0	0
1	36	0	36	2880	7	37	0	1	0	0	0	0	6004.68	0	0	0		0	0	0	34	0	0	0	0	0	0	0
1	36	5	36.7143	2000	14	38.7143	0	1	1	0	0	0	13206.3	0	0	0	0	0	0	1	34	0	0	0	0	0	1	0
0	36	3	36.4286	1950	26	40.1429	1	1	1	0	0	0	21745.4	0	0	0		0	0	1	31	0	0	0		1	1	0
1	36	3	36.4286	2850	9	37.7143	1	1	0	0	0	0	6608.23	0	0	0	0	0	0	0	31	0	0	0		1	1	0
0	36	6	36.8571	2400	7	37.8571	0	1	0	0	0	0	7336.72	0	0	0	0	0	0	0	36	0	1	1		0	1	0
1	36	3	36.4286	3000	7	37.4286	0	1	0	0	0	0	5675.47	0	0	0		0	0	0	26	1	0	0	0	0	1	0
0	36	6	36.8571	2900	4	37.8571	0	1	0	0	0	0	3247.41	0	0	0		0	0	0	38	1	1	1	0	0	1	0
1	36	3	36.4286	2550	7	37.4286	0	1	0	0	0	0	7277.1	0	0	0		0	0	0	30	0	0	0	0	0	0	0
1	36	6	36.8571	2480	5	37.5714	0	1	0	0	0	0	5717.9	0	0	0		0	0	0	25	1	1	0	0	1	1	0
1	36	0	36	2000	13	37.8571	0	1	1	0	0	0	12181.8	0	0	0		0	0	1	23	1	0	0	1	0	0	0
0	36	2	36.2857	2350	10	37.8571	1	1	0	0	0	0	7001.08	0	0	0	0	0	0	0	23	1	0	0	1	0	1	0
1	36	2	36.2857	2500	6	37.8571	1	1	0	0	0	0	4213.55	0	0	0	0	0	0	0	23	1	0	0	1	0	1	0
0	36	3	36.4286	2470	6	37.2857	1	1	0	0	0	0	4938.93	0	0	0		0	0	0	34	1	0	0	0	0	1	0
0	36	3	36.4286	2460	6	37.2857	1	1	0	0	0	0	4943.97	0	0	0		0	0	0	34	1	0	0	0	0	1	0
1	36	3	36.4286	3050	3	36.8571	0	1	0	0	0	0	3417.11	0	0	0		0	0	0	36	1	0	0	0	0	1	0
1	36	0	36	3250	4	36.7143	0	1	0	0	0	0	3588.88	0	0	0		0	0	0	28	0	0	0	1	1	0	0
1	36	5	36.7143	2500	8	37.8571	1	1	0	0	0	0	6029.06	0	0	0	0	0	0	0	39	0	0	0	0	0	1	0
1	36	5	36.7143	1800	16	39	1	1	1	0	0	0	12394.6	0	0	0	0	0	0	1	39	0	0	0	0	0	1	0
0	36	4	36.5714	3000	4	37.7143	0	1	0	0	0	0	2899.39	0	0	0		0	0	0	32	0	0	0	0	0	1	0
0	36	0	36	2300	7	37	0	1	0	0	0	0	5505.03	0	0	0		0	0	0	26	0	0	0	0	0	0	0
1	36	0	36	2920	6	36.8571	1	1	0	0	0	0	4814.94	0	0	0	0	0	0	0	26	1	0	0	0	1	1	0
1	36	0	36	3250	6	36.8571	1	1	0	0	0	0	4836.08	0	0	0	0	0	0	0	26	1	0	0	0	1	1	0
0	36	4	36.5714	2680	7	37.5714	0	1	0	0	0	0	6723.35	0	0	0	0	0	0	0	28	1	0	0	0	0	0	1
1	36	1	36.1429	2170	14	38.1429	1	1	1	0	0	0	8647.95	0	0	0	0	0	0	1	36	1	0	0	0	1	1	0
0	36	1	36.1429	2260	4	37.4286	1	1	0	0	0	0	3118.65	0	0	0	0	0	0	0	36	1	0	0	0	1	1	0
1	36	0	36	2700	7	37	0	1	0	0	0	0	5999.85	0	0	0	0	0	0	0	29	0	0	1	0	0	0	1
0	36	1	36.1429	2410	8	37.2857	1	1	0	0	0	0	5996.53	0	0	0	0	0	0	0	32	1	1	0	0	1	1	0
1	36	1	36.1429	2600	6	37	1	1	0	0	0	0	5193.83	0	0	0	0	0	0	0	32	1	1	0	0	1	1	0
0	36	1	36.1429	2030	16	38.4286	0	1	1	0	0	0	10038.5	0	0	0	0	0	0	1	42	0	0	0	0	1	1	0
0	36	1	36.1429	2150	9	37.4286	1	1	0	0	0	0	6755.57	0	0	0	0	0	0	1	23	1	0	1	0	0	0	0
1	36	4	36.5714	2650	5	37.2857	0	1	0	0	0	0	5100.04	0	0	0		0	0	0	37	0	0	0	0	0	1	0
1	36	4	36.5714	2600	6	37.4286	1	1	0	1	0	0	4784.77	0	0	0	0	0	0	0	37	1	0	1	0	0	1	0
1	36	4	36.5714	2930	6	37.4286	1	1	0	1	0	0	4397.39	0	0	0	0	0	0	0	37	1	0	1	0	0	1	0
0	36	2	36.2857	2550	4	37.2857	0	1	0	0	0	0	3668.44	0	0	0		0	0	0	28	1	0	0	0	0	0	0
0	36	3	36.4286	2800	3	37.2857	0	1	0	0	0	0	3086.94	0	0	0		0	0	0	36	1	0	0	0	0	0	0
1	36	0	36	2600	5	36.7143	1	1	0	0	0	0	4366.73	0	0	0		0	0	0	27	0	0	0	0	0	1	0
0	36	3	36.4286	2650	5	37.1429	0	1	0	0	0	0	6943.77	0	0	0		0	0	0	36	0	0	0	1	0	1	1
1	36	2	36.2857	2680	5	37.1429	0	1	0	0	0	0	4549.7	0	0	0		0	0	0	34	1	0	1	1	0	0	0
1	36	0	36	2500	8	37.1429	0	1	0	0	0	0	6046.3	0	0	0	0	0	0	0	27	1	0	0	0	0	0	0
1	36	3	36.4286	3300	4	37.5714	0	1	0	0	0	0	3218.82	0	0	0		0	0	0	36	1	1	1	0	0	1	0
0	36	2	36.2857	2300	7	37.2857	1	1	0	0	0	0	4459.69	0	0	0	0	0	0	0	29	1	1	1	0	0	1	0
1	36	2	36.2857	2480	7	37.2857	1	1	0	0	0	0	7636.31	0	0	0	0	0	0	0	29	1	1	1	0	0	1	0
0	36	6	36.8571	2350	5	37.5714	0	1	0	0	0	0	4036.27	0	0	0		0	0	0	26	1	0	0	0	0	1	0
0	36	6	36.8571	2250	9	38.2857	1	1	1	0	0	0	6634.05	0	0	0		0	0	1	30	1	0	0	0	1	1	0
1	36	2	36.2857	2390	12	38	0	1	0	0	0	0	8462.87	0	0	0	0	0	0	1	33	1	0	0		0	0	0
0	36	2	36.2857	3400	6	37.1429	0	1	0	0	0	0	5074.8	0	0	0		0	0	0	33	1	0	1	0	0	0	0
0	36	1	36.1429	2650	5	36.8571	0	1	0	0	0	0	4472.87	0	0	0	0	0	0	0	29	1	0	0	1	0	0	1
0	36	0	36	2400	7	37	1	1	0	0	0	0	5023.98	0	0	0		0	0	0	30	1	0	0	0	0	1	1
1	36	2	36.2857	2400	5	37	0	1	0	0	0	0	3962.07	0	0	0		0	0	1	31	1	0	0	0	0	0	0
1	36	1	36.1429	2500	3	36.5714	0	1	0	0	0	0	2772.94		0	0		0	0	0	34	0	0	0	0	1	1	0
1	36	0	36	2790	4	36.5714	0	1	0	0	0	0	3498.97	0	0	0	0	0	0	0	24	1	0	0	0	1	1	0
0	36	1	36.1429	2160	13	38	0	1	0	0	0	0	8732.05	0	0	0	0	0	0	1	36	1	0	0	0	1	1	0
1	36	1	36.1429	2380	5	36.8571	0	1	0	0	0	0	4094.72	0	0	0		0	0	0	27	1	0	0	0	0	0	0
1	36	3	36.4286	2400	6	37.2857	0	1	0	0	0	0	4814.69	0	0	0		0	0	0	35	0	0	1	1	0	1	0
0	36	6	36.8571	2450	7	37.8571	0	1	0	0	0	0	5575.67	0	0	0	0	0	0	0	27	1	0	0	0	0	0	0
1	36	3	36.4286	3100	8	37.5714	0	1	0	0	0	0	7235.35	0	0	0		0	0	0	26	0	0	0	0	0	1	0
1	36	3	36.4286	2230	4	37	0	1	0	0	0	0	3046.67		0	0		0	0	1	30	1	0	0	0	0	1	0
1	36	4	36.5714	2300	11	38.1429	0	1	0	0	0	0	11731.1	0	0	0		0	0	1	27	1	0	0	0	0	0	0
1	36	5	36.7143	2800	4	37.8571	0	1	0	0	0	0	2977.19	0	0	0		0	0	0	38	1	0	0	0	0	0	0
1	36	0	36	2150	10	37.4286	1	1	1	0	0	0	6799.64	0	0	0		0	0	0	29	1	1	0	0	0	1	0
0	36	0	36	2050	14	38	1	1	1	0	0	0	8327.68	0	0	0		0	0	1	29	1	1	0	0	0	1	0
1	36	1	36.1429	2750	7	37.1429	0	1	0	0	0	0	5439.49	0	0	0	0	0	0	0	26	1	0	0	0	0	0	0
1	25	6	25.8571	900	90	38.7143	1	1	0	0	0	1	170912	0	0	1	0	1	0	0	39	0	1	1		1	0	0
1	35	5	35.7143	2550	5	36.4286	0	1	0	0	0	0	4232.55	0	0	0	0	0	0	0	26	1	0	0		0	0	0
1	32	1	32.1429	1450	33	36.8571	0	1	0	0	0	0	36266.3	0	0	0	0	1	0	0	29	0	1	0	0	1	1	0
1	32	0	32	1600	31	36.4286	0	1	0	0	0	0	32208.7	0	0	0	0	0	0	0	43	0	1	0	1	1	1	0
1	35	3	35.4286	2850	7	36.4286	0	1	0	0	0	0	10751.4	0	0	0	0	0	0	0	38	1	0	1	0	0	1	0
1	36	0	36	2500	8	37.1429	1	1	0	0	0	0	15480.9	0	0	0	0	0	0	0	28	1	1	1	0	0	1	0
0	35	0	35	2200	8	36.1429	0	1	0	0	0	0	8008.1	0	0	0	0	0	0	0	31	1	1	1		1	1	0
0	35	3	35.4286	1900	19	38.1429	0	1	1	0	0	0	18192.5	0	0	0	0	0	0	1	35	0	1	0		0	1	0
1	35	1	35.1429	2170	18	37.7143	0	1	0	0	0	0	10793.7	0	0	0	0	0	0	1	40	0	1	0	0	0	1	0
0	35	1	35.1429	1500	27	39	1	1	1	0	0	0	22657	0	0	0	0	0	0	1	31	1	1	1		1	1	0
0	35	1	35.1429	2240	8	36.2857	1	1	0	0	0	0	5751.12	0	0	0		0	0	0	31	1	1	1		1	1	0
1	33	4	33.5714	1950	24	37	0	1	0	0	0	0	17019	0	0	0	0	0	0	1	31	0	0	0		1	0	0
0	30	5	30.7143	1870	38	36.1429	0	1	0	0	0	0	38918.1	0	0	0	0	0	0	0	37	0	0	0	0	1	1	0
1	34	4	34.5714	2280	32	39.1429	0	1	0	0	0	0	21604.6	0	0	0	0	0	0	0	31	1	1	0		1	1	0
0	34	4	34.5714	2700	10	36	0	1	0	0	0	0	7856.66	0	0	0		0	0	0	40	1	1	0		1	1	0
1	35	0	35	2300	8	36.1429	0	1	0	0	0	0	6408.34	0	0	0		0	0	0	38	0	1	0		0	1	0
0	34	6	34.8571	2700	10	36.2857	0	1	0	0	0	0	11489.2	0	0	0		0	0	0	34	0	0	0	0	1	1	0
1	36	5	36.7143	1850	16	39	0	1	1	0	0	0	14176.9	0	0	0	0	0	0	1	24	1	0	0		1	1	0
1	35	5	35.7143	2560	5	36.4286	0	1	0	0	0	0	5181.35	0	0	0		0	0	0	35	1	0	0	0	0	1	0
1	33	6	33.8571	1460	30	38.1429	0	1	1	0	0	0	29145	0	0	0	0	0	0	1	27	0	0	0		1	1	0
0	36	5	36.7143	2290	9	38	0	1	0	0	0	0	5633.06	0	0	0		0	0	1	27	1	0	0	0	0	0	0
1	35	4	35.5714	2230	9	36.8571	0	1	0	0	0	0	6883.69	0	0	0	0	0	0	1	30	1	0	0	0	0	0	0
0	33	6	33.8571	2270	18	36.4286	0	1	0	0	0	0	15112.3	0	0	0	0	0	0	0	28	1	0	0	0	1	1	0
0	35	1	35.1429	2300	9	36.4286	0	1	0	0	0	0	6549.42	0	0	0	0	0	0	0	32	0	0	0	0	0	0	0
1	35	3	35.4286	2900	7	36.4286	0	1	0	0	0	0	5144.66	0	0	0		0	0	0	30	1	0	0	1	0	0	0
0	35	2	35.2857	1990	26	39	0	1	0	0	0	0	23590.5	0	0	0	0	0	0	1	27	1	0	0	0	0	0	0
0	36	0	36	2650	8	37.1429	0	1	0	0	0	0	6738.4	0	0	0		0	0	0	28	1	0	0	0	0	0	1
0	36	4	36.5714	2800	4	37.1429	0	1	0	0	0	0	3359.47	0	0	0		0	0	0	31	0	0	0	0	0	0	0
1	35	6	35.8571	3000	6	36.7143	0	1	0	0	0	0	4568.82	0	0	0		0	0	0	31	1	0	0	0	0	1	0
1	28	0	28	970	63	37	0	1	0	0	0	1	111262	0	0	1	0	1	0	0	34	1	1	0		1	1	0
0	33	5	33.7143	1330	40	39.4286	1	1	1	0	0	0	40778.8	0	0	0	0	0	0	1	30	0	0	0	1	1	0	0
0	33	5	33.7143	1870	28	37.7143	1	1	0	0	0	0	31358	0	0	0	0	0	0	0	30	0	0	0	1	1	0	0
0	36	6	36.8571	2870	5	37.5714	0	1	0	0	0	0	4664.21	0	0	0		0	0	0	41	1	0	0	0	0	0	1
0	32	4	32.5714	1990	25	36.1429	1	1	0	0	0	0	28852.3	0	0	0	0	0	0	0	38	0	1	0		1	1	0
0	32	4	32.5714	1300	42	38.5714	1	1	1	0	0	0	42886.8	0	0	0	0	0	0	1	38	0	1	0		1	1	0
0	35	6	35.8571	2350	9	37.1429	0	1	0	0	0	0	6869.54	0	0	0		0	0	0	36	0	1	0	0	0	1	0
0	34	4	34.5714	2070	24	38	0	1	0	0	0	0	34325.6	0	0	0	0	0	0	1	38	0	1	0	0	0	1	0
1	34	3	34.4286	2490	6	35.2857	0	1	0	0	0	0	4554.85	0	0	0		0	0	0	26	0	0	1	0	1	0	0
0	36	2	36.2857	2500	9	37.5714	0	1	0	0	0	0	7531.44	0	0	0	0	0	0	0	30	1	0	0	0	0	1	0
1	36	4	36.5714	3250	5	37.2857	0	1	0	0	0	0	4549.87	0	0	0		0	0	0	33	0	0	0	0	1	1	0
1	36	2	36.2857	2800	4	36.8571	0	1	0	0	0	0	3568.26	0	0	0		0	0	0	31	1	0	0	0	0	0	1
1	35	6	35.8571	2900	7	36.8571	0	1	0	0	0	0	5453.88	0	0	0		0	0	0	31	0	0	0	0	0	0	0
1	36	5	36.7143	2100	9	38	0	1	1	0	0	0	6463.33	0	0	0		0	0	1	33	1	0	0	0	0	1	0
0	35	1	35.1429	2300	10	36.5714	0	1	0	0	0	0	11244.5	0	0	0		0	0	0	39	0	0	0	0	1	1	0
1	36	0	36	3350	4	37.4286	0	1	0	0	0	0	3451.39	0	0	0		0	0	0	28	0	0	1	0	0	0	0
1	29	6	29.8571	1155	58	38.1429	0	1	0	0	0	0	80317.4	0	0	0	0	0	0	1	25	1	1	0	0	1	0	0
0	29	1	29.1429	1300	58	37.4286	0	1	0	0	0	1	89244.4	0	0	0	0	0	0	0	36	0	0	0		1	1	0
0	29	0	29	1150	56	37	0	1	0	1	0	1	76115	0	0	0	0	0	1	0	31	0	1	1		1	1	0
0	30	1	30.1429	1410	59	38.5714	0	1	0	0	0	0	66120.6	0	0	0	0	0	0	1	26	1	0	1	0	1	1	0
0	35	0	35	2100	9	36.2857	0	1	0	0	0	0	6852.35	0	0	0	0	0	0	0	28	1	0	0	1	0	1	0
1	30	4	30.5714	1420	50	37.7143	1	1	0	0	0	0	57831.8	0	0	1	0	0	1	0	28	1	0	0		1	1	0
1	30	4	30.5714	1560	50	37.7143	1	1	0	0	0	1	69610.7	0	0	1	0	0	0	0	28	1	0	0		1	1	0
0	35	5	35.7143	2700	6	36.5714	0	1	0	0	0	0	4485.05	0	0	0		0	0	0	32	1	0	0	0	0	0	0
1	33	0	33	2400	17	35.4286	1	1	0	0	0	0	22423.7	0	0	0		0	0	0	34	1	0	1	0	1	1	0
0	33	0	33	1750	30	37.2857	1	1	0	0	0	0	27744	0	0	0		0	0	0	34	1	0	1	0	1	1	0
1	30	0	30	930	71	40.1429	0	1	1	0	0	1	100856	0	0	1	0	0	0	1	31	1	1	0		1	1	0
0	35	1	35.1429	2600	8	36.2857	0	1	0	0	0	0	6375.2	0	0	0	1	0	0	0	31	1	0	1	0	1	1	0
1	36	1	36.1429	2950	5	36.8571	0	1	0	0	0	0	4081.57	0	0	0		0	0	0	28	0	1	1		1	1	0
1	35	4	35.5714	2600	7	36.5714	0	1	0	0	0	0	5817.57	0	0	0		0	0	0	32	1	0	0	0	0	0	0
1	35	2	35.2857	1900	20	38.1429	1	1	1	0	0	0	16098.2	0	0	0		0	0	1	35	0	0	0	0	0	1	0
0	30	0	30	1200	59	38.4286	0	1	0	1	0	1	75763.9	0	0	0	0	1	0	0	29	1	0	0	0	0	1	0
1	31	5	31.7143	1740	30	36	0	1	0	0	0	0	29671.6	0	0	0	0	0	0	0	36	1	0	0	0	1	1	1
1	34	6	34.8571	2300	10	36.2857	0	1	0	0	0	0	6931.37	0	0	0		0	0	0	35	1	0	0	0	0	0	1
1	35	1	35.1429	2400	14	37.1429	0	1	0	0	0	0	15533.8	0	0	0		0	0	0	28	1	0	0	0	1	0	0
1	35	5	35.7143	3070	14	37.7143	0	1	0	0	0	0	28149.3	0	0	0		0	0	0	33	1	1	1	0	1	1	0
0	29	2	29.2857	1200	72	39.5714	0	1	0	1	0	1	133554	0	0	0	0	1	0	0	38	0	0	0	0	1	0	0
1	34	2	34.2857	2250	20	37.1429	0	1	0	0	0	0	17855.5	0	0	0	0	0	0	0	28	0	0	0	1	1	1	0
1	34	3	34.4286	2070	15	36.5714	0	1	0	0	0	0	13307.1	0	0	0		0	0	0	35	0	0	0	0	1	0	1
1	33	6	33.8571	2120	17	36.2857	0	1	0	0	0	0	14536.1	0	0	0		0	0	0	35	0	0	0		1	1	1
1	36	1	36.1429	2590	9	37.4286	0	1	0	0	0	0	6539.07	0	0	0		0	0	0	36	1	0	0	0	0	0	0
0	33	5	33.7143	2180	16	36	0	1	0	0	0	0	16251.1	0	0	0		0	0	0	29	0	0	0	1	1	0	1
1	35	6	35.8571	2420	9	37.1429	1	1	0	0	0	0	6602.34	0	0	0		0	0	0	30	1	0	0	0	1	1	0
1	35	6	35.8571	2160	9	37.1429	1	1	0	0	0	0	8354.67	0	0	0		0	0	1	30	1	0	0	0	1	1	0
1	35	2	35.2857	2580	8	36.4286	0	1	0	0	0	0	5282.59	0	0	0		0	0	0	37	0	0	0	0	0	0	0
0	35	0	35	2000	22	38.1429	1	1	0	0	0	0	13819.9	0	0	0	0	0	0	0	31	1	0	1	0	1	1	0
0	35	0	35	1970	22	38.1429	1	1	0	0	0	0	14124.5	0	0	0	0	0	0	0	31	1	0	1	0	1	1	0
0	35	0	35	1870	29	39.1429	1	1	0	0	0	0	23367.7	0	0	0		0	0	0	31	1	0	1	0	1	1	0
0	35	2	35.2857	2050	20	38.1429	0	1	0	0	0	0	16670.9	0	0	0		0	0	1	31	1	1	0	0	0	1	0
0	27	2	27.2857	590	83	39.1429	0	1	1	0	0	0	124769	0	0	1	0	1	1	1	31	0	1	0		1	1	0
0	36	2	36.2857	2630	7	37.2857	0	1	0	0	0	0	5254.11	0	0	0		0	0	0	31	1	0	1	0	1	1	0
1	35	0	35	2750	11	36.5714	0	1	0	0	0	0	12283.6	0	0	0		0	0	0	29	0	0	0	0	1	1	0
0	36	3	36.4286	2960	8	37.5714	0	1	0	0	0	0	6127.6	0	0	0		0	0	0	36	0	0	0	0	0	1	0
0	33	2	33.2857	2060	26	37	0	1	0	0	0	0	21892.8	0	0	0	0	0	0	0	31	1	0	0	0	1	1	0
0	33	2	33.2857	1930	26	37	0	1	0	0	0	0	25269	0	0	0	0	0	0	0	31	1	0	0	0	1	1	0
1	35	1	35.1429	2520	9	36.4286	0	1	0	0	0	0	7854.31	0	0	0		0	0	0	34	1	0	0	0	1	1	0
1	36	2	36.2857	3050	7	37.2857	0	1	0	0	0	0	5435.67	0	0	0		0	0	0	40	0	1	0	0	0	0	1
0	33	6	33.8571	1720	24	37.2857	1	1	0	0	0	0	20098.6	0	0	0	0	0	0	0	29	1	1	1	1	1	1	0
0	33	6	33.8571	2270	17	36.2857	1	1	0	0	0	0	16973.9	0	0	0	0	0	0	0	29	1	1	1	1	1	1	0
1	29	3	29.4286	970	55	37.2857	1	1	0	0	0	0	66496.9	0	0	0	0	0	0	1	35	1	1	0		1	1	0
1	29	3	29.4286	1120	55	37.2857	1	1	0	0	0	0	76484.3	0	0	0	0	0	0	1	35	1	1	0		1	1	0
0	36	3	36.4286	2850	7	37.4286	0	1	0	0	0	0	5206.56	0	0	0		0	0	0	35	0	0	1	0	1	0	0
1	31	5	31.7143	1750	33	36.4286	0	1	0	0	0	0	41406.8	0	0	0	0	0	0	0	29	1	0	0	0	1	1	0
1	35	1	35.1429	2570	13	37	0	1	0	0	0	0	9376.53	0	0	0	0	0	0	0	25	1	0	0	0	1	1	1
1	36	2	36.2857	2700	4	36.8571	0	1	0	0	0	0	3729.56	0	0	0		0	0	0	32	1	1	0	0	0	1	0
1	30	1	30.1429	1580	40	35.8571	1	1	0	0	0	0	40012	0	0	0	0	0	0	0	42	0	1	1	0	1	1	0
1	30	1	30.1429	1480	40	35.8571	1	1	0	0	0	0	42800.5	0	0	0	0	0	0	0	42	0	1	1	0	1	1	0
0	35	1	35.1429	2600	8	36.2857	0	1	0	0	0	0	5752.16	0	0	0		0	0	0	28	1	0	0	0	1	0	0
1	34	6	34.8571	2540	9	36.1429	0	1	0	0	0	0	6850.36	0	0	0		0	0	0	29	0	0	0	0	1	0	0
1	33	4	33.5714	2100	20	36.4286	0	1	0	0	0	0	14296.4	0	0	0	0	0	0	0	38	0	0	0	0	1	1	0
1	35	4	35.5714	1970	19	38.2857	0	1	1	0	0	0	16701.5	0	0	0	0	0	0	1	36	1	0	0	0	0	0	0
0	35	4	35.5714	2560	7	36.5714	0	1	0	0	0	0	4995.85	0	0	0		0	0	0	33	1	1	1		1	1	0
1	33	4	33.5714	1350	39	39.1429	0	1	1	0	0	0	41638.3	0	0	0	0	0	0	1	36	0	1	1		1	1	0
0	36	5	36.7143	2330	6	37.5714	0	1	0	0	0	0	5571.03	0	0	0		0	0	0	33	0	0	0	0	0	1	0
1	35	1	35.1429	2200	10	36.5714	1	1	0	0	0	0	8225.04	0	0	0		0	0	0	28	1	0	0	0	1	1	0
1	36	2	36.2857	3150	5	37	0	1	0	0	0	0	3836.14	0	0	0		0	0	0	37	0	0	0		0	0	0
0	34	4	34.5714	2200	15	36.7143	0	1	0	0	0	0	8530.94	0	0	0		0	0	0	29	0	0	0	0	1	0	1
1	34	0	34	2050	15	36.1429	0	1	0	0	0	0	12488.1	0	0	0		0	0	1	40	0	0	0	0	1	1	1
0	36	2	36.2857	2680	5	37	0	1	0	0	0	0	3913.78	0	0	0		0	0	0	32	1	0	0	0	0	1	0
1	36	0	36	2560	5	36.7143	0	1	0	0	0	0	3987.15	0	0	0		0	0	0	29	1	0	0	0	0	1	0
1	35	2	35.2857	2780	8	36.4286	0	1	0	0	0	0	14122.7	0	0	0	0	0	0	0	27	0	0	0	0	0	1	0
1	35	5	35.7143	2730	8	36.8571	0	1	0	0	0	0	15678.9	0	0	0	0	0	0	0	30	1	0	1	0	0	0	0
0	35	5	35.7143	2300	11	37.2857	0	1	0	0	0	0	13977.8	0	0	0	0	1	0	0	33	0	0	1	0	0	1	0
0	36	5	36.7143	2110	11	38.2857	0	1	1	0	0	0	24197.7	0	0	0	0	0	0	1	27	1	0	0	0	0	0	0
1	36	1	36.1429	2600	6	37.2857	0	1	0	0	0	0	8440.71	0	0	0	0	0	0	0	35	0	0	0	0	0	0	0
1	34	1	34.1429	2120	16	36.4286	0	1	0	0	0	0	52515.2	0	0	0	0	0	0	1	25	1	0	0	0	1	0	1
0	36	2	36.2857	2340	9	37.5714	0	1	0	0	0	0	16556.5	0	0	0	0	0	0	1	29	1	0	0	0	0	0	1
1	36	3	36.4286	2540	3	37.4286	0	1	0	0	0	0	5059.42	0	0	0		0	0	0	29	1	0	0	1	0	0	0
0	36	5	36.7143	2450	5	37.4286	0	1	0	0	0	0	7618.13	0	0	0		0	0	0	33	0	0	0	0	0	0	0
1	36	0	36	2710	7	37.2857	0	1	0	0	0	0	9068.67	0	0	0	0	0	0	0	25	1	0	1	0	0	0	0
1	35	4	35.5714	2610	12	37.2857	1	1	0	0	0	0	20420.9	0	0	0	0	0	0	0	42	1	0	0	0	1	1	0
0	35	4	35.5714	2380	9	36.8571	1	1	0	0	0	0	15224.5	0	0	0	0	0	0	0	42	1	0	0	0	1	1	0
0	36	3	36.4286	2950	4	37.2857	0	1	0	0	0	0	12941.8	0	0	0	0	0	0	0	31	1	0	1	0	1	0	0
1	36	6	36.8571	2520	12	38.5714	0	1	0	0	0	0	38548.8	0	0	0	0	0	0	1	30	1	0	0	0	0	1	0
0	36	4	36.5714	2220	9	37.8571	0	1	1	0	0	0	11005	0	0	0	0	0	0	1	28	0	1	0	0	0	1	0
1	34	5	34.7143	2590	13	36.5714	0	1	0	0	0	0	22353.8	0	0	0	0	0	0	0	35	1	1	0	0	0	1	0
1	34	0	34	2730	8	35.1429	0	1	0	0	0	0	15533.3	0	0	0	0	0	0	0	31	0	0	1	0	1	1	0
1	36	2	36.2857	2980	7	37.2857	0	1	0	0	0	0	9484.46	0	0	0	0	0	0	0	33	1	0	0	0	0	1	0
0	36	6	36.8571	2480	4	38	0	1	0	0	0	0	5938.82	0	0	0	0	0	0	1	34	1	0	0	0	0	1	1
1	33	0	33	1560	33	37.7143	0	1	0	0	0	0	71939.7	0	0	0	0	0	0	1	27	1	1	1	0	0	1	0
0	36	5	36.7143	2770	7	38.1429	1	1	0	0	0	0	8834.43	0	0	0	0	0	0	0	37	1	1	0	0	0	1	0
0	36	5	36.7143	2700	7	38.1429	1	1	0	0	0	0	9588.99	0	0	0	0	0	0	0	37	1	1	0	0	0	1	0
1	36	0	36	2410	11	37.5714	0	1	0	0	0	0	12509.8	0	0	0	0	0	0	0	33	0	1	1	0	0	1	0
0	34	4	34.5714	2050	13	36.4286	1	1	0	0	0	0	21775.5	0	0	0	0	0	0	1	29	1	1	0	0	0	1	0
0	35	4	35.5714	2840	10	37	0	1	0	0	0	0	18822.4	0	0	0	0	0	0	0	26	1	0	0	0	0	1	0
1	35	0	35	2310	14	37	1	1	0	0	0	0	23705.7	0	0	0	0	0	0	0	29	1	1	0	0	1	1	0
1	34	1	34.1429	2220	11	35.7143	0	1	0	0	0	0	19618.7	0	0	0	0	0	0	0	23	1	0	0	0	0	0	0
0	35	4	35.5714	3400	20	38.4286	0	1	0	0	0	0	33045.8	0	0	0	0	1	0	0	26	1	0	0	0	1	0	0
1	33	0	33	3410	32	37.5714	0	1	1	1	1	1	68049.1	0	1	1	1	1	0	0	35	0	0	1	0	1	1	0
0	36	0	36	2070	9	37.2857	1	1	0	0	0	0	16601.8	0	0	0		0	0	1	33	1	0	1	0	0	1	0
1	35	2	35.2857	2490	14	37.2857	0	1	0	0	0	0	36240.2	0	0	0	0	0	0	0	35	0	0	0	0	0	1	0
1	35	6	35.8571	2980	13	37.7143	0	1	0	0	0	1	37724.1	0	0	0	0	0	0	0	43	0	0	0	0	1	1	0
1	35	6	35.8571	2730	8	37	0	1	0	0	0	0	11327.5	0	0	0	0	0	0	0	28	1	0	0	0	0	0	0
1	36	1	36.1429	2860	6	37	0	1	0	0	0	0	11102.4	0	0	0	0	0	0	0	30	0	0	0	0	1	1	0
1	33	1	33.1429	2000	20	36	0	1	0	0	0	0	32658.9	0	0	0	0	0	0	0	31	0	0	0	0	1	0	0
0	36	5	36.7143	1970	14	38.7143	1	1	1	0	0	0	16614.6	0	0	0	0	0	0	1	26	1	0	0	0	1	1	0
0	36	5	36.7143	2500	8	37.8571	0	1	0	0	0	0	10801.8	0	0	0	0	0	0	1	26	1	0	0	0	1	1	0
0	33	5	33.7143	1770	27	37.5714	0	1	0	0	0	0	43617.4	0	0	0	0	0	0	0	35	0	0	1	0	1	1	1
1	35	1	35.1429	1570	23	38.4286	0	1	1	0	0	0	36875.3	0	0	0	0	0	0	1	29	1	0	0	0	0	1	0
1	34	2	34.2857	3140	12	36	0	1	0	0	0	0	20877.9	0	0	0	0	0	0	0	37	0	0	1	0	1	1	0
1	36	2	36.2857	2200	12	38	0	1	1	0	0	0	16184.1	0	0	0	0	0	1	1	37	0	1	0	0	0	1	0
1	29	3	29.4286	1390	48	36.2857	0	1	0	0	0	1	101687	0	0	0	0	0	0	0	33	0	0	0	0	1	1	0
0	35	6	35.8571	2360	7	36.8571	1	1	0	0	0	0	10252.6	0	0	0	0	0	0	0	44	0	0	0	0	0	1	0
1	34	1	34.1429	1800	20	37	0	1	0	0	0	0	32127.3	0	0	0	0	0	0	1	28	1	0	0	0	0	1	0
1	33	0	33	1960	20	35.8571	0	1	0	0	0	1	43925.7	0	0	0	0	0	0	0	33	1	0	1	0	0	1	1
1	33	2	33.2857	1780	24	36.7143	0	1	0	0	0	0	39702.4	0	0	0	0	0	0	1	25	1	1	0	0	1	1	0
1	34	2	34.2857	2360	15	36.4286	0	1	0	0	0	0	21867.7	0	0	0		0	0	0	37	0	0	1	0	1	1	1
0	34	6	34.8571	1690	28	38.8571	1	1	1	0	0	0	31618.5	0	0	0	0	0	0	1	33	0	0	0	0	1	1	0
1	34	6	34.8571	2000	19	37.5714	1	1	0	0	0	0	24368.4	0	0	0	0	1	0	1	33	0	0	0	0	1	1	0
1	35	6	35.8571	2580	9	37.1429	1	1	0	0	0	0	19086.7	0	0	0	0	0	0	0	29	1	0	0	0	1	1	0
1	35	5	35.7143	2550	9	37	0	1	0	0	0	0	18312.5	0	0	0	0	0	0	0	37	0	0	0	0	0	1	0
1	34	2	34.2857	2630	8	35.4286	0	1	0	0	0	0	11254.7	0	0	0	0	0	0	0	29	1	0	0	0	1	1	1
0	34	0	34	2010	16	36.2857	0	1	0	0	0	0	25971.5	0	0	0	0	0	0	0	38	0	1	0	0	1	1	0
1	35	5	35.7143	2830	9	37	0	1	0	0	0	0	12675.5	0	0	0	0	0	0	0	35	1	0	0	0	0	1	0
1	36	6	36.8571	2760	6	38.2857	0	1	0	0	0	0	7764.27	0	0	0	0	0	0	0	36	0	0	0	0	0	1	0
0	35	2	35.2857	2310	18	37.8571	1	1	0	0	0	0	32760.7	0	0	0	0	0	0	0	25	1	1	0	0	1	1	0
0	35	2	35.2857	1930	18	37.8571	1	1	1	0	0	0	30340.4	0	0	0	0	0	0	1	25	1	1	0	0	1	1	0
0	32	6	32.8571	1960	27	36.7143	0	1	0	0	0	0	43145.5	0	0	0	0	0	0	0	34	0	1	0	0	0	1	0
0	36	2	36.2857	2360	11	37.8571	0	1	0	0	0	0	20356.9	0	0	0	0	0	0	1	33	1	0	1	0	1	0	0
1	32	0	32	2000	28	36	0	1	0	0	0	0	53797	0	0	0	0	1	0	0	34	1	0	1	0	1	1	0
0	36	5	36.7143	2600	6	37.5714	0	1	0	0	0	0	8692.27	0	0	0	0	0	0	0	35	0	0	0	0	0	1	0
1	35	0	35	2270	12	36.7143	0	1	0	0	0	0	15281.4	0	0	0	0	0	0	0	29	1	0	0	0	0	0	0
1	32	2	32.2857	1560	29	36.4286	0	1	0	0	0	1	55755.3	0	0	0	0	0	0	0	35	0	0	0	0	1	1	1
1	36	2	36.2857	2440	9	37.5714	0	1	0	0	0	0	12497.1	0	0	0	0	0	0	0	34	1	0	1	0	0	0	1
0	36	0	36	2090	12	37.7143	0	1	1	0	0	0	15342.7	1	0	0	0	0	0	1	25	1	0	0	0	0	0	0
1	27	6	27.8571	1150	62	36.7143	0	1	0	0	0	1	133003	0	0	1	0	0	0	1	28	1	0	1	0	1	1	0
1	27	3	27.4286	800	67	37	0	1	0	1	0	1	156429	0	0	0	0	0	0	0	36	0	1	1	0	1	1	0
1	36	6	36.8571	2990	8	38.5714	0	1	0	0	0	0	10950.8	0	0	0	0	0	0	0	31	1	0	0	0	0	0	0
0	34	4	34.5714	3160	9	35.8571	0	1	0	0	0	0	18220.9	0	0	0	0	0	0	0	42	0	0	1	0	0	1	0
0	34	5	34.7143	1500	23	38	1	1	1	0	0	0	40314.3	0	0	0	0	0	0	1	23	1	1	0	0	1	1	0
0	34	5	34.7143	1900	23	38	1	1	0	0	0	0	37039.9	0	0	0	0	0	0	0	23	1	1	0	0	1	1	0
1	36	6	36.8571	2850	3	37.5714	0	1	0	0	0	0	5141.07	0	0	0	0	0	0	0	27	1	0	0	0	1	0	0
0	36	6	36.8571	4300	8	38	0	1	0	0	0	0	11265.4	0	0	0	0	0	0	0	35	0	0	1	0	0	1	0
0	36	6	36.8571	2660	4	37.7143	0	1	0	0	0	0	6116.01	0	0	0	0	0	0	0	29	0	0	0	0	0	0	0
0	35	3	35.4286	2120	9	36.7143	0	1	0	0	0	0	11462.1	0	0	0	0	0	0	0	38	0	1	1	0	1	1	0
1	35	2	35.2857	1930	12	37	0	1	1	0	0	0	14205.3	0	0	0	0	0	0	1	34	0	0	0	0	0	1	0
0	33	3	33.4286	1240	51	40.7143	1	1	1	0	0	1	99233.5	0	0	0	0	0	0	1	24	1	0	0	0	1	1	1
0	33	3	33.4286	1750	37	38.7143	1	1	0	0	0	1	77834	0	0	0	0	0	0	0	24	1	0	0	0	1	1	1
1	36	6	36.8571	2620	3	37.8571	0	1	0	0	0	0	4353.58	0	0	0	0	0	0	0	29	1	0	0	0	0	1	0
1	29	2	29.2857	1400	64	38.4286	0	1	0	0	0	0	132202	0	0	0	0	0	0	1	35	0	0	0	0	0	1	0
1	36	6	36.8571	2190	9	38.1429	1	1	1	0	0	0	11048.8	0	0	0	0	0	0	1	28	0	1	0	0	0	1	0
1	36	6	36.8571	2130	9	38.1429	1	1	1	0	0	0	10928	0	0	0	0	0	0	1	28	0	1	0	0	0	1	0
0	33	3	33.4286	2270	13	35.2857	0	1	0	0	0	0	23434.1	0	0	0	0	0	0	0	31	0	0	0	0	0	0	0
0	34	6	34.8571	2100	12	36.5714	0	1	0	0	0	0	21982.5	0	0	0	0	0	0	0	30	1	0	0	0	1	1	0
0	36	5	36.7143	3050	11	38.2857	0	1	0	0	0	0	21408.9	0	0	0	0	0	0	0	39	0	0	0	0	0	1	0
1	35	3	35.4286	2800	9	36.7143	0	1	0	0	0	0	16838.3		0	0		0	0	0	44	0	0	0	0	0	0	0
0	34	3	34.4286	1570	28	38.4286	0	1	1	0	0	0	62891.9	0	1	0	0	0	0	1	35	0	1	1	0	1	1	0
1	34	3	34.4286	2090	14	36.4286	1	1	0	0	0	0	24418	0	0	0	0	0	0	0	35	0	1	1	0	1	1	0
1	31	5	31.7143	1530	52	39.1429	0	1	0	0	0	1	139137	0	0	0	0	1	1	0	29	1	1	0	0	1	1	0
1	35	2	35.2857	2420	13	37.1429	0	1	0	0	0	0	22795.5	0	0	0	0	0	0	0	33	1	0	0	0	1	0	0
0	32	5	32.7143	2080	26	36.4286	0	1	0	0	0	0	40371.3	0	0	0	0	0	0	0	31	0	0	0	0	1	1	0
1	36	5	36.7143	2540	6	37.5714	0	1	0	0	0	0	8917.63	0	0	0	0	0	0	0	33	0	0	1	0	0	0	0
0	33	3	33.4286	1860	20	36.2857	0	1	0	0	0	1	43704.9	0	0	0	0	0	0	0	37	0	0	1	0	0	0	0
0	36	5	36.7143	2430	8	37.8571	0	1	0	0	0	0	15483.3	0	0	0	0	0	0	1	33	1	0	1	1	0	0	0
0	35	6	35.8571	2770	10	37.2857	0	1	0	0	0	0	16369.9	0	0	0	0	0	0	0	38	1	0	0	0	0	0	0
0	33	1	33.1429	1540	37	38.4286	0	1	0	0	0	1	72078.8	0	0	0	0	1	0	1	29	0	0	0	0	0	1	0
0	36	5	36.7143	2510	4	37.5714	0	1	0	0	0	0	5748.34	0	0	0	0	0	0	0	36	0	1	0	0	0	1	0
0	35	6	35.8571	2780	9	37.1429	0	1	0	0	0	0	14601.5	0	0	0	0	0	0	0	26	1	0	0	0	0	0	0
1	31	4	31.5714	1980	33	36.2857	0	1	0	0	0	1	92232.5	1	0	0	0	0	0	0	43	0	1	0	0	0	1	0
0	31	0	31	1350	49	38	0	1	0	0	0	1	89591.6	0	0	1	0	1	0	1	29	0	0	0	0	1	1	1
1	34	2	34.2857	2120	13	36.1429	0	1	0	0	0	0	24135.7	0	0	0	0	0	0	0	29	0	0	0	0	1	1	0
0	25	1	25.1429	680	96	38.8571	0	1	0	0	0	1	231553	0	0	1	0	1	0	1	27	1	0	0	0	1	0	0
0	31	0	31	1150	51	38.2857	0	1	0	0	0	0	97745.2	0	0	0	0	0	0	1	28	1	1	0	0	1	1	0
1	34	5	34.7143	1930	11	36.2857	1	1	0	0	0	0	18464	0	0	0	0	0	0	1	36	0	0	0	0	0	1	0
1	34	5	34.7143	1970	11	36.2857	1	1	0	0	0	0	18353.1	0	0	0	0	0	0	1	36	0	0	0	0	0	1	0
1	34	4	34.5714	1770	16	36.8571	0	1	1	0	0	0	27852.5	0	0	0	0	0	0	1	30	1	1	0	0	1	1	0
1	35	4	35.5714	2060	12	37.2857	0	1	1	0	0	0	20317.7	0	0	0	0	0	0	1	30	1	0	0	0	0	0	0
1	34	0	34	1930	15	36.1429	0	1	0	0	0	0	24607.6	0	0	0	0	0	0	0	28	1	1	0	0	0	1	0
0	36	2	36.2857	2460	11	37.8571	0	1	0	0	0	0	22445.9	0	0	0	0	0	0	0	31	1	0	1	0	0	1	0
1	34	0	34	2050	15	36.1429	0	1	0	0	0	0	26269.2	0	0	0	0	0	0	0	30	0	0	0	0	1	0	1
1	31	2	31.2857	1700	41	37.1429	1	1	0	1	0	1	80734.4	1	0	0	0	0	1	1	25	0	0	0	0	0	1	0
1	31	2	31.2857	1590	41	37.1429	1	1	0	1	0	1	78690.3	0	0	0	0	1	0	1	25	0	0	0	0	0	1	0
1	36	0	36	2260	6	36.8571	0	1	0	0	0	0	10558.7	0	0	0	0	0	0	1	29	1	0	1	0	0	1	0
0	36	0	36	2890	5	36.7143	1	1	0	0	0	0	7229.96	0	0	0	0	0	0	0	34	1	0	0	1	1	1	0
0	33	5	33.7143	2140	10	35.1429	0	1	0	0	0	0	17795	0	0	0	0	0	0	0	31	0	0	0	0	1	1	0
1	36	2	36.2857	2000	14	38.2857	0	1	1	0	0	1	47811.1	0	0	0	0	0	0	1	31	0	1	0	0	0	1	0
0	36	0	36	2090	10	37.4286	0	1	1	0	0	0	16432	0	0	0	0	0	0	1	30	1	0	0	0	0	1	0
1	28	5	28.7143	1280	54	36.4286	0	1	0	0	0	1	112114	0	0	0	0	0	0	0	33	1	0	1	0	1	1	1
1	36	5	36.7143	2950	6	38	0	1	0	0	0	0	8090.12	0	0	0	0	0	0	0	35	1	0	1	0	0	0	0
0	36	6	36.8571	2550	4	37.7143	0	1	0	0	0	0	6149.11	0	0	0	0	0	0	0	27	1	0	0	0	0	0	0
0	34	6	34.8571	2890	7	35.8571	0	1	0	0	0	0	14401.1	0	0	0	0	0	0	0	27	0	0	0	0	1	1	0
0	28	2	28.2857	740	66	37.7143	0	1	1	0	0	1	156894	0	0	1	0	0	1	0	27	1	1	1	0	1	1	0
1	35	3	35.4286	2810	11	37	0	1	0	0	0	0	22174	0	0	0	0	0	0	0	21	0	0	0	0	0	1	0
0	32	3	32.4286	2160	24	35.8571	0	1	0	0	0	0	39081.6	0	0	0	0	0	0	0	34	0	0	0	0	1	1	0
0	34	5	34.7143	2440	13	36.5714	0	1	0	0	0	0	21143.4	0	0	0	0	0	0	0	34	0	0	1	0	1	0	1
0	36	3	36.4286	1830	16	38.7143	0	1	1	0	0	0	29545.7	0	0	0	0	0	0	0	37	0	0	1	0	0	1	0
1	34	2	34.2857	2070	13	36.1429	0	1	0	0	0	0	21697.4	0	0	0	0	0	0	0	26	1	1	0	0	0	0	0
1	35	1	35.1429	2230	9	36.4286	0	1	0	0	0	0	16356.6	0	0	0	0	0	0	0	33	0	0	0	0	1	0	0
0	32	1	32.1429	1170	51	39.4286	0	1	1	0	0	1	107861	0	0	0	0	0	0	1	32	0	1	0	0	0	1	0
1	36	6	36.8571	2760	7	38.1429	0	1	0	0	0	0	9809.62	0	0	0	0	0	0	0	25	0	0	0	0	0	1	0
0	36	3	36.4286	2500	6	37.2857	0	1	0	0	0	0	12809.7	0	0	0	0	0	0	0	28	0	0	1	0	0	1	0
0	33	5	33.7143	1750	16	36	1	1	0	0	0	0	25243.2	0	0	0	0	0	0	0	28	1	0	0	0	0	1	0
0	33	5	33.7143	1860	16	36	1	1	0	0	0	0	27976.2	0	0	0	0	0	0	0	28	1	0	0	0	0	1	0
1	28	0	28	1000	101	42.4286	0	1	0	1	0	1	221166	0	0	1	0	1	1	0	35	0	0	1	1	0	1	1
1	36	2	36.2857	2820	9	37.5714	0	1	0	0	0	0	11055.5	0	0	0	0	0	0	0	37	0	1	1	0	0	1	0
0	36	0	36	2730	7	37.4286	1	1	0	0	0	0	8357.99	0	0	0	0	0	0	0	26	1	0	0	0	1	1	0
1	33	6	33.8571	1650	21	36.8571	0	0	1	0	0	0	35219.4	0	0	0	0	0	0	1	27	1	0	0	0	0	1	0
1	36	0	36	2240	10	37.7143	1	1	0	0	0	0	10070	0	0	0	0	0	0	1	26	1	0	0	0	1	1	0
1	36	3	36.4286	2370	8	37.5714	0	1	0	0	0	0	16262.9	0	0	0	0	0	0	1	43	0	0	0	0	0	0	0
1	33	4	33.5714	1900	20	36.4286	0	1	0	1	0	1	37417.4	0	0	0	0	0	0	1	40	0	0	1	0	0	1	1
1	35	6	35.8571	2450	9	37.1429	1	1	0	0	0	0	16826.6	0	0	0	0	0	0	0	30	1	0	0	0	1	1	0
0	35	6	35.8571	2250	9	37.1429	1	1	0	0	0	0	15555.2	0	0	0	0	0	0	1	30	1	0	0	0	1	1	0
0	36	3	36.4286	2490	9	37.7143	0	1	0	0	0	0	9225.14	0	0	0	0	0	0	0	35	1	0	1	0	0	0	1
0	36	1	36.1429	1780	16	38.4286	1	1	1	0	0	0	25379.7	0	0	0	0	0	0	0	33	0	1	0	0	0	1	0
0	36	1	36.1429	2170	8	37.2857	1	1	1	0	0	0	13740.8	0	0	0	0	0	0	1	33	0	1	0	0	0	1	0
0	31	3	31.4286	1670	42	37.4286	0	1	0	0	0	0	70114.9	0	0	0	0	1	0	0	32	0	0	0	0	0	1	1
1	36	0	36	2990	7	37	0	1	0	0	0	0	12184.5	0	0	0	0	0	0	0	29	0	1	1	0	0	1	0
0	36	5	36.7143	2820	6	38.1429	0	1	0	0	0	0	9825.94	0	0	0	0	0	0	0	32	1	0	0	0	0	1	0
1	36	4	36.5714	2890	13	38.4286	0	1	0	1	0	0	23208.9	0	0	0	0	0	0	0	29	0	0	1	0	0	1	0
1	35	4	35.5714	2640	9	36.8571	1	1	0	0	0	0	16217.5	0	0	0	0	0	0	0	34	0	0	0	0	1	1	0
1	36	3	36.4286	3210	15	38.5714	0	1	0	0	0	0	17719.3	0	0	0	0	0	0	0	35	1	0	0	0	0	1	0
1	35	2	35.2857	2500	9	36.5714	0	1	0	0	0	0	16836.3	0	0	0	0	0	0	0	26	0	0	0	0	0	0	0
1	35	5	35.7143	2400	9	37	1	1	0	0	0	0	15790.9	0	0	0	0	0	0	1	30	1	0	0	0	0	1	0
0	35	5	35.7143	2190	9	37	1	1	0	0	0	0	15653.8	0	0	0	0	0	0	1	30	1	0	0	0	0	1	0
1	28	3	28.4286	1050	64	37.5714	0	1	0	1	0	1	151170	0	0	1	0	0	0	0	30	1	0	0	0	0	1	0
0	30	0	30	1370	52	37.4286	0	1	0	0	0	0	91987.5	0	0	0	0	0	0	0	39	0	0	0	0	1	0	1
0	36	4	36.5714	3140	4	37.7143	0	1	0	0	0	0	5819.34	0	0	0	0	0	0	0	26	0	0	0	0	0	1	0
0	35	3	35.4286	2320	11	37	0	1	0	0	0	0	13686.7	0	0	0	0	0	0	1	29	0	0	0	0	1	1	0
0	36	4	36.5714	1730	15	38.7143	0	1	1	0	0	0	21906.8	0	0	0	0	0	0	1	30	0	0	1	0	1	0	0
1	25	0	25	840	141	45.1429	0	1	0	1	0	1	407361	0	0	1	1	1	0	0	36	0	0	0	0	1	1	0
0	34	4	34.5714	1770	14	36.5714	1	1	0	0	0	0	20661.5	0	0	0	0	0	0	1	43	0	0	0	0	0	1	0
0	34	4	34.5714	2090	11	36.1429	1	1	0	0	0	0	21423.5	0	0	0	0	0	0	0	43	0	0	0	0	0	1	0
0	36	2	36.2857	2680	4	37.4286	1	1	0	0	0	0	6960.02	0	0	0	0	0	0	0	30	1	0	1	0	0	1	0
1	36	4	36.5714	1830	20	39.4286	0	1	1	0	0	0	28451.5	0	0	0	0	0	0	1	25	1	0	0	0	0	0	0
0	36	4	36.5714	2030	8	37.7143	1	1	1	0	0	0	11105.9	0	0	0	0	0	0	1	31	0	0	0	0	1	1	0
0	33	2	33.2857	1970	12	35	0	1	0	0	0	0	20156.8	0	0	0		0	0	0	32	0	0	0	0	1	0	0
1	35	5	35.7143	2850	9	37	0	1	0	0	0	0	16697	0	0	0	0	0	0	0	27	1	0	0	0	0	1	0
0	36	2	36.2857	2160	6	37.1429	1	1	1	0	0	0	8706.89	0	0	0	0	0	0	0	30	1	0	1	0	0	1	0
1	35	2	35.2857	2540	12	37	1	1	0	0	0	0	19671.6	0	0	0	0	0	0	0	39	1	0	0	0	0	1	0
1	35	2	35.2857	2170	8	36.4286	1	1	0	0	0	0	12912.6	0	0	0	0	0	0	0	39	1	0	0	0	0	1	0
1	35	3	35.4286	2600	9	36.7143	0	1	0	0	0	0	14631.9	0	0	0	0	0	0	0	31	0	0	0	0	1	0	1
1	36	2	36.2857	2440	4	37.4286	1	1	0	0	0	0	6299.44	0	0	0	0	0	0	1	33	1	1	0	0	1	1	0
1	36	2	36.2857	2310	7	37.2857	1	1	0	0	0	0	8688.38	0	0	0	0	0	0	1	31	1	0	0	1	0	1	0
1	36	2	36.2857	2850	9	37.5714	1	1	0	1	0	0	19639.8	0	0	0	0	0	0	0	33	1	1	0	0	1	1	0
1	35	4	35.5714	2340	10	37	0	1	0	0	0	0	14885.2	0	0	0	0	0	0	0	35	1	1	0	0	0	1	0
0	33	5	33.7143	1940	17	36.1429	0	1	0	0	0	0	23741.3	0	0	0	0	0	0	0	39	0	0	0	0	0	1	0
1	35	0	35	2500	11	36.5714	0	1	0	0	0	0	20791.3	0	0	0	0	0	0	0	26	1	1	1	0	0	0	0
1	34	3	34.4286	2220	12	36.1429	0	1	0	0	0	0	19269.8	0	0	0	0	0	0	0	33	0	0	0	0	0	0	0
1	27	3	27.4286	1090	71	37.5714	0	1	0	0	0	1	158736	0	0	1	0	0	1	0	33	1	0	1	0	1	0	1
1	36	1	36.1429	2070	9	37.4286	1	1	1	0	0	0	12982	0	0	0	0	0	0	1	32	0	0	0	0	0	1	0
1	36	0	36	2620	9	37.2857	0	1	0	0	0	0	11964.8	0	0	0	0	0	0	0	28	1	0	1	0	0	0	0
1	36	6	36.8571	1700	15	39	0	1	1	0	0	0	22637.2	0	0	0	0	0	0	1	27	1	1	0	0	0	1	0
1	34	4	34.5714	2370	11	36.1429	0	1	0	0	0	0	16058.8	0	0	0	0	0	0	0	28	1	1	0	0	1	1	0
0	36	0	36	2050	7	37	0	1	1	0	0	0	13769.9	0	0	0	0	0	0	1	36	1	1	1	0	0	1	0
1	34	2	34.2857	1630	22	37.4286	0	1	1	0	0	0	34493.3	0	0	0	0	0	0	1	27	1	1	0	0	1	1	0
0	34	6	34.8571	2170	11	36.4286	0	1	0	0	0	0	19343.2	0	0	0	0	0	0	0	17	1	0	0	0	1	1	1
1	34	3	34.4286	2540	12	36.1429	1	1	0	0	0	0	20542.6	0	0	0	0	0	0	0	43	1	1	0	1	1	1	0
1	36	2	36.2857	2520	6	37.4286	0	1	0	0	0	0	10496.9	0	0	0	0	0	0	1	23	1	0	0	0	0	0	0
0	33	5	33.7143	2590	24	37.1429	0	1	0	0	0	0	37046.7	0	0	0	0	0	0	0	38	1	0	1	0	1	1	0
1	35	6	35.8571	2040	7	36.8571	0	1	1	0	0	0	4861.39	0	0	0	0	0	0	0	32	1	0	0	0	0	0	0
1	35	6	35.8571	3050	6	36.7143	0	1	0	0	0	0	11432.6	0	0	0	0	0	0	0	30	0	0	1	0	0	1	0
1	34	0	34	1910	23	37.2857	0	1	0	0	0	0	31725.9	0	0	0	0	1	0	1	30	0	0	1	0	0	1	0
0	24	6	24.8571	700	117	41.5714	0	1	1	0	0	1	250304	0	0	0	1	1	0	0	37	0	0	1	0	0	0	0
1	34	1	34.1429	2090	14	36.1429	0	1	0	0	0	0	21468.8	0	0	0	0	0	0	0	32	1	0	0	0	0	1	0
0	30	0	30	1560	46	36.5714	0	1	0	0	0	1	75004	0	0	0	0	0	0	0	24	1	0	0	0	1	1	0
0	34	5	34.7143	2260	10	36.1429	0	1	0	0	0	0	18265.1	0	0	0	0	0	0	0	38	1	0	0	0	0	0	0
1	34	4	34.5714	2540	10	36	0	1	0	0	0	0	20988.2	0	0	0	0	0	0	0	37	0	0	0	0	0	1	0
0	34	2	34.2857	2310	15	36.4286	1	1	0	0	0	0	25628	0	0	0	0	0	0	0	31	1	0	0	0	0	1	0
0	34	2	34.2857	2120	15	36.4286	1	1	0	0	0	0	22389.1	0	0	0	0	0	0	0	31	1	0	0	0	0	1	0
1	32	5	32.7143	1930	27	36.5714	0	1	0	0	0	1	57634.3	0	0	0	0	0	0	0	33	0	1	0	0	1	1	0
0	33	1	33.1429	1560	32	37.7143	1	1	0	0	0	0	52973.6	0	0	0	0	0	0	1	36	0	0	0	0	0	1	0
0	33	1	33.1429	1580	27	37	1	1	0	0	0	0	44118.6	0	0	0	0	0	0	1	36	0	0	0	0	0	1	0
1	36	2	36.2857	2660	6	37.1429	0	1	0	0	0	0	10766.1	0	0	0	0	0	0	0	25	1	0	0	1	0	1	1
1	35	2	35.2857	2430	15	37.4286	0	1	0	0	0	0	24785.7	0	0	0	0	0	0	1	40	1	0	0	1	1	1	0
1	31	2	31.2857	1880	30	35.5714	0	1	0	0	0	0	43013.4	0	0	0	0	0	0	0	38	0	0	0	0	0	0	0
1	31	5	31.7143	1740	40	37.4286	0	1	0	0	0	1	83799.3	0	0	0	0	0	0	0	39	0	1	0	0	1	1	0
1	33	5	33.7143	1230	57	41.8571	1	1	1	0	0	1	96210.3	0	0	0	0	0	1	1	24	1	1	0	0	1	1	0
1	33	5	33.7143	1920	16	36	1	1	0	0	0	1	37265.7	0	0	0	0	0	0	1	24	1	1	0	0	1	1	0
1	35	0	35	1870	17	37.4286	0	1	1	0	0	0	27120.8	0	0	0	0	1	0	1	38	0	1	0	0	1	1	0
0	31	5	31.7143	1230	57	39.8571	0	1	0	1	0	0	97858.7	0	1	0	0	0	0	0	34	0	1	0	0	1	1	0
1	35	1	35.1429	2860	7	36.1429	0	1	0	0	0	0	9618.21	0	0	0	0	0	0	0	35	0	1	1	0	1	1	0
1	36	5	36.7143	2840	6	37.5714	0	1	0	0	0	0	12849.7	0	0	0	0	0	0	0	26	0	0	1	0	0	1	0
1	34	4	34.5714	2680	11	36.1429	0	1	0	0	0	0	17897.7	0	0	0	0	0	0	0	39	1	0	1	0	1	1	0
0	34	1	34.1429	1880	14	36.1429	1	1	0	0	0	0	20682.4	0	0	0	0	0	0	1	35	1	0	1	0	0	1	0
0	34	1	34.1429	1880	14	36.1429	1	1	0	0	0	0	20909.8	0	0	0	0	0	0	1	35	1	0	1	0	0	1	0
0	33	6	33.8571	2080	20	36.7143	0	1	0	0	0	0	32140.3	0	0	0	0	0	0	0	24	1	0	0	1	0	1	0
1	33	0	33	2040	14	35	0	1	0	0	0	1	35483	0	0	0	0	0	0	0	32	1	0	0	1	0	0	0
0	34	5	34.7143	2380	11	36.2857	0	1	0	0	0	0	18458.8	0	0	0	0	0	0	0	31	0	0	0	0	1	1	0
0	33	5	33.7143	1930	14	35.7143	1	1	0	0	0	0	24295.1	0	0	0	0	0	0	0	27	1	0	0	0	1	1	1
0	33	5	33.7143	1870	14	35.7143	1	1	0	0	0	0	24641.5	0	0	0	0	0	0	0	27	1	0	0	0	1	1	1
1	30	2	30.2857	1670	55	38.1429	0	1	0	1	0	1	107576	0	0	0	0	1	0	0	28	1	0	0	0	0	1	0
1	34	4	34.5714	1720	31	39	0	1	1	0	0	0	49904.6	0	0	0	0	0	0	1	31	0	1	0	0	1	1	0
1	36	0	36	3950	7	37	0	1	0	0	0	0	13422.2	0	0	0	0	0	0	0	39	0	0	1	0	0	1	0
1	35	3	35.4286	2370	20	38.2857	0	1	0	0	0	0	31188.6	0	0	0	0	0	0	0	38	1	0	0	0	1	0	0
0	34	0	34	1970	28	38	0	1	0	0	0	1	98145.1	0	0	0	0	0	0	1	25	1	0	0	0	1	1	1
0	32	2	32.2857	1550	34	37.1429	1	1	0	0	0	1	72856.3	0	0	0	0	0	1	1	27	1	0	0	0	0	0	0
0	32	2	32.2857	1670	34	37.1429	1	1	0	0	0	1	79867.3	0	0	0	0	0	1	0	27	1	0	0	0	0	0	0
0	36	2	36.2857	2510	4	37.5714	0	1	0	0	0	0	7395.04	0	0	0	0	0	0	0	30	1	0	0	0	0	0	0
1	34	5	34.7143	2240	11	36.2857	0	1	0	0	0	0	17738.7	0	0	0	0	0	0	0	31	0	1	0	0	1	1	0
0	35	5	35.7143	2120	10	37.1429	0	1	0	0	0	0	18854.7	0	0	0	0	0	0	1	32	0	1	0	0	0	1	0
0	36	5	36.7143	2730	7	37.7143	0	1	0	0	0	0	11844.3	0	0	0	0	0	0	0	27	1	0	1	0	0	1	0
1	35	1	35.1429	2520	12	36.8571	0	1	0	0	0	0	21988.4	0	0	0	0	0	0	0	30	1	0	0	0	0	1	1
0	30	6	30.8571	1660	40	36.5714	1	1	0	0	0	0	68710.9	0	0	0	0	0	0	0	27	0	1	0	0	1	1	1
0	30	6	30.8571	1180	40	36.5714	1	1	1	0	0	0	63600.1	0	0	0	0	0	0	1	27	0	1	0	0	1	1	1
1	30	5	30.7143	1400	47	37.4286	0	1	0	0	0	1	86746.2	0	0	1	0	0	0	1	33	1	1	0	0	1	1	0
1	33	0	33	1640	25	36.5714	0	1	0	0	0	0	44019.7	0	0	0	0	0	0	1	37	1	1	1	0	0	0	1
1	25	5	25.7143	690	100	40	0	1	0	0	0	1	235215	0	0	1	0	1	1	1	33	0	0	1	0	0	1
0	30	6	30.8571	1350	50	38	0	1	0	0	0	1	111447	0	1	0	0	0	0	0	30	0	0	1	0	1	1	1
1	36	2	36.2857	2170	7	37.2857	0	1	1	0	0	0	14108.6	0	0	0	0	0	0	1	43	0	0	0	0	1	0	0
1	34	1	34.1429	2310	8	35.2857	0	1	0	0	0	0	15766.4	0	0	0	0	0	0	0	22	1	0	0	0	1	1	1
0	32	3	32.4286	1520	26	36.1429	0	1	0	0	0	1	47091.4	0	0	0	0	0	0	0	33	1	1	0	0	1	1	0
0	33	1	33.1429	1940	17	35.5714	0	1	0	1	0	0	27185.7	0	0	0	0	0	0	0	34	1	0	1	0	1	1	0
1	36	3	36.4286	2260	9	37.7143	1	1	0	0	0	0	16734	0	0	0	0	0	0	1	30	1	0	1	0	1	1	0
1	34	0	34	2090	19	36.7143	1	1	0	0	0	0	27440.7	0	0	0	0	0	0	1	29	1	0	0	0	1	1	0
0	34	0	34	2060	19	36.7143	1	1	0	0	0	0	27641.1	0	0	0	0	0	0	1	29	1	0	0	0	1	1	0
0	35	0	35	2520	10	36.4286	0	1	0	0	0	0	16358	0	0	0	0	0	0	0	32	0	0	0	0	0	0	0
0	35	4	35.5714	2650	10	37	0	1	0	0	0	0	17128.1	0	0	0	0	0	0	0	41	1	1	1	0	1	1	0
1	30	6	30.8571	1520	44	37.1429	0	1	0	1	1	1	111045	0	0	0	0	0	0	0	26	0	0	0	0	1	1	0
1	34	4	34.5714	2070	11	36.1429	0	1	0	0	0	0	19280.3	0	0	0	0	0	0	1	30	0	0	0	0	0	1	0
1	34	0	34	2350	19	36.7143	0	1	0	0	0	0	27666.7	1	0	0	0	0	0	0	37	0	0	1	0	0	0	1
1	35	2	35.2857	2470	11	36.8571	1	1	0	0	0	0	18285.9	0	0	0	0	0	0	0	31	0	0	0	0	0	1	0
0	35	2	35.2857	2340	11	36.8571	1	1	0	0	0	0	16620.5	0	0	0	0	0	0	0	31	0	0	0	0	0	1	0
1	35	1	35.1429	2080	17	37.5714	0	1	0	0	0	0	28761.3	0	0	0	0	0	0	1	28	1	1	0	0	0	1	0
1	35	6	35.8571	2410	10	37.2857	0	1	0	0	0	0	15627.8	0	0	0	0	0	0	1	29	1	1	0	0	0	1	0
1	36	2	36.2857	2290	8	37.4286	0	1	0	0	0	0	11450	0	0	0	0	0	0	1	39	0	0	0	0	1	1	0
1	36	4	36.5714	2890	6	37.4286	0	1	0	0	0	0	13198.8	0	0	0	0	0	0	0	29	1	0	0	0	0	0	0
0	36	3	36.4286	2340	8	37.5714	1	1	0	0	0	0	14097.6	0	0	0	0	0	0	1	28	1	0	0	0	0	1	0
0	36	3	36.4286	2040	8	37.5714	1	1	1	0	0	0	14142.4	0	0	0	0	0	0	1	28	1	0	0	0	0	1	0
1	34	2	34.2857	2320	13	36.1429	0	1	0	0	0	0	20990.2	0	0	0	0	0	0	0	29	0	0	0	0	0	0	0
1	34	6	34.8571	2540	12	36.5714	0	1	0	0	0	0	18899.7	0	0	0	0	0	0	0	35	0	0	0	0	0	1	0
0	36	5	36.7143	2650	9	38	0	1	0	0	0	0	17132.6	0	0	0	0	0	0	0	37	1	0	1	0	1	1	0
0	34	5	34.7143	2000	18	37.2857	0	1	0	0	0	0	26587.5	0	0	0	0	0	0	0	30	1	1	0	0	1	1	0
1	32	1	32.1429	1680	27	36	1	1	0	0	0	1	53691.2	0	0	0	0	0	0	0	28	1	0	1	0	1	1	0
1	32	1	32.1429	1940	27	36	1	1	0	0	0	1	52095.1	0	0	0	0	0	0	0	28	1	0	1	0	1	1	0
1	35	3	35.4286	2650	10	36.8571	1	1	0	0	0	0	17161.6	0	0	0	0	0	0	0	29	1	0	1	0	0	1	0
1	35	3	35.4286	2500	10	36.8571	1	1	0	0	0	0	16927.3	0	0	0	0	0	0	0	29	1	0	1	0	0	1	0
1	33	6	33.8571	2450	11	35.4286	0	1	0	0	0	0	18344.2	0	0	0		0	0	0	30	1	0	1	0	1	0	0
0	36	4	36.5714	3290	8	37.7143	0	1	0	0	0	0	13657.9	0	0	0	0	0	0	0	33	0	0	1	0	0	1	0
0	34	5	34.7143	2950	9	36	0	1	0	0	0	0	16097.9	0	0	0	0	0	0	0	33	0	1	1	0	0	1	0
0	35	4	35.5714	1990	13	37.4286	0	1	1	0	0	0	24105.5	0	0	0	0	0	0	1	24	1	0	0	0	0	1	0
0	36	0	36	2240	7	37.4286	0	1	0	0	0	0	11273.9	0	0	0		0	0	1	30	1	0	0	0	0	0	0
0	36	3	36.4286	3100	3	37.4286	1	1	0	0	0	0	5905.48	0	0	0	0	0	0	0	35	0	0	1	0	0	1	0
1	35	4	35.5714	2440	12	37.2857	1	1	0	0	0	0	18654.6	0	0	0	0	0	0	0	25	0	0	0	0	1	1	0
1	35	4	35.5714	2510	12	37.2857	1	1	0	0	0	0	17213	0	0	0	0	0	0	0	25	0	0	0	0	1	1	0
0	36	2	36.2857	2000	8	37.4286	1	1	1	0	0	0	12142.8	0	0	0	0	0	0	1	32	1	0	0	0	0	1	0
0	36	2	36.2857	2400	8	37.4286	1	1	0	0	0	0	12724.5	0	0	0	0	0	0	0	32	1	0	0	0	0	1	0
1	36	3	36.4286	3180	3	37.1429	1	1	0	0	0	0	6544.28	0	0	0	0	0	0	0	35	0	0	1	0	0	1	0
0	36	1	36.1429	2600	7	37.1429	0	1	0	0	0	0	12631.2	0	0	0	0	0	0	0	31	0	0	0	0	0	1	0
1	36	2	36.2857	3020	8	37.4286	0	1	0	0	0	0	13844.6	0	0	0	0	0	0	0	35	0	0	0	0	0	1	0
0	36	6	36.8571	3250	8	38.1429	0	1	0	0	0	0	11892	0	0	0	0	0	0	0	36	0	0	1	0	0	1	0
1	34	0	34	2160	14	36	0	1	0	0	0	0	22236.7	0	0	0		0	0	0	34	0	0	1	0	0	0	0
0	33	6	33.8571	1950	16	36.1429	0	1	0	0	0	0	22378.9	0	0	0	0	0	0	1	28	0	0	0	0	1	0	0
0	33	6	33.8571	2130	10	35.2857	0	1	0	0	0	0	18079.7	0	0	0	0	0	0	0	31	1	0	1	0	1	0	1
1	36	4	36.5714	2840	7	37.5714	1	1	0	0	0	0	11722.1	0	0	0	0	0	0	0	33	0	0	0	0	0	1	0
1	35	0	35	2110	10	36.4286	1	1	0	0	0	0	17241.9	0	0	0	0	0	0	1	37	0	0	0	0	0	1	0
0	35	0	35	2110	10	36.4286	1	1	0	0	0	0	17510.8	0	0	0	0	0	0	1	37	0	0	0	0	0	1	0
1	35	4	35.5714	2800	6	36.7143	0	1	0	0	0	0	4501.16	0	0	0	0	0	0	0	35	0	0	1	0	0	0	0
0	35	6	35.8571	2660	8	37	0	1	0	0	0	0	14116.1	0	0	0	0	0	0	0	36	0	0	0	0	0	1	0
0	35	5	35.7143	2580	11	37.2857	0	1	0	0	0	0	16026.8	0	0	0	0	0	0	0	31	0	0	1	0	0	0	0
1	31	6	31.8571	1560	34	36.7143	1	1	0	0	0	1	58663.8	0	0	0	0	0	0	0	25	0	0	0	0	1	1	1
1	31	6	31.8571	1610	34	36.7143	1	1	0	0	0	1	66680.9	0	0	0	0	0	0	1	25	0	0	0	0	1	1	1
1	33	6	33.8571	2100	15	36	1	1	0	0	0	0	23580.1	0	0	0	0	0	0	0	29	0	0	1	0	0	1	1
1	33	6	33.8571	2170	15	36	1	1	0	0	0	0	25373.8	0	0	0	0	0	0	0	29	0	0	1	0	0	1	1
1	35	6	35.8571	2870	20	38.7143	1	1	0	0	0	0	32009.1	0	0	0	0	0	0	0	29	1	1	0	0	1	1	0
1	35	6	35.8571	2220	19	38.5714	1	1	0	0	0	0	36931	0	0	0	0	0	0	1	29	1	1	0	0	1	1	0
0	35	5	35.7143	2250	11	37.2857	0	1	0	0	0	0	16853.4	0	0	0	0	0	0	0	28	0	0	0	0	0	0	1
0	36	6	36.8571	3830	9	38.1429	0	1	0	0	0	0	14398.5	0	0	0		0	0	0	27	1	1	1	0	0	1	0
0	30	4	30.5714	1060	51	37.8571	0	1	0	0	0	1	96558.7	0	0	0	0	0	0	1	28	1	1	0	0	1	1	0
1	36	1	36.1429	2570	10	37.5714	1	1	0	0	0	0	19009.3	0	0	0	0	0	0	0	39	0	0	0	0	1	0	0
1	36	1	36.1429	2340	10	37.5714	1	1	0	0	0	0	17332.9	0	0	0	0	0	0	1	39	0	0	0	0	1	0	0
1	33	6	33.8571	2060	9	35.1429	0	1	0	0	0	0	15810.5	0	0	0		0	0	0	37	0	0	0	0	0	1	1
0	36	0	36	2100	9	37.2857	0	1	0	0	0	0	15133.9	0	0	0	0	0	0	1	33	1	0	1	0	0	0	0
0	36	1	36.1429	2680	5	36.8571	0	1	0	0	0	0	9781.55	0	0	0	0	0	0	0	33	0	0	1	0	1	1	0
1	34	1	34.1429	2480	26	37.8571	0	1	0	0	0	0	36674.3	0	0	0	0	0	0	0	38	0	0	0	0	1	0	0
1	35	3	35.4286	2270	11	37	1	1	0	0	0	0	17615.1	0	0	0	0	0	0	1	34	1	0	0	0	0	1	0
0	35	3	35.4286	2390	11	37	1	1	0	0	0	0	17662.7	0	0	0	0	0	0	0	34	1	0	0	0	0	1	0
1	36	2	36.2857	2700	6	37.2857	0	1	0	0	0	0	10997.3	0	0	0	0	0	0	0	28	1	0	0	0	0	0	0
0	36	0	36	3090	7	37	0	1	0	0	0	0	12722.4	0	0	0	0	0	0	0	36	0	0	1	0	0	1	0
1	36	2	36.2857	2330	5	37.2857	1	1	0	0	0	0	8497.68	0	0	0	0	0	0	1	49	1	0	1	0	0	1	0
1	36	2	36.2857	2470	5	37.2857	1	1	0	0	0	0	8580.76	0	0	0	0	0	0	1	49	1	0	1	0	0	1	0
1	36	3	36.4286	3250	6	37.2857	0	1	0	0	0	0	11316.9	0	0	0	0	0	0	0	33	1	0	0	0	0	1	1
0	32	2	32.2857	1640	34	37.1429	0	1	0	1	0	1	85576.6	0	0	0	0	0	0	0	30	0	0	0	0	0	1	0
1	35	1	35.1429	2510	12	36.8571	0	1	0	0	0	0	19580	0	0	0	0	0	0	1	34	0	0	0	0	0	1	1
0	34	2	34.2857	1950	13	36.1429	0	1	0	0	0	0	21283.2	0	0	0	0	0	0	1	34	1	0	0	0	1	1	1
1	26	0	26	900	79	37.2857	0	1	0	1	0	1	185415	0	0	1	0	1	1	0	35	0	0	1	0	1	1	0
1	36	4	36.5714	2430	3	37.5714	0	1	0	0	0	0	6858.62	0	0	0		0	0	1	40	0	0	0	0	0	0	0
1	29	4	29.5714	1250	51	36.8571	1	1	0	0	0	0	87325.7	0	0	0	0	0	0	0	34	0	0	0	0	1	1	1
0	29	4	29.5714	1360	51	36.8571	1	1	0	0	0	0	85292.4	0	0	0	0	0	0	0	34	0	0	0	0	1	1	1
1	36	1	36.1429	2800	5	36.8571	0	1	0	0	0	0	9528.2	0	0	0	0	0	0	0	35	0	0	0	0	0	1	0
0	34	6	34.8571	2430	11	36.4286	0	1	0	0	0	0	17496.3	0	0	0	0	0	0	0	26	1	0	0	0	0	0	0
0	36	3	36.4286	3230	5	37.1429	0	1	0	0	0	0	8987.41		0	0		0	0	0	33	0	0	1	0	0	1	0
1	34	4	34.5714	1700	24	37.1429	0	1	1	0	0	0	13268.3	0	0	0	0	0	0	0	34	0	1	0	0	0	1	0
0	36	3	36.4286	2040	9	37.4286	0	1	1	0	0	0	16721.3	0	0	0	0	0	0	0	31	1	1	1	0	0	1	0
0	29	3	29.4286	1210	82	38.5714	0	1	0	0	0	1	203504	0	0	0	0	1	1	0	29	1	0	1	0	0	1	1
1	33	4	33.5714	1420	25	37.5714	1	1	1	0	0	0	36711.9	0	0	0	0	0	0	0	38	1	1	0	0	1	1	0
1	33	3	33.4286	1810	23	35.5714	1	1	0	0	0	0	34550.5	0	0	0	0	0	0	0	38	1	1	0	0	1	1	0
0	33	4	33.5714	1630	23	37.4286	1	1	0	0	0	0	32497.7	0	0	0	0	0	0	1	38	1	1	0	0	1	1	0
0	35	3	35.4286	2170	8	37.8571	0	1	0	0	0	0	13083.3	0	0	0	0	0	0	1	27	0	0	0	0	0	0	0
0	34	4	34.5714	2450	13	35.7143	0	1	0	0	0	0	21214.4	0	0	0	0	0	0	0	36	0	0	0	0	1	1	0
1	32	3	32.4286	1830	37	36.5714	0	1	0	0	0	1	77622.5	0	0	0	0	0	0	0	33	0	0	1	0	1	1	1
1	35	3	35.4286	2650	9	36.5714	0	1	0	0	0	0	17038.4	0	0	0	0	0	0	0	32	1	0	1	0	0	0	0
1	33	4	33.5714	2340	14	37.4286	0	1	0	0	0	0	20308.7	0	0	0	0	0	0	0	43	0	1	0	0	1	1	0
1	34	4	34.5714	2280	10	35.5714	1	1	0	0	0	0	17205	0	0	0	0	0	0	0	31	1	0	0	0	0	1	0
1	34	3	34.4286	2400	10	36.8571	1	1	0	0	0	0	16220.7	0	0	0	0	0	0	0	31	1	0	0	0	0	1	0
0	32	4	32.5714	1430	38	37.7143	1	1	0	1	0	1	64572.5	0	0	0	0	0	0	0	35	0	1	0	0	1	1	0
0	32	3	32.4286	1670	29	36.5714	1	1	0	0	0	1	56435.2	0	0	0	0	0	0	1	35	0	1	0	0	1	1	0
1	34	4	34.5714	1690	20	36	1	1	0	0	0	0	33614.4	0	0	0	0	0	0	0	26	1	1	1	0	1	1	0
1	34	3	34.4286	1910	11	35.2857	1	1	0	0	0	0	23613.1	0	0	0		0	0	0	26	1	1	1	0	1	1	0
1	34	4	34.5714	1990	11	37.7143	1	1	0	0	0	0	21146.5	0	0	0		0	0	1	26	1	1	1	0	1	1	0
1	27	3	27.4286	940	87	36	0	1	1	0	0	1	200809	0	0	0	0	1	0	0	38	0	0	0	0	0	1	0
1	36	4	36.5714	2260	14	36.5714	0	1	1	0	0	0	20953.6	0	0	0	0	0	0	0	41	0	0	0	0	0	1	0
1	34	3	34.4286	2140	16	37.8571	0	1	0	0	0	0	27393.6	0	0	0	0	1	0	1	31	0	0	0	0	0	0	0
0	33	4	33.5714	1340	35	35.1429	1	1	1	0	0	0	53588.2	0	0	0	0	0	0		31	1	0	1	0	1	1	0
0	33	3	33.4286	1870	22	37.5714	1	1	0	0	0	0	35131.9	0	0	0	0	0	0	1	31	1	0	1	0	1	1	0
1	35	3	35.4286	2350	15	37.1429	0	1	0	0	0	0	20022.1	0	0	0	0	0	0	0	33	0	1	1	0	0	1	0
1	36	4	36.5714	2660	7	37.4286	1	1	0	0	0	0	11023.5		0	0	0	0	0	0	35	1	1	0	0	0	1	0
1	36	4	36.5714	1970	9	37.4286	1	1	1	0	0	0	14264.6	0	0	0	0	0	0	0	29	1	0	1	0	1	1	0
1	34	3	34.4286	2800	15	37.2857	0	1	0	0	0	0	26237.4	0	0	0	0	0	0	0	23	1	1	1	0	0	1	0
1	33	4	33.5714	1860	19	37.5714	0	1	0	0	0	0	26582.5	0	0	0	0	0	0		24	1	0	0	0	1	1	0
1	27	3	27.4286	1050	87	37.7143	0	1	0	0	0	1	181303	1	0	1	1	0	0		34	0	0	1	0	1	1	1
1	36	4	36.5714	1980	11	36.2857	0	1	1	0	0	0	16851.1	0	0	0	0	0	0	0	32	1	1	0	0	0	1	0
0	36	0	36	1890	12	37.7143	1	1	1	0	0	0	18650.9	0	0	0	0	0	0	1	29	0	1	0	0	1	1	0
0	34	5	34.7143	2630	14	36.7143	0	1	0	0	0	0	19916.5	0	0	0	0	0	0	0	24	1	0	0	0	0	1	0
0	36	2	36.2857	1990	13	38.1429	1	1	1	0	0	0	18148.8	0	0	0	0	0	0	1	34	1	0	0	0	1	1	0
1	36	6	36.8571	3120	3	37.8571	0	1	0	0	0	0	7116.19	0	0	0	0	0	0	0	33	0	0	0	0	0	1	0
1	31	3	31.4286	1190	42	37.4286	0	1	1	0	0	1	87084.1	0	0	0	0	0	1	1	30	1	1	0	0	1	1	0
0	34	6	34.8571	2120	9	36.1429	0	1	0	0	0	0	17258.2	0	0	0	0	0	0	0	30	1	0	0	0	1	0	1
0	33	4	33.5714	2510	12	35.2857	0	1	0	0	0	0	17328.6	0	0	0	0	0	0	0	32	0	1	0	0	1	1	0
1	26	3	26.4286	1110	84	38.4286	1	1	0	0	0	1	173310	1	0	1	0	0	0	0	34	0	0	1	0	0	0	0
1	26	3	26.4286	1100	67	36	1	1	0	0	0	1	144156	0	0	1	0	0	0	0	34	0	0	1	0	0	0	0
1	35	0	35	2210	11	36.5714	0	1	0	0	0	0	17072.4	0	0	0	0	0	0	1	29	0	0	0	0	0	1	0
1	35	3	35.4286	2900	8	36.5714	1	1	0	0	0	0	13686.4	0	0	0	0	0	0	0	36	0	0	0	0	0	1	0
0	35	3	35.4286	2790	8	36.5714	1	1	0	0	0	0	12874	0	0	0	0	0	0	0	36	0	0	0	0	0	1	0
1	35	1	35.1429	2070	12	36.8571	0	1	0	1	0	0	23293.5	0	0	0	0	0	0	1	33	1	1	0	0	1	1	0
0	36	6	36.8571	2740	8	38	1	1	0	0	0	0	13881.7	0	0	0	0	0	0	0	31	0	1	0	0	0	1	0
0	36	6	36.8571	2660	7	37.8571	1	1	0	0	0	0	11674.3	0	0	0	0	0	0	0	31	0	1	0	0	0	1	0
0	29	3	29.4286	1250	47	36.1429	0	1	0	0	0	1	101701	0	0	0	0	0	0	0	31	1	0	0	0	0	1	0
1	30	3	30.4286	1920	36	35.5714	0	1	0	1	1	1	71530	0	0	0	0	0	0	0	32	0	0	1	0	1	1	0
1	30	5	30.7143	1020	54	38.4286	0	1	1	0	0	1	103947	0	0	0	0	0	1	1	26	1	0	0	0	1	1	0
1	35	0	35	2460	8	36.1429	1	1	0	0	0	0	14973.6	0	0	0	0	0	0	0	32	0	0	0	0	0	1	0
1	35	0	35	2110	8	36.1429	1	1	0	0	0	0	15083.9	0	0	0	0	0	0	1	32	0	0	0	0	0	1	0
0	28	4	28.5714	1300	62	37.4286	0	1	0	0	0	1	138132	0	0	1	0	0	1	0	32	0	0	0	0	1	0	1
0	35	4	35.5714	2590	9	36.8571	1	1	0	0	0	0	14500.9	0	0	0	0	0	0	0	29	0	1	0	0	1	1	0
1	36	0	36	2510	8	37.1429	1	1	0	0	0	0	14197.9	0	0	0	0	0	0	0	35	0	0	0	0	0	1	0
1	36	0	36	2780	8	37.1429	1	1	0	0	0	0	16886.5	0	0	0	0	0	0	0	35	0	0	0	0	0	1	0
0	34	3	34.4286	1850	18	37	0	1	0	0	0	1	47333.6	0	0	0	0	0	0	1	38	0	0	1	0	0	0	0
0	34	6	34.8571	2960	12	36.5714	0	1	0	0	0	0	16883.7	0	0	0	0	0	0	0	32	1	1	0	0	0	1	0
1	35	6	35.8571	3260	7	36.8571	0	1	0	0	0	0	12831.1	0	0	0		0	0	0	30	1	1	1	0	0	1	0
0	36	5	36.7143	3670	9	38	0	1	0	0	0	0	15182	0	0	0	0	0	0	0	28	0	0	1	0	0	1	0
1	31	2	31.2857	990	46	37.8571	0	1	1	0	0	1	88367.3	0	0	0	0	0	0	1	34	0	1	0	0	1	1	0
0	36	2	36.2857	3570	6	37.1429	0	1	0	0	0	0	10984.5	0	0	0	0	0	0	0	30	0	0	1	0	0	0	0
1	35	6	35.8571	2250	5	37.4286	1	1	0	0	0	0	8503.24	0	0	0	0	0	0	0	35	0	0	0	0	1	1	0
1	34	2	34.2857	2530	14	36.2857	0	1	0	0	0	0	29880.4	0	0	0	0	0	0	0	36	1	1	1	0	0	1	0
1	26	0	26	750	85	38.1429	1	0	1	1	1	1	178007	0	0	1	0	0	0	1	36	1	0	1	0	0	1	0
1	35	6	35.8571	2560	6	37.4286	1	1	0	0	0	0	10333.2	0	0	0	0	0	0	0	35	0	0	0	0	1	1	0
0	34	1	34.1429	1800	17	36.5714	0	1	0	0	0	0	25073.7	0	0	0	0	0	0	1	34	0	1	0	0	1	1	1
1	36	4	36.5714	3000	7	37.5714	0	1	0	0	0	0	12821.5	0	0	0	0	0	0	0	34	1	0	0	1	0	1	0
0	32	2	32.2857	1650	35	37.2857	0	1	0	0	0	0	56589.1	0	0	0	0	0	0	0	30	0	1	0	0	0	1	0
0	36	6	36.8571	4230	5	37.5714	0	1	0	0	0	0	9309.08	0	0	0	0	0	0	0	28	0	1	1	0	0	1	0
1	35	3	35.4286	3030	11	37	0	1	0	0	0	0	22006.2	0	0	0	0	0	0	0	26	1	0	1	0	0	0	0
1	34	6	34.8571	2730	14	36.8571	0	1	0	0	0	0	30217.4	0	0	0	0	0	0	0	37	0	0	0	0	0	1	0
1	36	6	36.8571	2700	7	37.8571	0	1	0	0	0	0	13038.6	0	0	0	0	0	0	0	34	1	0	0	0	0	0	0
1	28	5	28.7143	960	50	35.8571	0	1	0	0	0	1	99280.3	0	0	0	0	1	1	1	34	0	0	0	0	1	0	0
1	36	0	36	2340	8	37.1429	0	1	0	0	0	0	15208.8	0	0	0	0	0	0	0	30	1	0	1	0	0	0	0
0	31	5	31.7143	1460	33	36.4286	0	1	0	0	0	0	64594.7	0	0	0	0	0	0	0	30	1	0	0	0	1	1	1
0	35	2	35.2857	3260	8	36.4286	0	1	0	0	0	0	13818	0	0	0	0	0	0	0	37	0	0	1	0	1	0	0
0	34	4	34.5714	2500	10	36	0	1	0	0	0	0	15862.7	0	0	0	0	0	0	0	29	1	0	0	0	0	0	0
1	35	4	35.5714	2710	8	36.7143	0	1	0	0	0	0	14808.2	0	0	0	0	0	0	0	27	0	0	0	0	0	0	0
1	31	1	31.1429	1150	38	36.5714	0	1	1	0	0	1	72670.5	0	0	0	0	0	0	1	31	0	1	0	0	1	1	0
0	33	2	33.2857	2080	16	35.5714	1	1	0	0	0	0	25566.2	0	0	0	0	0	0	0	32	1	0	0	0	1	1	0
0	33	2	33.2857	2400	16	35.5714	1	1	0	0	0	0	25633.9	0	0	0	0	0	0	0	32	1	0	0	0	1	1	0
0	35	2	35.2857	2240	9	36.5714	1	1	0	0	0	0	15664.1	0	0	0	0	0	0	0	32	0	0	1	0	0	1	0
0	35	2	35.2857	2370	9	36.5714	1	1	0	0	0	0	15845	0	0	0	0	0	0	0	32	0	0	1	0	0	1	0
1	33	4	33.5714	2090	19	36.2857	0	1	0	0	0	0	32919.7	0	0	0	0	0	0	0	33	0	0	0	0	0	1	1
1	35	2	35.2857	2340	15	37.4286	1	1	0	0	0	0	22383.2	0	0	0	0	0	0	0	32	1	1	0	0	1	1	0
1	35	2	35.2857	2700	15	37.4286	1	1	0	0	0	0	40453	0	0	0	0	0	0	0	32	1	1	0	0	1	1	0
1	36	2	36.2857	3010	8	37.4286	0	1	0	0	0	0	14650.7	0	0	0	0	0	0	0	32	0	0	0	0	1	1	0
0	36	6	36.8571	2820	10	38.2857	0	1	0	0	0	0	21358.4	0	0	0	0	0	0	0	25	1	0	0	0	0	0	0
1	30	1	30.1429	1290	42	36.1429	1	1	0	1	0	0	82038.6	0	0	0	0	0	0	1	27	1	0	1	0	1	1	0
1	30	1	30.1429	1520	38	35.5714	1	1	0	0	0	1	85067.1	0	0	0	0	0	0	0	27	1	0	1	0	1	1	0
0	24	3	24.4286	700	100	38.7143	0	1	0	0	0	1	257052	0	0	1	1	1	0	0	36	1	0	0	0	1	0	0
1	34	2	34.2857	1990	11	35.8571	0	1	0	0	0	0	19858.8	0	0	0	0	0	0	0	28	1	0	0	0	0	1	0
0	35	6	35.8571	2240	10	37.2857	0	1	0	0	0	0	16584.8	0	0	0	0	0	0	1	28	1	0	0	0	1	0	0
1	36	1	36.1429	2750	7	37.1429	0	1	0	0	0	0	12369.6	0	0	0	0	0	0	0	42	1	0	0	1	0	0	1
0	35	3	35.4286	2760	8	36.5714	0	1	0	0	0	0	15142.3	0	0	0	0	0	0	0	33	0	0	1	0	1	0	0
1	34	6	34.8571	2330	9	36.1429	0	1	0	0	0	0	13815.1	0	0	0	0	0	0	0	30	1	0	0	0	0	0	1
1	31	6	31.8571	2100	18	34.4286	0	1	0	0	0	0	28131.1	0	0	0		0	0	0	39	0	0	0	0	1	1	1
0	34	5	34.7143	2300	7	35.7143	0	1	0	0	0	0	13623.1	0	0	0	0	0	0	0	35	0	0	1	0	0	1	0
1	29	2	29.2857	1300	44	35.5714	0	1	0	1	0	0	107890	0	0	1	0	0	0	0	34	1	0	0	0	1	1	1
1	35	0	35	2250	12	36.7143	0	1	0	0	0	0	18042.5	0	0	0	0	0	0	0	41	1	0	1	0	0	1	0
0	33	6	33.8571	1750	21	36.8571	0	1	0	0	0	0	29151.5	0	0	0	0	0	0	1	31	0	0	0	0	1	0	1
1	36	4	36.5714	2770	10	38	1	1	0	0	0	0	14290	0	0	0	0	0	0	0	36	0	0	0	0	0	1	0
1	36	4	36.5714	2940	10	38	1	1	0	0	0	0	16718.5	0	0	0	0	0	0	0	36	0	0	0	0	0	1	0
1	34	2	34.2857	2270	18	36.8571	0	1	0	0	0	0	24566.5	0	0	0	0	0	0	0	39	0	0	1	0	0	1	0
1	35	4	35.5714	2170	15	37.7143	0	1	0	0	0	0	21366.6	0	0	0	0	0	0	1	31	1	0	1	0	0	1	1
1	35	6	35.8571	2900	7	36.8571	0	1	0	0	0	0	11191.5	0	0	0		0	0		26	0	0	0	0	1	0	0
1	33	0	33	2040	22	36.1429	0	1	0	1	0	0	45467.8	0	0	0	0	0	0	0	36	0	0	0	0	1	1	1
1	36	1	36.1429	2930	9	37.4286	0	1	0	0	0	0	14497.7	0	0	0		0	0	0	37	0	0	1	0	0	1	0
1	28	5	28.7143	1190	57	36.8571	1	1	0	0	0	1	131567	0	0	0	0	0	0	0	27	1	0	0	0	1	1	0
1	28	5	28.7143	1220	57	36.8571	1	1	0	0	0	1	130392	0	0	1	0	0	1	0	27	1	0	0	0	1	1	0
0	34	2	34.2857	2560	8	35.4286	0	1	0	0	0	0	13815.4	0	0	0	0	0	0	0	24	1	0	1	0	0	1	0
0	35	3	35.4286	2050	7	36.4286	0	1	0	0	0	0	11739.5	0	0	0	0	0	0	0	31	1	0	0	0	1	1	0
0	34	2	34.2857	2520	6	35.1429	0	1	0	0	0	0	10581.5		0	0		0	0	0	29	1	0	0	0	0	1	0
0	36	4	36.5714	2040	9	37.8571	0	1	1	0	0	0	17635.1	0	0	0	0	0	0	1	30	1	0	0	0	0	1	0
0	34	6	34.8571	2670	11	36.4286	0	1	0	0	0	0	18051.1	0	0	0	0	0	0	0	36	0	0	1	0	1	1	0
1	35	6	35.8571	2490	13	37.7143	0	1	0	0	0	0	20753.6	0	0	0	0	0	0	0	33	1	0	1	0	0	1	0
1	34	3	34.4286	2310	12	36.1429	0	1	0	0	0	0	20843.4	0	0	0	0	0	0	0	31	1	0	0	0	1	0	1
1	35	0	35	2580	15	37.1429	0	1	0	0	0	0	22688	0	0	0	0	0	0	0	32	0	0	0	0	1	0	0
0	35	1	35.1429	2210	9	36.4286	0	1	0	0	0	0	15509.7	0	0	0	0	0	0	0	31	1	1	0	0	0	1	0
1	31	2	31.2857	1930	26	35	0	1	0	0	0	1	49585.2	0	0	0	0	0	0	0	34	0	0	1	0	1	0	1
1	35	2	35.2857	2600	8	36.4286	0	1	0	0	0	0	15172.4	0	0	0	0	0	0	0	31	0	0	0	0	0	0	1
1	28	6	28.8571	1300	44	35.1429	0	0	0	0	0	1	111677	0	0	0	0	0	0	0	29	0	0	0	0	0	0	0
1	36	0	36	2070	12	37.7143	0	1	1	0	0	0	19585.8	0	0	0	0	0	0	1	30	1	0	0	0	1	0	0
1	35	0	35	2630	7	36	0	1	0	0	0	0	12813.7	0	0	0	0	0	0	0	28	1	0	1	0	0	1	0
1	34	4	34.5714	2380	9	35.8571	0	1	0	0	0	0	17703.8	0	0	0	0	0	0	1	27	0	0	0	0	0	0	0
0	30	5	30.7143	1420	44	37	0	1	0	0	0	0	81984.9	0	0	0	0	0	0	1	33	0	0	0	0	1	1	0
1	34	1	34.1429	2090	13	36	0	1	0	0	0	0	20757.7	0	0	0	0	0	0	1	30	1	0	0	0	0	0	0
1	34	6	34.8571	2290	14	36.8571	0	1	0	0	0	1	44996.7	0	0	0	0	0	1	0	28	0	0	0	0	1	1	1
1	36	3	36.4286	1870	9	37.7143	0	1	1	0	0	0	15207.7	0	0	0	0	0	0	1	36	0	0	0	0	0	1	0
1	35	3	35.4286	2500	8	36.5714	0	1	0	0	0	0	14601.5	0	0	0	0	0	0	0	33	1	0	1	1	1	1	0
1	36	6	36.8571	3420	7	37.8571	0	1	0	0	0	0	13008.4	0	0	0	0	0	0	0	38	1	0	1	0	0	1	0
1	34	3	34.4286	2000	13	36.2857	0	1	0	0	0	0	20633.8	0	0	0	0	0	0	1	38	0	0	1	0	0	1	1
0	36	0	36	1960	12	37.7143	1	1	1	0	0	0	17209.9	0	0	0	0	0	0	1	37	1	0	0	0	0	1	0
0	36	0	36	2540	10	37.4286	1	1	0	0	0	0	17224.1	0	0	0	0	0	0	0	37	1	0	0	0	0	1	0
1	31	3	31.4286	1650	29	35.5714	0	1	0	0	0	1	65732.4	0	0	0	0	0	1	0	30	1	0	0	0	1	1	1
0	33	3	33.4286	2050	24	36.8571	0	1	0	0	0	0	35173	0	0	0	0	0	0	1	32	1	0	0	0	1	1	0
1	33	5	33.7143	2080	9	35	0	1	0	0	0	0	13531.5	0	0	0		0	0	1	33	0	0	1	0	1	0	0
1	31	4	31.5714	1300	49	38.5714	0	1	0	0	0	0	91504.4	0	0	0	0	0	0	1	19	1	0	1	0	1	1	0
1	35	0	35	1880	17	37.4286	1	1	1	0	0	0	24225	0	0	0	0	0	0	1	39	0	0	0	0	0	1	0
1	35	0	35	2120	12	36.7143	1	1	0	0	0	0	17821.9	0	0	0	0	0	0	1	39	0	0	0	0	0	1	0
1	35	0	35	1620	12	36.7143	1	1	1	0	0	0	17802.7	0	0	0	0	0	0	1	39	0	0	0	0	0	1	0
0	36	0	36	2960	6	36.8571	0	1	0	0	0	0	14203.2	0	0	0	0	0	0	0	34	0	0	0	0	1	1	0
0	33	6	33.8571	2520	8	35	0	1	0	0	0	0	14723.7	0	0	0	0	0	0	0	37	0	0	0	0	1	1	1
0	31	6	31.8571	1440	33	36.5714	0	1	0	0	0	0	48574.5	0	0	0	0	0	0	1	32	1	0	1	0	1	0	1
1	34	6	34.8571	2230	13	36.7143	1	1	0	0	0	0	21780.5	0	0	0	0	0	0	0	31	0	0	1	0	1	1	0
1	34	6	34.8571	2450	8	36	1	1	0	0	0	0	15103	0	0	0	0	0	0	0	31	0	0	1	0	1	1	0
0	33	1	33.1429	1870	22	36.2857	0	1	0	0	0	0	32352.9	0	0	0	0	0	0	0	39	0	1	0	0	1	1	0
0	36	2	36.2857	3030	8	37.4286	0	1	0	0	0	0	15673	0	0	0	0	0	0	0	30	0	0	0	0	0	0	1
0	32	1	32.1429	1530	61	40.8571	1	1	0	0	0	1	122985	0	0	0	0	0	0	0	29	1	0	0	0	0	1	0
0	32	1	32.1429	1540	41	38	1	1	0	0	0	0	9909.64	0	0	0	0	0	0	1	29	1	0	0	0	0	1	0
1	36	6	36.8571	2230	7	37.8571	0	1	0	0	0	0	11730.1	0	0	0	0	0	0	1	25	1	0	1	0	0	0	1
1	35	1	35.1429	2070	11	36.7143	0	1	0	0	0	0	19566.4	0	0	0	0	0	0	1	32	0	1	0	0	1	1	0
1	34	4	34.5714	2000	8	35.7143	0	1	0	0	0	0	14730.4	0	0	0	0	0	0	0	31	0	0	0	0	0	0	0
0	36	6	36.8571	2720	4	37.8571	0	1	0	0	0	0	8367.11	0	0	0	0	0	0	0	33	0	0	0	0	0	0	0
0	36	0	36	2350	9	37.2857	1	1	0	0	0	0	16143.2	0	0	0	0	0	0	0	42	0	0	0	0	0	1	0
0	36	0	36	2320	9	37.2857	1	1	0	0	0	0	16435.4	0	0	0	0	0	0	0	42	0	0	0	0	0	1	0
1	33	1	33.1429	1990	24	36.5714	0	1	0	0	0	0	48223.8	0	0	0	0	0	0	1	39	0	0	0	0	1	1	1
0	34	6	34.8571	1800	16	37.1429	0	1	1	0	0	0	24719.4	0	0	0	0	0	0	1	35	0	1	1	0	0	1	0
1	35	4	35.5714	2600	9	36.8571	0	1	0	0	0	0	13802	0	0	0	0	0	0	0	39	0	0	0	0	0	1	0
1	36	6	36.8571	2950	10	38.2857	0	1	0	0	0	1	40519	0	0	0	0	0	0	0	32	0	0	0	0	0	1	0
0	34	4	34.5714	1960	20	37.4286	0	1	0	0	0	0	28675.9	0	0	0	0	0	0	1	30	1	1	0	0	1	1	0
1	34	4	34.5714	2100	9	35.8571	0	1	0	0	0	0	16453.7	0	0	0	0	0	0	1	28	1	0	0	0	0	1	1
0	34	6	34.8571	2430	13	36.7143	0	1	0	0	0	0	19443.6	0	0	0	0	0	0	0	36	1	0	0	0	0	1	0
0	34	6	34.8571	2330	13	36.7143	0	1	0	0	0	0	20172.6	0	0	0	0	0	0	0	36	1	0	0	0	0	1	0
1	36	4	36.5714	2120	9	37.8571	0	1	1	0	0	0	15845	0	0	0	0	0	0	1	35	0	0	0	0	0	0	0
1	36	2	36.2857	3210	5	37.2857	0	1	0	0	0	0	7711.43	0	0	0	0	0	0	0	28	0	0	1	0	0	0	0
1	36	4	36.5714	2640	7	37.7143	0	1	0	0	0	0	13459.6	0	0	0		0	0	0	32	1	0	0	0	0	1	0
0	32	3	32.4286	1610	41	38.2857	1	1	0	0	0	1	78101.6	0	0	0	0	1	0	1	32	1	0	0	0	0	1	0
0	32	3	32.4286	1630	28	36.4286	1	1	0	0	0	0	50073	0	0	0	0	0	0	0	32	1	0	0	0	0	1	0
1	34	1	34.1429	2480	10	35.5714	0	1	0	0	0	0	19011.6	0	0	0	0	0	0	0	34	1	0	0	0	0	0	0
0	29	1	29.1429	860	55	37	1	1	0	0	0	1	119474	0	0	0	0	0	0	1	32	1	0	0	0	0	1	1
0	29	1	29.1429	910	55	37	1	1	0	0	0	1	126428	0	0	0	0	0	0	1	32	1	0	0	0	0	1	1
1	36	2	36.2857	2540	5	37	1	1	0	0	0	0	10770.6	0	0	0	0	0	0	1	31	1	0	0	0	0	1	0
1	35	5	35.7143	2430	11	37.2857	0	1	0	0	0	0	18167.6	0	0	0	0	0	0	0	27	1	0	0	0	0	1	0
0	29	4	29.5714	1100	54	37.2857	0	1	0	0	0	0	104620	0	0	0	0	0	0	0	36	1	0	0	0	1	1	0
1	35	4	35.5714	2860	6	36.4286	0	1	0	0	0	0	13667.6	0	0	0	0	0	0	0	35	0	0	0	0	0	1	0
1	35	1	35.1429	2550	7	36.1429	0	1	0	0	0	0	13599	0	0	0	0	0	0	0	30	1	0	1	0	1	0	1
1	33	3	33.4286	2360	12	35.1429	0	1	0	0	0	0	19992.9	0	0	0	0	0	0	0	22	0	0	0	0	1	0	0
1	36	4	36.5714	2570	4	37.1429	0	1	0	0	0	0	8909.88	0	0	0	0	0	0	1	36	0	0	0	0	0	1	0
0	34	2	34.2857	1990	18	36.8571	0	1	0	0	0	0	25522.2	0	0	0	0	0	0	1	37	1	1	0	0	0	1	0
0	34	0	34	1710	26	37.7143	0	1	0	0	0	0	38200.8	0	0	0	0	0	0	1	28	1	0	0	0	0	0	0
0	26	1	26.1429	900	70	36.1429	0	1	0	0	0	1	161753	0	0	1	1	0	1	0	32	1	0	0	0	1	1	1
0	32	5	32.7143	1790	31	37.1429	0	1	0	0	0	0	47368.9	0	0	0	0	0	0	0	35	0	0	0	0	1	1	1
0	28	2	28.2857	1210	63	37.2857	0	1	0	0	0	1	105381	0	0	0	0	0	0	0	33	1	0	0	0	1	1	1
0	33	3	33.4286	1380	38	38.8571	0	1	1	0	0	0	49716.6	0	0	0	0	0	0	1	35	0	1	1	0	1	1	0
0	36	1	36.1429	2520	9	37.4286	0	1	0	0	0	0	16984.6	0	0	0	0	0	0	0	28	0	0	0	0	0	1	0
1	33	1	33.1429	1920	21	36.1429	0	1	0	0	0	0	27954.9	0	0	0	0	0	0	1	35	0	0	0	0	0	0	0
1	35	4	35.5714	2360	8	36.7143	0	1	0	0	0	0	14783.2	0	0	0	0	0	0	1	24	1	0	0	0	0	0	1
0	31	6	31.8571	1010	42	37.8571	0	1	1	0	0	1	71110.4	0	0	0	0	0	0	1	30	0	0	0	0	0	1	0
0	36	5	36.7143	1750	15	38.8571	0	1	1	0	0	0	27403.4	0	0	0	0	0	0	1	39	1	1	0	0	0	1	0
0	32	3	32.4286	1970	17	34.8571	0	1	0	1	0	1	66362.3	0	0	0		0	0	0	32	1	1	0	0	0	1	0
1	36	1	36.1429	2770	7	37.2857	0	1	0	0	0	0	14396.8	0	0	0	0	0	0	0	28	1	0	0	0	0	0	0
1	35	5	35.7143	2860	10	37.1429	0	1	0	0	0	0	14896.6	0	0	0	0	0	0	0	32	1	0	1	0	0	1	1
1	36	3	36.4286	2620	6	37.2857	0	1	0	0	0	0	11902.7	0	0	0	0	0	0	0	39	0	1	0	0	0	1	0
1	33	3	33.4286	1910	14	35.4286	0	1	0	0	0	0	21883.5	0	0	0		0	0	1	29	1	0	0	0	1	0	1
0	36	2	36.2857	2350	6	37.1429	1	1	0	0	0	0	12852.8	0	0	0		0	0	0	29	1	0	0	0	0	1	0
0	34	4	34.5714	2700	11	36.1429	0	1	0	0	0	0	19055.6	0	0	0		0	0	0	35	0	0	0	0	0	1	0
1	36	1	36.1429	2000	7	37.1429	1	1	0	0	0	0	12437.7	0	0	0	0	0	0	1	31	1	0	0	0	1	1	0
1	36	1	36.1429	2270	7	37.1429	1	1	0	0	0	0	13064.5	0	0	0	0	0	0	1	31	1	0	0	0	1	1	0
0	36	3	36.4286	2550	5	37.1429	1	1	0	0	0	0	11125.5	0	0	0	0	0	0	0	35	0	0	0	0	1	1	0
0	36	3	36.4286	2470	5	37.1429	1	1	0	0	0	0	10276.2	0	0	0	0	0	0	0	35	0	0	0	0	1	1	0
0	32	5	32.7143	1600	28	36.7143	0	1	0	0	0	0	43503.4	0	0	0	0	0	0	0	31	0	1	0	0	0	1	0
1	32	1	32.1429	1800	23	35.4286	0	1	0	0	0	0	54223.9	0	0	0		0	0	0	36	0	0	0	0	0	1	0
1	32	3	32.4286	1360	32	37	0	1	1	0	0	1	60177.8	0	0	0	0	0	0	1	37	0	1	0	0	1	1	0
0	36	5	36.7143	3230	5	37.4286	0	1	0	0	0	0	9749.84	0	0	0		0	0	0	39	0	0	0	0	0	1	0
1	36	1	36.1429	3090	4	36.7143	0	1	0	0	0	0	8211.59	0	0	0		0	0	0	30	1	0	1	0	0	0	0
0	36	0	36	2720	9	37.2857	0	1	0	0	0	0	19439.1	0	0	0	0	0	0	0	26	1	0	1	0	1	1	0
1	36	4	36.5714	2810	7	37.5714	0	1	0	0	0	0	12267	0	0	0	0	0	0	0	38	0	0	0	0	0	1	0
0	35	5	35.7143	2420	13	37.5714	0	1	0	0	0	0	28324.1	0	0	0	0	0	0	1	30	1	0	0	0	0	1	0
0	31	3	31.4286	1600	33	36.1429	0	1	0	1	0	0	50059.1	0	0	0	0	0	0	0	23	0	0	0	0	0	1	0
1	36	0	36	2640	6	37	0	1	0	0	0	0	11309.5	0	0	0	0	0	0	0	35	0	0	0	0	0	1	0
0	35	3	35.4286	2550	8	36.5714	1	1	0	0	0	0	15192.6	0	0	0	0	0	0	0	28	1	0	0	0	0	1	0
0	35	3	35.4286	2550	8	36.5714	1	1	0	0	0	0	14911	0	0	0	0	0	0	0	28	1	0	0	0	0	1	0
0	27	2	27.2857	1080	72	37.5714	1	1	0	0	0	0	128808	0	0	1	0	0	0	0	33	1	0	0	0	1	1	0
1	27	2	27.2857	1080	72	37.5714	1	1	0	0	0	1	135020	0	0	1	0	0	0	0	33	1	0	0	0	1	1	0
0	33	6	33.8571	2150	15	36	0	1	0	0	0	0	22147.2	0	0	0	0	0	0	0	36	0	0	0	0	0	0	0
1	36	5	36.7143	3370	7	37.7143	0	1	0	0	0	0	14372.5	0	0	0	0	0	0	0	27	1	0	0	0	0	0	0
1	24	5	24.7143	660	110	40.4286	1	1	0	1	0	1	263331	0	0	1	1	1	0	0	26	1	0	1	1	0	0	0
0	34	4	34.5714	2290	16	36.8571	0	1	0	0	0	0	9232.38	0	0	0	0	0	0	1	38	0	1	1	0	1	1	0
1	29	2	29.2857	1350	50	36.4286	0	1	0	0	0	0	104093	0	0	0	0	0	0	1	33	0	0	0	0	1	1	0
1	30	2	30.2857	1310	53	37.8571	0	1	0	0	0	0	86705.5	0	0	0	0	1	0	1	34	0	1	0	0	0	1	0
1	33	1	33.1429	1960	17	35.5714	0	1	0	0	0	0	36392.6	0	0	0		0	0	1	33	0	0	0	0	0	1	1
1	35	6	35.8571	3100	6	36.8571	0	1	0	0	0	0	10447.1	0	0	0		0	0	0	30	1	0	0	0	0	1	0
1	35	5	35.7143	2430	21	38.7143	1	1	0	0	0	0	31925.4	0	0	0	0	0	0	1	39	0	0	1	0	0	1	0
1	35	5	35.7143	2290	21	38.7143	1	1	0	0	0	0	31735	0	0	0	0	0	0	1	39	0	0	1	0	0	1	0
1	33	1	33.1429	1480	29	37.2857	0	1	1	0	0	0	38139.2	0	0	0	0	0	0	1	29	1	0	1	0	1	1	0
1	36	2	36.2857	2870	2	37.5714	1	1	0	0	0	0	4280.9		0	0		0	0	0	32	1	0	0	0	0	1	0
0	34	5	34.7143	2050	9	36	0	1	0	0	0	0	14745.2	0	0	0	0	0	0	1	35	1	1	1	0	1	1	0
0	36	4	36.5714	2580	7	37.5714	0	1	0	0	0	0	13572.2	0	0	0	0	0	0	0	39	0	1	0	0	0	1	0
1	36	1	36.1429	2430	7	37.1429	0	1	0	0	0	0	12516.3	0	0	0		0	0	1	24	1	0	0	0	0	0	0
0	31	6	31.8571	1580	33	36.5714	0	1	0	0	0	0	55487.4	0	0	0	0	0	0	0	29	0	0	0	0	0	0	1
1	35	6	35.8571	2850	7	36.8571	0	1	0	0	0	0	13943.2	0	0	0		0	0	0	32	1	1	0	0	0	1	0
1	36	2	36.2857	2930	8	37.4286	0	1	0	1	0	0	17556.3	0	0	0	0	0	0	0	26	1	0	0	0	0	0	0
1	28	6	28.8571	750	83	40.7143	1	1	1	1	0	1	176396	0	0	1	0	0	0	1	31	1	0	1	0	0	1	0
1	28	6	28.8571	1130	66	38.2857	1	1	0	0	0	1	162929	1	0	0	0	1	0	1	31	1	0	1	0	0	1	0
0	36	1	36.1429	2140	10	37.5714	0	1	1	0	0	0	20072.8	0	0	0	0	0	0	1	30	1	0	0	0	0	1	0
0	36	6	36.8571	2400	5	38.2857	0	1	0	0	0	0	10649.3		0	0		0	0	1	32	1	0	0	0	0	1	0
1	34	1	34.1429	1600	20	37	0	1	1	0	0	0	31487.2	0	0	0	0	0	0	1	27	1	0	0	0	0	1	0
1	36	2	36.2857	3250	7	37.2857	0	1	0	0	0	0	15979.5	0	0	0	0	0	0	0	32	1	0	1	0	0	1	0
0	35	0	35	2690	11	36.5714	0	1	0	0	0	0	20144.3	0	0	0	0	0	0	0	36	0	0	1	0	1	0	0
1	36	3	36.4286	3690	9	37.7143	0	1	0	0	0	0	19475.2	0	0	0	0	0	0	0	35	0	1	0	0	0	1	0
0	36	0	36	2890	7	37	0	1	0	0	0	0	12421.8	0	0	0	0	0	0	0	33	1	0	0	0	0	0	0
0	28	4	28.5714	1140	56	36.5714	0	1	0	0	0	0	96078.6	0	0	0	0	0	0	0	25	1	0	1	0	0	0	0
1	34	3	34.4286	2520	14	36.4286	0	1	0	0	0	0	42331.8	0	0	0	0	0	0	0	30	1	0	0	0	1	1	1
1	35	2	35.2857	2500	9	36.5714	0	1	0	0	0	0	36408.5	0	0	0	0	0	0	0	29	0	0	0	0	0	1	0
1	34	2	34.2857	2250	25	37.8571	1	1	0	0	0	0	36648.9	0	0	0	0	1	0	1	38	0	0	0	0	0	0	0
1	34	2	34.2857	2000	16	36.5714	1	1	0	0	0	0	24530.5	0	0	0	0	0	0	0	38	0	0	0	0	0	0	0
1	33	2	33.2857	1620	37	38.5714	1	1	0	1	0	0	92757.3	0	0	0	0	0	0	1	26	1	0	0	1	1	1	0
1	25	1	25.1429	990	81	36.7143	0	1	0	0	0	1	195540	0	0	1	0	1	0	0	28	1	0	1	0	0	0	0
1	36	2	36.2857	2840	11	37.8571	0	1	0	0	0	0	22174.7	0	0	0	0	0	0	0	35	0	0	1	0	0	1	0
1	32	4	32.5714	1980	28	36.5714	1	1	0	0	0	0	59890.7	0	0	0	0	0	0	0	30	1	0	0	0	0	1	0
1	32	4	32.5714	1810	24	36	1	1	0	0	0	0	39544.4	0	0	0	0	0	0	0	30	1	0	0	0	0	1	0
1	36	2	36.2857	2600	9	37.5714	0	1	0	0	0	0	18468.4	0	0	0	0	0	0	0	35	1	0	0	0	0	1	1
0	31	0	31	1210	54	38.7143	0	1	0	0	0	0	104286	0	0	0	0	0	0	1	31	1	1	0	0	0	1	0
1	36	4	36.5714	2690	6	37.8571	0	1	0	0	0	0	14004.2	0	0	0		0	0	0	24	1	0	0	0	0	0	0
0	36	0	36	2320	8	37.1429	0	1	0	0	0	0	16421	0	0	0	0	0	0	0	34	1	1	0	0	0	1	0
1	33	6	33.8571	2100	14	35.8571	0	1	0	0	0	0	19989.5	0	0	0	0	0	0	0	30	1	0	1	0	1	1	1
1	35	3	35.4286	2360	7	36.4286	1	1	0	0	0	0	13117.1	0	0	0	0	0	0	0	28	1	0	0	0	0	1	0
1	35	3	35.4286	2670	7	36.4286	1	1	0	0	0	0	12521		0	0	0	0	0	0	28	1	0	0	0	0	1	0
1	36	6	36.8571	2750	8	38	0	1	0	0	0	0	14349.3	0	0	0	0	0	0	0	36	0	0	1	0	0	1	0
0	36	3	36.4286	2080	17	38.8571	0	1	1	0	0	0	30912	0	0	0	0	0	0	1	31	1	0	0	0	0	0	0
1	35	2	35.2857	2350	9	36.5714	0	1	0	0	0	0	15403.7	0	0	0	0	0	0	0	35	1	0	0	0	0	1	0
0	36	4	36.5714	2250	9	37.8571	0	1	0	0	0	0	13897.2	0	0	0	0	0	0	1	31	1	0	0	0	0	0	0
0	36	2	36.2857	2780	9	37.5714	1	1	0	0	0	0	17410.3	0	0	0	0	0	0	0	34	1	0	0	0	0	1	0
1	36	2	36.2857	2410	14	38.2857	1	1	0	0	0	0	25808.4	0	0	0	0	0	0	1	34	1	0	0	0	0	1	0
1	32	2	32.2857	1570	26	36	0	1	0	0	0	0	52539.5	0	0	0	0	0	0	0	33	1	1	1	0	1	1	0
1	31	1	31.1429	1480	37	36.4286	0	1	0	0	0	1	80064.8	0	0	0	0	0	0	0	34	0	0	0	0	1	1	1
0	28	0	28	740	72	38.2857	0	1	0	1	0	0	143821	0	0	0	0	0	0	1	36	0	1	0	0	1	1	0
0	36	2	36.2857	2930	10	37.7143	0	1	0	0	0	0	28358.8	0	0	0	0	0	0	0	41	0	0	1	0	0	1	0
0	35	2	35.2857	2120	7	36.2857	1	1	0	0	0	0	14814.8	0	0	0	0	0	0	1	32	0	0	0	0	0	1	0
0	35	2	35.2857	2450	6	36.1429	1	1	0	0	0	0	12761	0	0	0	0	0	0	0	32	0	0	0	0	0	1	0
1	35	2	35.2857	2560	8	36.4286	0	1	0	0	0	0	13847.7	0	0	0	0	0	0	0	28	1	1	0	0	0	1	1
0	33	5	33.7143	2200	14	35.7143	0	1	0	0	0	0	19110.6	0	0	0	0	0	0	0	39	1	0	1	1	0	1	0
0	36	3	36.4286	2050	10	37.8571	0	1	0	0	0	0	18322.1	0	0	0	0	0	0	1	38	0	0	0	0	0	1	0
0	31	5	31.7143	1900	31	36.1429	0	1	0	0	0	0	66175.5	0	0	0	0	0	0	0	36	0	0	1	0	0	0	0
1	35	6	35.8571	2860	6	36.7143	0	1	0	0	0	0	11687.8	0	0	0	0	0	0	0	30	1	0	1	0	0	1	0
0	36	4	36.5714	2310	8	37.7143	0	1	0	0	0	0	16460.9	0	0	0		0	0	0	32	1	0	0	1	1	0	0
1	35	5	35.7143	2470	9	37	0	1	0	0	0	0	21534.1	0	0	0	0	0	0	0	34	1	0	0	0	0	1	0
0	36	4	36.5714	2860	8	37.7143	0	1	0	0	0	0	12376.2	0	0	0	0	0	0	0	34	0	0	0	0	0	1	0
1	36	5	36.7143	2730	4	37.5714	0	1	0	0	0	0	8714.3	0	0	0	0	0	0	0	32	1	0	0	0	0	0	0
0	30	0	30	1140	51	37.2857	0	1	0	0	0	0	78211.1	0	0	0	0	0	0	0	30	0	0	0	0	0	0	0
1	30	2	30.2857	920	66	39.7143	1	1	1	0	0	1	109078	0	1	0	0	1	0	1	28	1	0	0	0	1	1	0
1	30	2	30.2857	1220	45	36.7143	1	1	0	0	0	1	80855.5	0	0	0	0	0	0	1	28	1	0	0	0	1	1	0
1	35	5	35.7143	2340	10	37.1429	1	1	0	0	0	0	16736.9	0	0	0	0	0	0	0	38	0	0	0	0	0	1	0
1	35	5	35.7143	2630	10	37.1429	1	1	0	1	0	0	18823.8	0	0	0	0	0	0	0	38	0	0	0	0	0	1	0
1	35	3	35.4286	2040	11	37	0	1	0	0	0	0	16287.3	0	0	0	0	0	0	1	23	1	1	0	0	0	1	0
1	36	0	36	3050	7	37	0	1	0	0	0	0	14076.2	0	0	0	0	0	0	0	41	0	0	1	0	1	1	0
0	36	1	36.1429	2770	6	37	0	1	0	0	0	0	11459.1	0	0	0	0	0	0	0	28	1	0	0	0	0	1	0
0	26	0	26	590	98	40	0	1	0	1	1	1	206814	0	0	1	0	1	0	1	29	1	1	0	0	0	1	0
0	36	0	36	2410	16	38.2857	0	1	0	0	0	0	31188.5	0	0	0	0	1	0	1	34	1	1	0	0	0	1	0
1	33	6	33.8571	1540	41	39.7143	0	1	0	0	0	0	69010	0	0	0	0	0	0	1	28	1	1	0	0	1	1	0
0	36	3	36.4286	2580	8	38.1429	0	1	0	0	0	0	15366.8	0	0	0	0	0	0	1	37	1	0	0	0	0	1	0
0	36	0	36	3080	7	37.2857	0	1	0	0	0	0	12754.7	0	0	0	0	0	0	0	20	1	0	0	0	1	1	0
1	36	1	36.1429	2260	8	37.2857	1	1	0	0	0	0	13724	0	0	0	0	0	0	1	39	1	1	1	0	0	1	0
0	36	1	36.1429	2140	8	37.2857	1	1	0	0	0	0	12620.5	0	0	0	0	0	0	1	39	1	1	1	0	0	1	0
1	29	4	29.5714	1210	63	38.5714	0	1	0	0	0	0	116047	0	0	0	0	0	0	1	31	0	1	0	0	0	1	0
0	32	2	32.2857	1700	19	35	0	1	0	0	0	0	41345.6	0	0	0		0	0	0	31	1	0	1	0	1	0	0
1	36	0	36	2150	8	37.1429	0	1	1	0	0	0	13569.9	0	0	0	0	0	0	1	23	1	0	1	0	0	1	0
1	30	1	30.1429	1490	44	36.4286	0	1	0	0	0	0	84414.2	0	1	0	0	1	0	0	35	0	0	0	0	1	1	1
1	35	5	35.7143	2760	8	36.8571	0	1	0	0	0	0	15455.3	0	0	0	0	0	0	0	31	1	0	1	0	0	0	1
0	36	4	36.5714	2420	8	37.7143	0	1	0	0	0	0	14091.3	0	0	0	0	0	0	1	28	1	0	0	0	1	1	1
1	36	1	36.1429	2570	7	37.4286	0	1	0	0	0	0	11308.2	0	0	0	0	0	0	0	24	0	0	0	0	0	1	0
1	33	3	33.4286	2120	19	36.1429	0	1	0	0	0	1	48976.6	0	0	0	0	0	0	0	34	1	0	1	0	0	0	0
0	36	4	36.5714	2390	7	37.7143	0	1	0	0	0	0	13157.6	0	0	0	0	0	0	1	31	1	0	0	0	0	1	0
1	36	1	36.1429	2550	8	37.2857	1	1	0	0	0	0	17208.1	0	0	0	0	0	0	0	24	0	0	0	0	0	1	0
1	33	1	33.1429	1890	16	35.4286	0	1	0	0	0	0	30737.7	0	0	0	0	0	0	0	27	1	0	0	0	0	1	1
0	35	2	35.2857	1740	21	38.2857	0	1	1	0	0	0	30269.2	0	0	0	0	0	0	1	28	1	1	0	0	0	1	0
1	36	2	36.2857	2530	3	37	0	1	0	0	0	0	7218.39	0	0	0	0	0	0	0	32	1	0	0	0	0	0	0
0	35	5	35.7143	2660	8	36.8571	0	1	0	1	0	0	17600.8	0	0	0	0	0	0	0	28	0	0	0	0	0	1	0
1	33	6	33.8571	1220	38	39.2857	1	1	1	0	0	0	56366.9	0	0	0	0	0	0	1	26	1	1	0	0	1	1	0
1	33	6	33.8571	2030	19	36.5714	1	1	0	0	0	0	29354.7	0	0	0	0	0	0	1	26	1	1	0	0	1	1	0
1	34	6	34.8571	2010	15	37	0	1	0	0	0	0	26546	0	0	0	0	0	0	0	28	1	1	0	0	0	1	0
1	27	3	27.4286	1000	72	37.7143	0	1	0	1	0	1	26546	0	0	1	0	1	0	0	29	1	1	0	0	1	1	1
0	36	6	36.8571	2730	6	38.5714	0	1	0	0	0	0	10422.8	0	0	0		0	0	0	36	0	0	0	0	0	1	0
0	34	6	34.8571	1830	15	37	0	1	1	0	0	0	25687.4	0	0	0	0	0	0	1	34	0	0	0	0	0	1	0
0	32	1	32.1429	1190	46	38.7143	1	1	0	0	0	0	71634.4	0	0	0	0	0	0	1	29	1	1	1	0	1	1	0
0	32	1	32.1429	1750	28	36.1429	0	1	0	0	0	0	48828.1	0	0	0	0	0	0	0	29	1	1	1	0	1	1	0
1	28	1	28.1429	840	88	40.7143	0	1	0	0	0	1	23856.5	0	0	1	1	1	1	1	36	0	1	1	0	0	1	0
0	35	0	35	1910	21	38	0	1	1	0	0	0	30395.3	0	0	0	0	0	0	1	28	1	1	0	0	0	1	0
1	34	5	34.7143	2370	11	36.2857	0	1	0	0	0	0	19453	0	0	0	0	0	0	0	34	1	1	0	0	0	1	0
1	36	1	36.1429	2320	10	37.5714	0	1	0	0	0	0	18804.7	0	0	0	0	0	0	1	33	1	0	1	0	0	1	0
1	28	2	28.2857	1140	61	37	0	1	0	0	0	0	135960	0	0	0	0	1	0	1	37	0	0	1	0	0	1	1
0	28	2	28.2857	1020	69	38.1429	0	1	0	0	0	0	141659	0	0	0	0	1	0	1	33	0	0	1	0	1	1	1
0	36	3	36.4286	2000	10	37.8571	1	1	1	0	0	0	16203.8	0	0	0	0	0	0	1	43	1	0	1	0	1	1	0
1	36	2	36.2857	2800	5	37	0	1	0	0	0	0	11011.3	0	0	0	0	0	0	0	29	0	0	0	0	0	1	1
1	36	6	36.8571	2630	7	38.1429	0	1	0	0	0	0	12614.9	0	0	0	0	0	0	0	36	1	0	0	0	0	1	0
1	35	6	35.8571	3120	6	36.7143	0	1	0	0	0	0	13144.2	0	0	0	0	0	0	0	29	0	1	0	0	0	0	0
0	30	6	30.8571	1320	40	36.5714	0	1	0	0	0	1	89698.4	0	0	0	0	0	0	0	34	1	1	1	0	1	1	0
0	36	2	36.2857	2000	9	37.5714	0	1	1	0	0	0	17239.3	0	0	0		0	0	1	37	0	0	0	0	0	0	1
0	32	6	32.8571	2260	15	35	0	1	0	0	0	0	23884	0	0	0		0	0	0	31	0	0	0	0	1	1	1
1	36	6	36.8571	3060	9	38.4286	0	1	0	0	0	0	13500.7	0	0	0		0	0	0	39	0	0	1	0	1	0	0
0	34	5	34.7143	2250	18	37.2857	0	1	0	0	0	0	27633	1	0	0	0	0	0	0	26	1	0	0	1	1	1	0
0	32	3	32.4286	1780	24	35.8571	0	1	0	0	0	0	37627.8	0	0	0	0	0	0	0	33	0	0	0	0	1	1	1
1	36	6	36.8571	2890	3	37.7143	0	1	0	0	0	0	6181.97	0	0	0	0	0	0	0	27	1	0	1	0	1	0	1
0	29	0	29	1240	50	36.1429	1	1	0	0	0	1	109861	0	0	0	0	0	0	0	28	1	0	0	0	1	1	1
0	29	0	29	1320	50	36.1429	1	1	0	0	0	1	91540.3	0	0	0	0	0	0	0	28	1	0	0	0	1	1	1
0	33	4	33.5714	1540	25	37.1429	0	1	1	0	0	0	41839.6	0	0	0	0	0	0	1	30	0	1	1	0	0	1	0
1	36	5	36.7143	2490	11	38.2857	0	1	0	0	0	0	16220.9	0	0	0	0	0	0	1	34	1	1	1	0	0	1	0
0	35	6	35.8571	2580	8	37	0	1	0	0	0	0	12215.8	0	0	0	0	0	0	0	33	1	0	0	0	0	1	0
0	32	5	32.7143	1780	33	37.4286	1	1	0	0	0	0	58196.1	0	0	0	0	1	0	0	32	1	0	0	0	1	1	0
1	32	5	32.7143	1990	15	34.8571	1	1	0	0	0	0	22969.9	0	0	0	0	0	0	0	32	1	0	0	0	1	1	0
1	36	4	36.5714	2310	7	37.5714	0	1	0	0	0	0	14392.5	0	0	0	0	0	0	1	29	1	0	0	0	0	0	0
0	35	5	35.7143	2690	8	36.8571	0	1	0	0	0	0	15574.2	0	0	0	0	0	0	0	34	1	0	1	0	0	0	0
1	34	3	34.4286	2100	13	36.2857	0	1	0	0	0	0	20105.5	0	0	0	0	0	0	0	26	1	0	0	0	0	1	0
1	35	4	35.5714	2920	7	36.5714	0	1	0	0	0	0	11543	0	0	0	0	0	0	0	28	1	0	0	0	1	0	0
1	33	6	33.8571	2090	21	36.8571	0	1	0	0	0	0	31092.4	0	0	0	0	0	0	1	28	0	0	0	0	0	0	0
0	36	4	36.5714	2700	7	37.5714	1	1	0	0	0	0	13363.1	0	0	0	0	0	0	0	32	1	0	0	0	1	1	0
0	30	3	30.4286	1230	39	36	0	1	0	1	0	1	79287.1	0	0	0	0	0	0	0	33	0	1	0	0	1	1	0
1	36	5	36.7143	2040	8	37.8571	1	1	1	0	0	0	12959.6	0	0	0	0	0	0	1	28	1	1	1	0	0	1	0
0	36	5	36.7143	2100	8	37.8571	1	1	1	0	0	0	14247.2	0	0	0	0	0	0	1	28	1	1	1	0	0	1	0
1	30	3	30.4286	1320	50	37.5714	0	1	0	0	0	0	80700.7	0	0	0	0	0	0	0	32	1	0	1	0	0	0	0
0	33	6	33.8571	1760	18	36.4286	0	1	0	0	0	0	30040.3	0	0	0	0	0	0	1	40	1	1	0	0	1	1	0
0	34	6	34.8571	1630	26	38.5714	0	1	1	0	0	0	41897.7	0	0	0	0	0	0	1	31	1	0	0	0	1	1	0
0	35	0	35	1970	11	36.5714	1	1	0	0	0	0	17161.3	0	0	0	0	0	0	1	26	1	0	0	0	0	1	0
0	35	0	35	1940	11	36.5714	1	1	0	0	0	0	17057.5	0	0	0	0	0	0	1	26	1	0	0	0	0	1	0
1	33	3	33.4286	1770	12	35.1429	1	1	0	0	0	0	21506	0	0	0		0	0	0	19	1	1	0	0	1	1	0
1	33	3	33.4286	1980	12	35.1429	1	1	0	0	0	0	18519.1	0	0	0		0	0	0	19	1	1	0	0	1	1	0
1	30	4	30.5714	1420	42	36.5714	1	1	0	0	0	0	100463	0	0	0	0	0	0	1	29	1	0	0	0	1	1	0
1	30	4	30.5714	1540	42	36.5714	1	1	0	0	0	0	101371	0	0	0	0	0	0	0	29	1	0	0	0	1	1	0
0	35	2	35.2857	2360	6	36.1429	1	1	0	0	0	0	11652.6	0	0	0	0	0	0	0	35	1	0	0	0	0	1	0
0	35	2	35.2857	2150	6	36.1429	1	1	0	0	0	0	12877.3	0	0	0	0	0	0	0	35	1	0	0	0	0	1	0
1	35	0	35	1730	15	37.1429	1	1	1	0	0	0	30088.8	0	0	0	0	0	0	1	32	1	0	0	0	1	1	0
1	35	0	35	2540	8	36.1429	1	1	0	0	0	0	16347.4	0	0	0	0	0	0	0	32	1	0	0	0	1	1	0
0	35	0	35	2390	8	36.1429	0	1	0	0	0	0	15864.7	0	0	0	0	0	0	0	25	1	1	0	0	1	1	0
1	36	3	36.4286	1960	10	37.8571	0	1	1	0	0	0	19390.2	0	0	0	0	0	0	1	37	1	1	0	0	0	1	0
1	34	0	34	2160	14	36	0	1	0	0	0	0	36475.2	0	0	0	0	0	0	1	43	0	0	0	0	0	0	0
0	30	4	30.5714	1660	48	37.4286	1	1	0	0	0	1	124582	0	0	0	0	0	0	0	39	0	0	0	1	0	1	1
0	30	4	30.5714	1440	48	37.4286	1	1	0	0	0	1	109637	0	0	0	0	0	1	0	39	0	0	0	1	0	1	1
1	36	6	36.8571	2900	7	37.8571	0	1	0	0	0	0	14170.3	0	0	0	0	0	0	0	30	1	0	0	1	0	0	0
1	34	3	34.4286	2410	14	36.4286	1	1	0	0	0	0	23160.2	0	0	0	0	0	0	0	38	1	0	1	0	0	1	0
0	34	3	34.4286	2040	14	36.4286	1	1	0	0	0	0	22281.6	0	0	0	0	0	0	0	38	1	0	1	0	0	1	0
1	28	3	28.4286	1210	57	36.5714	0	1	0	0	0	1	114101	0	0	0	0	0	0	0	28	1	0	1	1	0	1	0
0	30	5	30.7143	1780	26	34.4286	0	1	0	0	0	0	47673.7	0	0	0	0	0	0	0	28	0	0	1	0	0	0	1
1	34	3	34.4286	2100	13	36.2857	0	1	0	1	0	0	24888.7	0	0	0	0	0	0	0	26	1	1	0	0	1	1	0
1	35	0	35	3090	9	36.2857	0	1	0	0	0	0	14134.4	0	0	0	0	0	0	0	41	0	0	1	1	1	1	0
1	34	2	34.2857	2120	10	35.7143	0	1	0	0	0	0	17406.2	0	0	0	0	0	0	0	26	1	1	1	0	1	1	0
1	35	2	35.2857	1790	18	37.8571	0	1	1	0	0	0	27344.3	0	0	0	0	0	0	1	34	0	1	0	0	0	1	0
0	30	6	30.8571	1050	58	39.1429	0	1	0	1	1	1	116314	0	0	1	0	0	0	0	27	1	1	0	0	1	1	0
1	36	4	36.5714	3170	5	38	0	1	0	0	0	0	9598.46	0	0	0		0	0	0	35	0	0	0	0	0	0	0
1	36	3	36.4286	2490	8	37.5714	0	1	0	0	0	0	14117.5	0	0	0		0	0	0	29	1	0	0	0	1	1	0
0	33	3	33.4286	2000	33	38.1429	0	1	0	0	0	1	70024.3	0	0	1	0	0	0	0	34	1	0	0	0	1	1	0
1	35	1	35.1429	2500	15	37.2857	0	1	0	0	0	0	21569.9	0	0	0		0	0	0	31	0	0	0	0	0	1	0
1	30	3	30.4286	1580	39	36	1	1	0	0	0	1	75988.1	0	0	0	0	0	0	0	36	1	1	0	0	1	1	0
0	30	3	30.4286	790	77	41.4286	1	1	1	1	0	1	153063	0	0	0	0	1	0	1	36	1	1	0	0	1	1	0
1	30	2	30.2857	1570	55	38.1429	0	1	0	0	0	1	128407	0	0	1	0	1	0	0	34	0	0	1	0	0	0	0
0	36	4	36.5714	2620	13	38.4286	0	1	0	0	0	0	21934.7	0	0	0	0	0	0	0	41	0	0	1	0	0	1	0
1	36	4	36.5714	2720	7	37.5714	0	1	0	0	0	0	13550	0	0	0	0	0	0	0	36	0	0	1	0	0	1	0
0	31	4	31.5714	1550	35	36.5714	0	1	0	0	0	1	77855.6	0	0	0	0	0	0	0	33	0	1	1	0	1	1	0
0	35	6	35.8571	2180	9	37.1429	0	1	0	0	0	0	18965.3	0	0	0	0	0	0	1	36	0	0	0	0	0	1	0
1	30	2	30.2857	1500	44	36.5714	1	1	0	0	0	1	91812.9	0	0	0	0	0	0	0	28	0	0	0	0	1	1	0
1	30	2	30.2857	1700	43	36.4286	1	1	0	0	0	1	103715	0	0	0	0	0	0	0	28	0	0	0	0	1	1	0
1	35	5	35.7143	3090	9	37	0	1	0	0	0	0	16411.9	0	0	0	0	0	0	0	29	1	0	1	0	0	0	0
0	34	3	34.4286	2260	17	36.8571	0	1	0	0	0	0	22291.4	0	0	0	0	0	0	0	27	0	0	0	0	0	1	0
1	35	6	35.8571	2560	9	37.1429	1	1	0	0	0	0	16822.9	0	0	0	0	0	0	0	33	1	0	1	0	1	1	1
0	35	6	35.8571	2170	9	37.1429	1	1	0	0	0	0	16855	0	0	0	0	0	0	1	33	1	0	1	0	1	1	1
0	27	2	27.2857	700	92	40.4286	0	1	1	0	0	1	191853	0	0	1	0	0	0	1	36	0	1	0	0	1	1	0
1	28	5	28.7143	1400	43	34.8571	0	0	0	0	0	1	86492.8	0	0	0	0	0	0	0	37	1	0	1	1	1	0	0
1	33	5	33.7143	2090	30	38	0	1	0	0	0	0	42399.9	0	0	0	0	0	0	0	32	0	0	0	0	0	1	0
1	35	0	35	2390	8	36.1429	0	1	0	0	0	0	18100.8	0	0	0	0	0	0	0	40	0	0	1	0	0	1	0
1	35	6	35.8571	2600	10	37.2857	0	1	0	0	0	0	16526.5	0	0	0	0	0	0	0	29	1	0	1	0	0	1	0
1	31	2	31.2857	1660	36	36.4286	0	1	0	0	0	1	101454	0	1	0	0	1	0	0	31	0	0	0	0	0	1	0
1	36	3	36.4286	3480	10	37.8571	0	1	0	0	0	0	15147	0	0	0	1	0	0	0	28	1	0	0	0	0	1	0
0	35	5	35.7143	2090	11	37.2857	0	1	0	0	0	0	17509.1		0	0	0	0	0	1	30	1	0	0	0	0	1	0
0	35	5	35.7143	2350	8	36.8571	0	1	0	0	0	0	14350.1	0	0	0	0	0	0	0	30	1	0	0		0	1	0
1	36	1	36.1429	2950	6	37	0	1	0	0	0	0	13769.9	0	0	0	0	0	0	0	27	1	0	0	0	0	1	0
1	34	6	34.8571	2260	12	36.5714	0	1	0	0	0	0	20282.4	0	0	0	0	0	0	0	32	1	1	0	0	0	0	0
0	30	6	30.8571	1260	42	36.8571	0	1	0	0	0	1	107726	0	0	0	0	1	0	0	43	0	1	1	0	1	1	0
1	35	4	35.5714	2660	7	36.5714	0	1	0	0	0	0	13848.2	0	0	0	0	0	0	0	32	0	0	0	0	0	0	0
1	36	3	36.4286	2160	8	37.5714	0	1	1	0	0	0	13484.9	0	0	0	0	0	0	1	24	1	1	0	0	0	1	0
1	36	6	36.8571	2350	16	39.1429	1	1	0	0	0	0	27932.4	0	0	0	0	0	0	1	29	0	0	0	0	0	0	1
0	33	6	33.8571	2350	16	36.1429	1	1	0	0	0	1	35119	0	0	0	0	0	0	0	32	1	0	0	0	1	1	0
0	33	6	33.8571	1700	19	36.5714	1	1	0	0	0	0	32697.9	0	0	0	0	0	0	1	32	1	0	0	0	1	1	0
0	30	0	30	1210	50	37.1429	1	1	0	0	0	0	109097	0	0	0	0	0	0	1	30	1	0	0	0	1	1	0
1	30	0	30	1340	44	36.2857	1	1	0	0	0	1	103419	0	1	0	0	1	0	1	30	1	0	0	0	1	1	0
0	36	2	36.2857	2280	12	38	0	1	0	0	0	0	18817.7	0	0	0	0	0	0	1	35	1	0	1	0	0	0	0
1	36	3	36.4286	3730	7	37.4286	0	1	0	0	0	0	18238	0	0	0	0	0	0	0	36	0	0	1	0	0	1	0
1	35	0	35	2160	7	36	1	1	0	0	0	0	14382.4	0	0	0	0	0	0	0	34	1	1	0	0	0	1	0
1	35	0	35	2390	7	36	1	1	0	0	0	0	12308.5	0	0	0	0	0	0	0	34	1	1	0	0	0	1	0
1	33	6	33.8571	1790	18	36.4286	0	1	0	0	0	0	33947	0	0	0	0	0	0	0	31	1	0	0	0	1	1	0
0	34	0	34	1500	26	37.7143	0	1	1	0	0	0	38240.9	0	0	0	0	0	0	1	38	0	1	1	0	0	1	0
0	27	6	27.8571	950	73	38.2857	0	1	0	1	0	0	172990	1	0	0	0	1	1	1	33	0	0	0	0	0	1	0
0	33	5	33.7143	1940	17	36.1429	0	1	0	1	0	0	46097.2	0	0	0	0	0	0	1	31	1	0	0	0	0	1	0
1	36	0	36	2690	9	37.2857	0	1	0	0	0	0	21236.4	0	0	0	0	0	0	0	32	1	1	0	0	0	1	0
1	33	0	33	2430	10	34.4286	1	1	0	0	0	0	22044.4	0	0	0	0	0	0	0	32	1	0	0	0	1	1	1
0	33	0	33	2240	10	34.4286	1	1	0	0	0	0	18695.7	0	0	0	0	0	0	0	32	1	0	0	0	1	1	1
1	36	4	36.5714	2480	5	37.7143	0	1	0	0	0	0	9142.95	0	0	0	0	0	0	0	21	1	0	0	0	0	0	0
1	33	0	33	2440	16	35.2857	0	1	0	0	0	1	41399	0	0	0	0	0	0	0	28	1	0	1	0	0	0	0
1	33	3	33.4286	2060	19	36.1429	1	1	0	0	0	0	32395.8	0	0	0	0	0	0	0	30	0	0	1		0	1	0
1	33	3	33.4286	1920	19	36.1429	1	1	0	0	0	0	36733.5	0	0	0	0	0	0	0	30	0	0	1		0	1	0
1	33	5	33.7143	2250	10	35.1429	0	1	0	0	0	0	18771.3	0	0	0		0	0	0	31	0	0	0	0	0	1	0
0	34	1	34.1429	2000	13	36	0	1	0	0	0	0	26299.8	0	0	0	0	0	0	0	34	1	0	0	0	1	1	1
1	34	3	34.4286	2550	14	36.4286	0	1	0	0	0	0	20706.4	0	0	0	0	0	0	0	31	0	0	0	0	0	0	0
0	32	0	32	1260	44	38.2857	1	1	1	0	0	0	79715.3	0	0	0	0	1	0	1	36	1	0	0	0	0	1	0
0	32	0	32	1700	32	36.5714	1	1	0	0	0	0	63264	0	0	0	0	0	0	0	36	1	0	0	0	0	1	0
0	34	0	34	2580	13	35.8571	0	1	0	0	0	1	39902.7	0	0	0	0	0	0	0	30	1	0	0	0	0	1	0
1	36	5	36.7143	2810	7	37.7143	0	1	0	0	0	0	13879.8	0	0	0		0	0	0	27	1	0	1	0	0	1	1
1	34	4	34.5714	1760	20	37.4286	1	1	1	0	0	0	31518.7	0	0	0	0	0	0	1	38	1	1	1	0	0	1	0
0	32	6	32.8571	1600	24	36.2857	0	1	0	0	0	0	40775.6	0	0	0	0	0	0	0	32	1	0	1	0	0	0	0
1	36	6	36.8571	2660	6	37.7143	0	1	0	0	0	0	10985.3	0	0	0	0	0	0	0	31	1	0	0	0	0	1	0
0	36	3	36.4286	2580	15	38.5714	0	1	0	0	0	1	55271.1	0	0	0	0	0	0	0	29	1	0	0		0	0	1
1	34	2	34.2857	2060	11	35.8571	0	1	0	0	0	0	18845	0	0	0	0	0	0	1	36	0	1	1	0	0	1	0
0	36	0	36	1720	26	39.7143	1	1	1	0	0	0	44590.2	0	0	0	0	1	0	1	27	1	0	0	0	0	1	0
0	26	0	26	810	86	38.2857	0	1	0	1	0	1	182091	0	0	1	0	0	0	1	29	1	0	0	0	1	1	0
1	35	6	35.8571	2540	17	38.2857	0	1	0	0	0	1	59506.1	0	0	0	0	0	0	0	29	1	0	0	0	0	0	1
1	34	3	34.4286	2190	23	37.7143	0	1	0	0	0	0	8373.24	0	0	0	0	0	0	0	31	1	0	1	0	0	1	0
0	36	0	36	2740	6	36.8571	0	1	0	0	0	0	12269.4	0	0	0	0	0	0	0	24	1	0	0	0	1	1	0
0	36	4	36.5714	2170	9	37.8571	0	1	1	0	0	0	15247	0	0	0	0	0	0	1	28	0	0	1	0	1	0	0
0	35	2	35.2857	2600	9	36.5714	0	1	0	0	0	0	15595.1	0	0	0	0	0	0	0	25	1	0	1	0	0	1	0
0	36	6	36.8571	2810	7	38.4286	0	1	0	0	0	0	12172.6	0	0	0		0	0	0	31	1	0	0	0	0	1	0
0	27	6	27.8571	1050	84	39.8571	1	1	0	0	0	1	207496	0	0	1	0	1	0	1	31	0	0	0	0	1	1	0
1	26	6	26.8571	1120	68	36.5714	0	1	0	1	0	0	158090	0	0	1	0	0	0	0	38	0	0	0	0	1	1	0
1	35	5	35.7143	2180	7	36.7143	0	1	0	0	0	0	12146	0	0	0	0	0	0	1	30	1	0	1	0	0	0	0
1	36	5	36.7143	2300	8	37.8571	0	1	0	0	0	0	14937.7	0	0	0	0	0	0	1	26	1	0	1	0	0	0	0
1	35	3	35.4286	2910	12	37.1429	0	1	0	0	0	0	23374.1	0	0	0	0	0	0	0	42	0	0	1	0	0	1	0
1	36	0	36	2040	12	37.7143	0	1	1	0	0	0	21239.3	0	0	0	0	0	0	1	29	0	1	0	0	0	1	0
0	30	1	30.1429	800	73	40.5714	0	1	1	0	0	1	126300	0	0	0	0	0	0	1	37	0	1	0	0	1	1	0
1	35	4	35.5714	2680	10	37	0	1	0	0	0	0	15862.2	0	0	0	0	0	0	0	33	1	0	0	0	1	1	1
0	36	0	36	2050	8	37.1429	1	1	0	0	0	0	15768.8	0	0	0	0	0	0	1	39	0	0	1	0	0	1	0
0	36	0	36	2230	8	37.1429	1	1	0	0	0	0	15739.8	0	0	0	0	0	0	1	39	0	0	1	0	0	1	0
0	28	0	28	960	64	37.1429	1	1	1	0	0	1	136945	0	0	1	0	0	0	1	26	0	0	1	0	1	1	0
1	28	0	28	1060	22	31.1429	1	1	0	0	0	1	168051	0	0	0	0	0	0	0	26	0	0	1	0	1	1	0
0	34	1	34.1429	1830	17	36.5714	0	1	0	0	0	0	34966.6	0	0	0	0	0	0	1	31	0	0	0	0	0	1	1
0	29	4	29.5714	1350	51	36.8571	1	1	0	0	0	1	134598	0	0	1	0	0	0	1	36	0	0	1	0	1	1	1
0	29	4	29.5714	1480	51	36.8571	1	1	0	0	0	1	129620	0	0	1	0	0	0	1	36	0	0	1	0	1	1	1
0	33	0	33	1680	26	36.7143	0	1	0	0	0	1	62446	0	0	0	0	0	0	0	38	1	1	0	0	1	1	0
0	36	3	36.4286	2370	8	37.5714	0	1	0	0	0	0	15268.8	0	0	0	0	0	0	1	42	0	0	0	0	0	1	0
1	35	4	35.5714	2800	11	37.1429	1	1	0	0	0	0	22488	0	0	0	0	0	0	0	26	1	1	1	0	1	1	0
1	35	4	35.5714	2280	11	37.1429	1	1	0	0	0	0	22806	0	0	0	0	0	0	0	26	1	1	1	0	1	1	0
1	35	4	35.5714	2810	10	37	1	1	0	0	0	0	16021.5	0	0	0	0	0	0	0	37	1	0	1	0	1	1	0
1	35	4	35.5714	2200	10	37	1	1	0	0	0	0	18434.4	0	0	0	0	0	0	1	37	1	0	1	0	1	1	0
0	34	6	34.8571	2290	13	36.7143	0	1	0	0	0	0	20989.2	0	0	0	0	0	0	0	31	1	0	0	0	0	1	0
0	35	4	35.5714	2210	10	37	1	1	0	0	0	0	17411.2	0	0	0	0	0	0	1	33	0	0	0	0	0	1	0
0	35	4	35.5714	2230	12	37.2857	1	1	0	0	0	0	21013.6	0	0	0	0	0	0	0	33	0	0	0	0	0	1	0
1	36	0	36	1880	17	38.4286	0	1	1	0	0	0	26815.6	0	0	0	0	0	0	1	30	1	0	0	0	0	1	0
1	36	6	36.8571	2620	7	38.2857	0	1	0	0	0	0	13465.1	0	0	0	0	0	0	1	31	1	0	0	0	0	0	1
1	36	4	36.5714	3690	6	37.4286	0	1	0	0	0	0	11896.4	0	0	0		0	0	0	38	0	0	1	0	0	1	0
1	34	6	34.8571	2370	9	36.1429	0	1	0	0	0	0	15245.7	0	0	0	0	0	0	0	31	1	1	0	0	1	1	0
1	33	2	33.2857	2190	17	35.7143	0	1	0	0	0	0	31751.8	0	0	0	0	0	0	0	28	0	0	0	0	0	1	1
1	33	0	33	1590	30	37.2857	0	1	0	0	0	0	51446.6	0	0	0	0	0	0	1	26	1	1	0	0	1	1	0
0	33	5	33.7143	1670	21	36.7143	0	1	0	0	0	0	33922.2	0	0	0	0	0	0	1	35	0	0	0		1	1	0
1	35	5	35.7143	2610	6	36.5714	1	1	0	0	0	0	12189.6	0	0	0	0	0	0	0	30	1	1	0	0	0	1	0
0	35	5	35.7143	1910	17	38.1429	1	1	1	0	0	0	27864.7	0	0	0	0	0	0	1	30	1	1	0	0	0	1	0
0	36	0	36	2160	6	36.8571	0	1	1	0	0	0	11266.4	0	0	0	0	0	0	1	26	1	1	0	0	1	1	0
1	36	2	36.2857	2960	5	38	0	1	0	0	0	0	8169.46	0	0	0	0	0	0	0	34	1	0	0	0	0	0	1
0	32	3	32.4286	1900	16	34.7143	0	1	0	0	0	0	26292	0	0	0	0	0	0	0	35	0	0	0	0	1	0	1
1	32	4	32.5714	2210	21	35.5714	0	1	0	0	0	0	32292.3	0	0	0	0	0	0	0	32	0	0	1	0	1	0	0
1	27	5	27.7143	1200	74	38.2857	1	1	0	0	0	1	153575	0	0	1	0	0	0	0	25	1	0	0	0	1	1	0
0	36	6	36.8571	2490	6	37.7143	0	1	0	0	0	0	10332.7	0	0	0	0	0	0	0	28	1	0	0	1	1	0	0
0	35	0	35	2330	12	36.7143	1	1	0	0	0	0	20540.3	0	0	0	0	0	0	0	41	0	0	0	0	0	1	0
1	35	0	35	1870	12	36.7143	1	1	1	0	0	0	19001	0	0	0	0	0	0	1	41	0	0	0	0	0	1	0
1	35	5	35.7143	2950	7	36.7143	0	1	0	0	0	0	14158.8	0	0	0		0	0	0	35	1	0	1	0	0	0	1
0	31	5	31.7143	1520	29	35.8571	1	1	0	0	0	0	43500	0	0	0	0	0	0	0	28	1	1	0	0	1	1	0
0	31	5	31.7143	1510	29	35.8571	1	1	0	0	0	1	44355.1	0	0	0	0	0	0	0	28	1	1	0	0	1	1	0
0	36	0	36	2250	8	37.1429	1	1	0	0	0	0	13897.4	0	0	0	0	0	0	1	26	0	0	0	0	0	1	0
0	35	4	35.5714	1410	36	40.7143	0	1	1	0	0	0	60136.2	0	0	0	0	0	0	1	32	1	1	0	0	1	1	0
0	33	2	33.2857	1530	32	37.8571	0	1	0	0	0	0	56433.4	0	0	0	0	0	0	1	34	0	1	1	0	1	1	0
1	34	6	34.8571	2680	14	36.8571	0	1	0	1	0	0	60864.8	0	0	0	0	0	0	0	39	1	0	0	0	0	1	0
1	32	6	32.8571	1720	21	35.8571	1	1	0	0	0	1	46157.6	0	0	0	0	0	0	0	27	1	0	0	0	0	1	0
1	32	6	32.8571	2220	15	35	1	1	0	0	0	1	42250.5	0	0	0	0	0	0	0	27	1	0	0	0	0	1	0
0	33	4	33.5714	2000	16	35.8571	0	1	0	1	0	1	46927.2	0	0	0	0	0	0	0	39	0	0	0	0	1	1	0
0	36	4	36.5714	2850	7	37.5714	1	1	0	0	0	0	13298.9	0	0	0	0	0	0	0	31	1	0	0	0	1	1	0
0	36	6	36.8571	2530	5	38	0	1	0	0	0	0	9689.48	0	0	0	0	0	0	0	29	1	1	0	0	0	0	0
0	33	1	33.1429	1270	43	39.2857	0	1	1	0	0	0	70437.5	0	0	0	0	0	0	1	30	1	1	0	0	1	1	0
1	35	5	35.7143	2470	7	36.7143	1	1	0	0	0	0	14455.5	0	0	0	0	0	0	0	26	0	0	0	0	1	1	0
1	35	3	35.4286	2660	8	36.5714	0	1	0	0	0	0	16410	0	0	0	0	0	0	0	30	0	0	0	0	0	0	0
1	32	3	32.4286	1490	25	36	0	1	0	0	0	1	58004.1	0	0	0	0	0	0	1	37	0	1	1	0	1	1	0
0	32	0	32	1920	21	35	0	1	0	0	0	0	33180.8	0	0	0	0	0	0	0	32	0	0	0	0	0	0	0
1	35	3	35.4286	2600	9	36.7143	1	1	0	0	0	0	16940	0	0	0	0	0	0	0	36	0	0	0	0	1	1	0
1	35	3	35.4286	2300	9	36.7143	1	1	0	0	0	0	15636.3	0	0	0	0	0	0	0	36	0	0	0	0	1	1	0
0	36	2	36.2857	2250	12	1.71429	0	1	0	0	0	0	22265.9	0	0	0	0	0	0	0	28	1	0	1	0	1	1	0
0	32	0	32	1780	44	38.2857	1	1	0	0	0	1	89014.2	0	0	0	0	0	0	0	26	0	1	0	0	0	1	0
0	32	0	32	950	62	40.8571	1	1	1	0	0	1	118916	0	0	0	0	0	0	1	26	0	1	0	0	0	1	0
1	36	3	36.4286	2160	8	37.5714	0	1	1	0	0	0	13743.6	0	0	0	0	0	0	1	36	0	1	0	0	0	1	0
1	33	5	33.7143	2300	13	35.5714	0	1	0	0	0	0	23021	0	0	0	0	0	0	0	28	1	0	1	0	0	1	0
1	26	2	26.2857	850	85	38.4286	0	1	0	1	1	1	168168	0	0	0	0	1	0	0	39	0	0	0	0	0	0	1
0	35	6	35.8571	2550	6	36.7143	1	1	0	0	0	0	12203.2	0	0	0	0	0	0	0	32	1	0	1	1	1	1	0
0	36	6	36.8571	2350	17	39.2857	1	1	0	0	0	0	27296.7	0	0	0	0	0	0	1	32	1	0	1	1	1	1	0
0	36	1	36.1429	2420	8	37.2857	0	1	0	0	0	0	12196.3	0	0	0	0	0	0	0	31	1	0	1	0	0	1	0
0	36	4	36.5714	2940	7	37.5714	0	1	0	0	0	0	13080.4	0	0	0	0	0	0	0	31	0	0	1	0	0	1	0
1	36	5	36.7143	2030	14	38.7143	1	1	1	0	0	0	21290.9	0	0	0	0	0	0	1	39	1	0	1	0	1	1	0
0	33	4	33.5714	1770	24	37	0	1	0	0	0	0	52184.6	0	0	0	0	0	0	1	25	1	0	0	0	0	0	0
1	35	5	35.7143	2510	10	37.1429	1	1	0	0	0	0	17121.3	0	0	0	0	0	0	0	31	1	0	0	0	1	1	0
1	35	5	35.7143	2730	11	37.2857	0	1	0	0	0	0	22276.3	0	0	0	0	0	0	0	36	1	0	1	0	0	1	1
0	35	5	35.7143	2340	7	36.7143	0	1	0	0	0	0	12319.1	0	0	0	0	0	0	0	28	1	0	0	0	0	1	0
1	33	3	33.4286	3940	45	39.8571	0	1	0	0	0	0	92179	0	0	0	0	1	0	0	28	0	0	1	0	1	1	1
0	35	4	35.5714	2610	9	36.8571	0	1	0	0	0	0	15223.4	0	0	0	0	0	0	0	36	1	0	1	1	0	1	0
1	35	0	35	2640	8	36.1429	0	1	0	0	0	0	13068.5		0	0	0	0	0	0	33	0	0	0	0	1	1	0
0	35	2	35.2857	2490	9	36.5714	1	1	0	0	0	0	16284.8	0	0	0	0	0	0	0	32	0	1	1	0	0	1	0
1	35	2	35.2857	3000	9	36.5714	1	1	0	0	0	0	19095.3	0	0	0	0	0	0	0	32	0	1	1	0	0	1	0
0	36	2	36.2857	3170	8	37.4286	0	1	0	0	0	0	15048.9	0	0	0	0	0	0	0	29	0	0	0	0	0	1	0
0	36	4	36.5714	2190	14	38.5714	0	1	0	0	0	0	23010.5	0	0	0	0	0	0	1	34	1	1	0	0	0	1	0
0	36	6	36.8571	2920	7	37.8571	1	1	0	1	0	0	14623.5	0	0	0	0	0	0	0	31	1	0	0	0	0	1	0
1	36	6	36.8571	3140	7	37.8571	1	1	0	1	0	0	15215.8	0	0	0	0	0	0	0	31	1	0	0	0	0	1	0
0	36	4	36.5714	4800	8	37.7143	0	1	0	0	0	0	16285.1	0	0	0	0	0	0	0	36	0	0	1	0	0	1	1
1	31	1	31.1429	1550	35	36.1429	0	1	0	0	0	0	84142.5	0	0	0	0	1	1	0	28	0	0	0	0	1	1	1
0	35	3	35.4286	2550	14	37.4286	0	1	0	0	0	0	21954.9	0	0	0	0	0	0	0	35	0	0	0	0	0	0	1
0	35	0	35	2650	14	37	0	1	0	0	0	0	19182.4	0	0	0	0	0	0	0	31	1	0	0	0	0	1	0
1	35	2	35.2857	2370	8	36.4286	0	1	0	0	0	0	12973.3	0	0	0	0	1	0	0	32	0	0	0	0	0	0	0
1	36	1	36.1429	2200	15	38.2857	0	1	1	0	0	0	20826.8	0	0	0	0	0	0	1	31	0	0	0	0	0	1	0
1	36	1	36.1429	1930	15	38.2857	0	1	0	0	0	0	21449.7	0	0	0	0	0	0	1	31	0	0	0	0	0	1	0
1	36	1	36.1429	2340	8	37.2857	0	1	0	0	0	0	13091.3	0	0	0	0	0	0	1	29	1	0	1	0	0	1	0
1	33	1	33.1429	2510	20	36	0	1	0	0	0	0	31869	0	0	0	0	1	0	0	31	0	0	0	0	0	0	0
1	36	0	36	2450	29	40.1429	0	1	0	0	0	0	65216.5	0	1	0	0	1	0	1	30	1	0	0	0	0	0	0
0	34	2	34.2857	2710	7	35.2857	0	1	0	0	0	0	13624.4	0	0	0	0	0	0	0	31	0	0	0	0	0	0	0
1	36	1	36.1429	2260	12	37.8571	0	1	1	0	0	1	33755.4	0	0	0	0	0	0	1	33	0	1	0	0	0	1	0
0	36	3	36.4286	2800	6	37.4286	0	1	0	0	0	0	11963	0	0	0	0	0	0	0	33	0	0	0	0	0	1	1
0	35	4	35.5714	2350	8	36.7143	0	1	0	0	0	0	13347.1	0	0	0	0	0	0	0	35	0	0	0	0	0	0	0
0	33	5	33.7143	1740	32	38.2857	0	1	0	0	0	0	56638.4	0	0	0	0	1	0	0	30	1	1	1	0	0	1	0
0	35	3	35.4286	1920	11	37	0	1	1	0	0	0	16421.7	0	0	0	0	0	0	1	29	0	0	0	0	0	0	0
0	34	2	34.2857	2600	12	36	0	1	0	0	0	0	21151.1	0	0	0	0	0	0	0	39	0	1	0	0	0	1	0
1	33	6	33.8571	1650	31	38.2857	0	1	0	0	0	0	44882.8	0	0	0	0	0	0	1	36	0	1	0	0	0	1	0
0	34	6	34.8571	2440	11	36.4286	1	1	0	0	0	0	20856.9		0	0	0	0	0	0	28	0	0	1	0	0	1	0
0	34	6	34.8571	2320	8	36	1	1	0	0	0	0	14163.2		0	0	0	0	0	0	28	0	0	1	0	0	1	0
0	36	1	36.1429	2700	8	37.2857	0	1	0	0	0	0	15065	0	0	0	0	0	0	0	32	1	0	0	0	0	0	1
1	35	3	35.4286	2920	14	37.4286	0	1	0	0	1	0	31027.1	0	0	0	0	0	0	0	38	0	1	0	0	0	1	0
1	34	5	34.7143	2790	10	36.1429	0	1	0	0	0	0	18331.9	0	0	0	0	0	0	0	21	0	0	1	0	0	0	0
0	36	4	36.5714	2500	5	37.4286	0	1	0	0	0	0	9664.24	0	0	0	0	0	0	0	35	0	0	1	0	0	1	0
1	35	3	35.4286	2770	14	37.4286	0	1	0	0	0	0	22937.3	0	0	0	0	0	0	0	25	0	0	0	0	0	0	0
1	30	6	30.8571	1350	36	36	0	1	0	0	0	0	75200.6	0	0	0	0	1	0	0	28	1	1	1	0	0	1	0
0	34	0	34	1760	31	38.4286	0	0	0	0	0	1	76418.8	0	0	0	0	0	0	1	34	0	1	0	0	1	1	0
1	35	5	35.7143	2570	8	36.8571	0	1	0	0	0	0	15866.3	0	0	0	0	0	0	0	37	0	0	0	0	0	1	0
1	36	3	36.4286	2560	10	37.8571	1	1	0	0	0	0	17312.8	0	0	0	0	0	0	0	24	1	0	0	0	0	1	0
1	36	3	36.4286	2670	10	37.8571	1	1	0	0	0	0	17050.6	0	0	0	0	0	0	0	24	1	0	0	0	0	1	0
0	28	3	28.4286	860	87	40.8571	0	1	0	0	0	1	204372	0	0	1	0	1	0	0	34	1	1	0	0	1	1	0
1	33	1	33.1429	1410	24	36.5714	1	1	1	1	0	1	43931.3	0	0	0	0	0	0	1	35	0	1	0	0	0	1	0
1	33	1	33.1429	1540	24	36.5714	1	1	1	0	0	1	47370	0	0	0	0	0	0	0	35	0	1	0	0	0	1	0
1	34	5	34.7143	2480	8	35.8571	0	1	0	0	0	0	14301.1	0	0	0	0	0	0	0	28	1	1	0	0	1	1	0
1	28	5	28.7143	950	77	39.7143	0	1	0	0	0	0	175440	0	1	1	0	1	0	1	31	1	1	0	0	0	1	0
0	36	2	36.2857	2900	7	37.2857	0	1	0	0	0	0	12875.9	0	0	0	0	0	0	0	22	0	1	0	0	0	1	0
0	36	2	36.2857	1960	11	37.8571	0	1	1	0	0	0	17699.1	0	0	0	0	0	0	1	22	1	1	0	0	0	1	0
1	31	0	31	1490	54	38.7143	0	1	0	0	0	1	118205	0	0	0	0	1	1	0	31	1	0	0	0	0	1	1
0	34	0	34	2900	16	36.2857	0	1	0	0	0	0	24641.6	0	0	0	0	0	0	0	26	1	0	0	0	0	0	1
0	36	5	36.7143	2880	6	37.5714	0	1	0	0	0	0	10991.5	0	0	0	0	0	0	0	32	1	1	1	0	0	0	0
1	35	4	35.5714	2850	15	37.7143	0	1	0	1	0	0	26941	0	0	0	0	0	0	0	32	0	0	0	0	0	1	0
1	36	4	36.5714	3530	12	38.7143	0	1	0	0	0	0	16875.5	0	0	0	0	0	0	0	36	0	0	0	0	0	0	0
1	35	4	35.5714	2360	10	37	0	1	0	0	0	0	16977.6	0	0	0	0	0	0	1	38	0	0	1	0	0	1	0
0	31	4	31.5714	1490	37	36.8571	0	1	0	0	0	0	52986	0	0	0	0	0	0	0	33	1	0	0	0	1	1	1
1	34	5	34.7143	2740	11	36.2857	0	1	0	0	0	0	22701.5	0	0	0	0	0	0	0	34	1	0	0	0	0	1	0
0	35	5	35.7143	2500	9	37	0	1	0	0	0	0	14138.3	0	0	0	0	0	0	0	26	0	0	0	1	1	1	0
1	36	2	36.2857	2570	9	37.5714	0	1	0	0	0	0	13187.1	0	0	0	0	0	0	1	32	1	0	0	0	0	0	0
1	28	6	28.8571	1460	63	37.8571	0	1	0	0	0	1	125802	0	0	1	0	0	0	0	30	1	0	0	0	0	0	1
0	35	2	35.2857	2270	9	36.5714	0	1	0	0	0	0	15989.1	0	0	0	0	0	0	0	39	0	1	0	0	0	1	0
1	36	3	36.4286	2390	7	37.4286	0	1	0	0	0	0	11603.8	0	0	0	0	0	0	0	32	1	0	0	0	1	1	0
1	27	1	27.1429	950	86	39.4286	0	1	0	0	0	1	192970	0	0	1	0	1	1	0	33	0	0	1	0	0	1	1
1	35	4	35.5714	2970	14	37.5714	0	1	0	0	0	0	21764.7	0	0	0	0	0	0	0	28	1	0	0	0	0	0	1
1	36	5	36.7143	2070	9	38	1	1	1	0	0	0	16604.2	0	0	0	0	0	0	1	38	0	0	0	0	0	1	0
1	36	5	36.7143	2420	9	38	1	1	0	0	0	0	15261.7	0	0	0	0	0	0	1	38	0	0	0	0	0	1	0
1	33	3	33.4286	2100	20	36.2857	0	1	0	0	0	0	8353.55	0	0	0	0	0	0	0	33	1	0	1	0	1	1	0
0	36	0	36	1900	33	40.7143	0	1	0	0	0	0	59562.8	0	0	0	0	1	1	1	33	1	0	0	0	0	0	1
0	30	0	30	1180	47	36.7143	0	1	0	0	0	0	104549	0	0	1	0	0	0	0	42	0	1	1	0	1	1	0
0	35	3	35.4286	2520	8	36.5714	0	1	0	0	0	0	14849.7	0	0	0	0	0	0	0	28	1	0	0	0	0	1	0
1	31	2	31.2857	1660	28	35.2857	0	1	0	0	0	1	71935.2	1	0	0	0	0	1	0	32	1	0	1	0	0	1	1
1	33	1	33.1429	1940	20	36	0	1	0	0	0	0	32276.2	0	0	0	0	0	0	0	27	1	0	0	0	0	0	1
0	34	4	34.5714	1820	17	37	0	1	0	0	0	0	23270.1	0	0	0	0	0	0	1	42	0	0	0	0	0	1	0
0	34	4	34.5714	1580	25	38.1429	0	1	1	0	0	0	37315.1	0	0	0	0	0	0	1	42	0	0	0	0	0	1	0
1	36	5	36.7143	2330	8	37.8571	1	1	0	0	0	0	11837.1	0	0	0	0	0	0	1	28	1	0	0	0	1	1	0
1	36	5	36.7143	2000	8	37.8571	1	1	1	0	0	0	12968.6	0	0	0	0	0	0	1	28	1	0	0	0	1	1	0
0	35	5	35.7143	2350	7	36.7143	1	1	0	0	0	0	12148	0	0	0	0	0	0	0	27	0	0	0	0	0	1	0
1	34	6	34.8571	2380	10	36.2857	0	1	0	0	0	0	14935.2	0	0	0	0	0	0	0	34	1	0	0	0	0	0	1
1	35	0	35	2450	9	36.2857	0	1	0	0	0	0	16375.7	0	0	0	0	0	0	0	27	1	0	0	0	1	0	0
1	36	0	36	1960	11	37.5714	0	1	1	0	0	0	17234.4	0	0	0	0	0	0	1	29	0	1	0	0	0	1	0
0	36	1	36.1429	2340	6	37	0	1	0	0	0	0	9528.48	0	0	0	0	0	0	0	34	0	1	0	0	0	1	0
0	35	6	35.8571	3030	7	36.8571	0	1	0	0	0	0	12484.1	0	0	0	0	0	0	0	35	0	0	0	0	1	0	1
0	34	4	34.5714	2390	13	36.4286	0	1	0	1	0	0	23276.6	0	0	0	0	0	0	0	27	1	0	0	0	0	1	0
0	35	4	35.5714	2300	10	37	0	1	0	1	0	0	15543	0	0	0	0	0	0	1	33	0	0	0	0	1	1	0
1	36	1	36.1429	3810	6	37.4286	0	1	0	0	0	0	9806.19	0	0	0	0	0	0	0	32	0	0	0	0	0	1	0
1	36	4	36.5714	2800	5	37.5714	0	1	0	0	0	0	8703.85	0	0	0	0	0	0	0	29	1	0	0	0	0	1	0
0	33	0	33	1970	23	36.2857	1	1	0	0	0	0	35295.1	0	0	0	0	0	0	0	31	1	0	0	0	1	1	1
1	33	0	33	2110	23	36.2857	1	1	0	0	0	0	38569.1	0	0	0	0	0	0	0	31	1	0	0	0	1	1	1
1	31	6	31.8571	1670	28	35.8571	0	1	0	1	0	1	80839.9	0	0	0	0	1	0	0	43	1	1	0	0	0	1	0
1	35	5	35.7143	2920	6	36.5714	0	1	0	0	0	0	11286	0	0	0	0	0	0	0	34	0	0	0	0	0	1	0
0	29	6	29.8571	1490	44	36.1429	0	1	0	0	0	0	107750	0	0	0	0	0	0	0	36	0	0	0	0	0	1	0
0	36	0	36	2450	11	37.5714	0	1	0	0	0	0	14961.2	0	0	0	0	0	0	0	35	1	0	0	0	0	1	0
0	33	0	33	1770	23	36.2857	0	1	0	0	0	0	36611.5	0	0	0	0	0	0	0	32	0	0	0	0	1	0	0
1	34	5	34.7143	2490	10	36.1429	0	1	0	0	0	0	16006.3	0	0	0	0	0	0	0	25	0	0	0	0	0	0	0
0	34	0	34	2500	20	36.8571	0	0	0	0	0	1	61769.7	0	0	0	0	0	0	0	34	0	0	0	0	1	1	0
1	35	5	35.7143	2580	6	36.5714	0	1	0	0	0	0	10680.3	0	0	0	0	0	0	0	35	1	0	0	0	0	0	0
1	36	0	36	2520	17	38.4286	0	1	0	0	0	1	48291.7	0	0	0	0	1	0	0	31	1	0	1	0	0	0	1
0	36	1	36.1429	2270	7	37.1429	0	1	0	0	0	0	12150.7	0	0	0		0	0	0	42	0	0	1	0	0	1	0
1	35	5	35.7143	2280	15	37.8571	0	1	0	0	0	0	27409.8	0	0	0	0	1	0	1	28	1	0	0	0	0	0	0
0	34	3	34.4286	1860	18	37	0	1	0	0	0	0	26288.9	0	0	0	0	0	0	0	32	1	0	0	0	1	1	0
1	36	3	36.4286	2560	5	37.1429	0	1	0	0	0	0	9033.5	0	0	0	0	0	0	0	25	1	0	0	0	0	1	0
0	29	0	29	1100	55	36.8571	0	1	0	0	0	0	97103	0	0	0	0	0	0	0	33	1	0	1	0	0	0	1
1	36	2	36.2857	2470	8	37.4286	1	1	0	0	0	0	13881	0	0	0	0	0	0	0	28	0	0	0	0	0	1	0
1	36	2	36.2857	2810	8	37.4286	1	1	0	0	0	0	15278	0	0	0	0	0	0	0	28	0	0	0	0	0	1	0
0	34	5	34.7143	2340	14	36.7143	0	1	0	0	0	0	27611.3	0	0	0	0	0	0	0	28	0	0	0	0	1	1	0
1	34	2	34.2857	2190	10	35.7143	1	1	0	0	0	0	18313.9	0	0	0	0	0	0	0	36	1	0	0	0	1	1	0
1	34	2	34.2857	2110	10	35.7143	1	1	0	0	0	0	18517.3	0	0	0	0	0	0	0	36	1	0	0	0	1	1	0
0	36	4	36.5714	2290	8	37.7143	0	1	0	0	0	0	13972.2	0	0	0	0	0	0	1	27	1	0	1	0	0	1	1
0	30	1	30.1429	1180	43	36.2857	0	1	0	1	0	1	94746.2	0	0	0	0	0	0	0	35	0	1	1	0	0	1	0
0	30	1	30.1429	1170	43	6.14286	0	1	1	1	0	1	98789	1	0	0	0	0	0	0	35	0	1	1	0	0	1	0
1	36	3	36.4286	2460	6	37.7143	0	1	0	0	0	0	10168.8	0	0	0	0	0	0	0	34	0	0	0	0	0	1	0
1	36	4	36.5714	3130	6	37.8571	0	0	0	0	0	0	5476.58		0	0	0	0	0	0	40	0	0	1	0	0	0	0
0	34	2	34.2857	1590	27	38.1429	0	1	1	0	0	0	42831.7	0	0	0	0	0	0	1	33	0	0	0	0	1	1	0
0	26	5	26.7143	1000	78	37.8571	0	1	0	0	0	1	185074	0	0	1	0	0	0	0	38	1	0	0	1	1	0	0
1	35	4	35.5714	2410	8	36.7143	0	1	0	0	0	0	13806.9	0	0	0	0	0	0	0	27	1	0	0	0	0	0	1
1	36	5	36.7143	2600	8	37.8571	1	1	0	0	0	0	14567.4	0	0	0	0	0	0	0	26	0	0	0	0	0	1	0
1	36	5	36.7143	2650	8	37.8571	1	1	0	0	0	0	13752	0	0	0	0	0	0	0	26	0	0	0	0	0	1	0
1	35	5	35.7143	2560	12	37.4286	0	1	0	0	0	0	20941.5	0	0	0	0	0	0	0	32	1	0	0	0	0	0	0
1	31	3	31.4286	2080	26	35.1429	0	1	0	1	0	0	42062.8	0	0	0	0	1	0	0	31	0	0	0	0	0	1	0
0	36	3	36.4286	2490	10	37.8571	0	1	0	0	0	0	19208.9	0	0	0	0	0	0	0	32	1	0	0	0	0	0	0
1	35	3	35.4286	2640	11	37	0	1	0	0	0	0	18795.2	0	0	0	0	0	0	0	38	0	0	1	0	0	0
0	33	3	33.4286	2020	22	36.5714	1	1	0	1	0	0	47788.7	0	0	0	0	0	0	0	31	1	0	0	0	0	0	0
0	33	3	33.4286	2000	22	36.5714	1	1	0	0	0	0	44314.5	0	0	0	0	1	1	0	31	1	0	0	0	0	0	0
0	36	0	36	2650	7	37	0	1	0	0	0	0	12484	0	0	0	0	0	0	0	26	1	0	0	1	0	1	0
1	35	2	35.2857	2790	12	37	0	1	0	0	0	0	21608.5	0	0	0	0	0	0	0	39	1	0	0	0	1	1	0
1	36	6	36.8571	2800	7	38	1	1	0	0	0	0	10991.6	0	0	0		0	0	0	28	1	0	0	0	0	1	0
1	36	6	36.8571	2680	7	38	1	1	0	0	0	0	11902.2	0	0	0		0	0	0	28	1	0	0	0	0	1	0
0	35	2	35.2857	2370	9	36.5714	0	1	0	0	0	0	16591.7	0	0	0		0	0	0	27	1	0	1	0	0	0	0
0	34	3	34.4286	1880	15	36.5714	0	1	0	0	0	0	25496.4	0	0	0	0	0	0	1	34	0	1	1	0	1	1	0
1	35	0	35	2260	8	36.1429	0	1	0	0	0	0	15038.2	0	0	0		0	0	1	28	1	0	1	0	0	0	0
1	34	0	34	2100	8	35.1429	1	1	0	0	0	0	12761.7	0	0	0	0	0	0	0	29	0	0	0	0	0	1	0
1	34	0	34	2300	8	35.1429	1	1	0	0	0	0	13047.6	0	0	0	0	0	0	0	29	0	0	0	0	0	1	0
1	33	0	33	1980	16	35.2857	0	1	0	0	0	0	27316.3	0	0	0		0	0	0	29	0	0	0	0	0	1	0
0	36	2	36.2857	3050	6	37.1429	0	1	0	0	0	0	10806.3	0	0	0		0	0	0	40	0	0	1	0	0	1	0
0	34	3	34.4286	2250	10	35.8571	0	1	0	0	0	0	17305.2	0	0	0		0	0	0	28	1	0	0	0	0	0	1
1	32	3	32.4286	1670	40	38.1429	0	1	0	0	0	0	66461.4	0	0	0	0	0	0	0	29	0	0	0	0	0	1	0
1	25	0	25	770	111	40.8571	0	1	0	1	1	1	299473	1	0	1	1	1	0	0	31	0	0	0	0	0	1	0
0	35	3	35.4286	2260	21	38.4286	0	1	0	0	0	0	30000.2	0	0	0	0	0	0	0	35	0	0	1	0	0	1	0
1	28	4	28.5714	1320	50	35.7143	0	1	0	0	0	0	91362.1	0	0	0	0	0	0	0	28	0	0	0	0	1	1	1
0	35	3	35.4286	2510	8	36.5714	0	1	0	0	0	0	14638.6	0	0	0	0	0	0	0	26	0	0	0	0	0	1	0
1	35	1	35.1429	2420	7	36.1429	1	1	0	0	0	0	14853.4	0	0	0		0	0	0	28	1	0	0	0	0	1	0
0	35	1	35.1429	2430	10	36.5714	1	1	0	0	0	0	18136	0	0	0		0	0	0	28	1	0	0	0	0	1	0
0	34	6	34.8571	1740	15	37	0	1	0	0	0	0	24095.2	0	0	0	0	0	0	1	36	0	0	0	0	0	1	0
1	30	0	30	1430	53	37.5714	1	1	0	0	0	0	100542	0	0	1	0	1	0	1	32	1	0	0	0	0	1	0
0	35	0	35	2470	9	36.2857	0	1	0	0	0	0	15159.1	0	0	0	0	0	0	0	27	0	0	1	0	0	1	0
1	35	3	35.4286	2890	16	37.7143	0	1	0	0	0	0	23374.8	0	0	0	0	0	0	0	30	1	0	0	0	0	1	0
1	34	6	34.8571	2450	14	36.8571	0	1	0	0	0	0	24327.9	0	0	0		0	0	0	25	1	0	0	0	0	1	1
1	34	2	34.2857	2320	10	35.7143	0	1	0	0	0	0	17671.9	0	0	0		0	0	0	31	1	0	0	0	0	1	0
1	36	6	36.8571	4060	12	38.5714	0	1	0	1	0	0	19066.6	0	0	0		0	0	0	39	0	1	1	0	0	0	0
0	35	4	35.5714	1700	15	37.7143	1	1	1	0	0	0	23590.8	0	0	0	0	0	0	1	29	1	0	0	0	1	1	0
1	35	4	35.5714	2330	8	36.7143	1	1	0	0	0	0	13137.3	0	0	0		0	0	0	29	1	0	0	0	1	1	0
1	34	3	34.4286	2130	14	36.4286	0	1	0	0	0	0	24013.4	0	0	0	0	0	0	0	41	0	1	0	0	0	1	0
0	35	3	35.4286	3220	8	36.5714	0	1	0	0	0	0	17154.2	0	0	0		0	0	0	34	0	0	0	0	0	1	1
0	32	6	32.8571	1260	30	37.1429	1	1	1	0	0	0	62168.5	0	0	0	0	0	0	1	37	1	1	0	0	1	1	0
0	32	6	32.8571	1770	22	36	1	1	0	0	0	0	36786.9	0	0	0	0	0	0	0	37	1	1	0	0	1	1	0
0	35	1	35.1429	2190	13	37	0	1	0	0	0	0	22196	0	0	0	0	0	0	0	35	0	0	0	0	0	1	0
0	30	2	30.2857	1060	48	37.1429	1	1	0	0	0	0	99131.1	0	0	0	0	0	0	1	28	1	0	0	0	1	1	0
0	30	2	30.2857	1210	43	36.4286	1	1	0	0	0	0	79217.2	0	0	0	0	0	0	0	28	1	0	0	0	1	1	0
0	30	2	30.2857	1210	43	36.4286	1	1	0	0	0	0	82002.4	0	0	0	0	0	0	0	28	1	0	0	0	1	1	0
1	35	6	35.8571	4000	17	38.2857	0	1	0	0	0	0	38693.3	0	0	0	0	0	0	0	37	0	0	0	0	0	1	0
0	36	2	36.2857	2010	14	38.2857	0	1	1	0	0	0	20663.3		0	0	0	0	0	1	38	1	1	0	0	0	1	0
0	36	2	36.2857	2370	8	37.4286	0	1	0	0	0	0	12543.8	0	0	0	0	0	0	0	38	1	1	0	0	0	1	0
0	35	5	35.7143	2350	9	37	0	1	0	0	0	0	16298.9	0	0	0		0	0	0	31	0	0	0	0	0	1	0
0	36	4	36.5714	2780	3	37.4286	0	1	0	0	0	0	6910.57	0	0	0		0	0	0	30	1	0	0	0	0	0	0
1	34	4	34.5714	2360	9	35.8571	0	1	0	0	0	0	14769	0	0	0	0	0	0	0	35	0	0	0	0	1	1	0
0	32	4	32.5714	1390	39	38.1429	0	1	0	0	0	0	66605.4	0	0	0	0	0	0	1	31	0	1	0	0	1	1	0
1	34	3	34.4286	2320	12	36.1429	0	1	0	0	0	0	24547.2	0	0	0		0	0	0	43	0	0	1	0	1	1	0
0	35	6	35.8571	2540	6	36.7143	0	1	0	0	0	0	12187.6	0	0	0	0	0	0	0	27	0	0	0	0	0	1	0
1	35	1	35.1429	2650	7	36.1429	0	1	0	0	0	0	14233.7	0	0	0	0	0	0	0	29	1	0	1	0	0	1	0
1	34	5	34.7143	2350	13	36.5714	0	1	0	0	0	0	22672.4	0	0	0	0	0	0	0	31	1	0	1	0	0	0	1
1	36	6	36.8571	1850	10	38.2857	0	1	1	0	0	0	17727	0	0	0	0	0	0	1	32	0	0	0	0	0	0	0
1	34	1	34.1429	2170	13	36	0	1	0	0	0	0	19471.8	0	0	0	0	0	0	0	26	0	1	0	0	1	1	0
1	29	6	29.8571	1340	57	38	0	1	0	0	0	1	99097.5	0	0	0	0	0	0	0	32	1	0	0	0	0	1	1
1	36	1	36.1429	2850	9	37.4286	0	1	0	0	0	0	17534.3	0	0	0	0	0	0	0	31	0	0	1	0	0	1	0
1	30	6	30.8571	1700	27	34.7143	0	1	0	0	0	0	46450.2	0	0	0	0	0	0	0	37	1	0	0	0	0	1	1
0	30	5	30.7143	1450	44	37	0	1	0	0	0	1	89682.5	0	0	0	0	0	0	0	30	0	0	0	0	0	1	1
0	36	6	36.8571	3670	9	38.1429	0	1	0	0	0	0	14974.5	0	0	0	0	0	0	0	40	1	0	0	0	1	1	0
1	36	0	36	2400	11	37.5714	1	1	0	0	0	0	16784	0	0	0		0	0	0	30	1	0	0	0	0	1	0
0	36	0	36	2660	11	37.5714	1	1	0	0	0	0	18468.8	0	0	0		0	0	0	30	1	0	0	0	0	1	0
0	33	0	33	1970	18	35.5714	0	1	0	0	0	0	45060.6	0	0	0	0	0	0	0	33	1	0	0	0	0	1	0
0	35	5	35.7143	2730	8	36.8571	0	1	0	0	0	0	13263.6	0	0	0	0	0	0	0	30	0	1	0	0	0	1	0
0	36	3	36.4286	2280	9	37.7143	0	1	1	0	0	0	15041.8	0	0	0	0	0	0	0	24	1	0	0	0	1	1	0
1	35	0	35	2180	12	36.7143	0	1	0	0	0	0	19807.5	0	0	0	0	0	0	0	34	1	0	1	0	0	0	0
0	36	2	36.2857	2860	5	37.4286	0	1	0	0	0	0	9046.13	0	0	0		0	0	0	33	0	0	1	0	0	0	0
0	27	0	27	700	91	40	0	1	0	1	0	1	223075	0	0	0	0	1	1	1	22	1	0	0	0	1	0	0
0	34	3	34.4286	1240	42	40.4286	0	1	1	0	0	0	57643.1	0	0	0	0	1	0	1	21	1	0	0	0	0	1	0
1	36	0	36	3050	7	37	0	1	0	0	0	0	13165.1	0	0	0		0	0	0	40	0	0	0	0	0	1	0
1	34	6	34.8571	2230	9	36.1429	1	1	0	0	0	0	15311.5	0	0	0		0	0	0	27	0	0	0	0	0	0	0
1	34	6	34.8571	2470	9	36.1429	1	1	0	0	0	0	15644.6	0	0	0		0	0	0	27	0	0	0	0	0	0	0
1	35	6	35.8571	2620	15	38.4286	0	1	0	0	0	0	19281.5	0	0	0	0	0	0	0	33	0	0	0	0	0	0	1
1	29	4	29.5714	960	73	40	0	1	1	0	0	1	158043	0	0	1	0	0	0	1	28	1	1	0	0	1	1	0
1	36	0	36	2630	11	37.5714	0	1	0	0	0	0	18926.4	0	0	0		0	0	0	34	1	0	0	0	0	1	0
1	32	4	32.5714	1230	51	39.8571	0	1	1	0	0	0	80462.8	0	0	0		0	0	1	36	0	0	0	0	1	1	0
0	33	6	33.8571	2150	19	36.5714	0	1	0	0	0	0	29388.2	0	0	0	0	0	0	0	28	0	0	1	0	1	0	0
0	34	1	34.1429	2060	16	36.4286	0	1	0	0	0	0	25784.8	0	0	0		0	0	0	37	0	0	1	1	1	1	0
1	34	0	34	2260	12	35.7143	0	1	0	0	0	0	24314.5	0	0	0		0	0	0	28	0	0	0	0	0	1	0
1	34	3	34.4286	2400	11	36	0	1	0	0	0	0	19389.2	0	0	0		0	0	0	34	1	0	0	0	0	1	0
1	31	3	31.4286	1610	29	35.5714	1	1	0	0	0	1	63334.3	0	0	0	0	0	0	0	26	1	0	0	0	0	1	1
1	31	3	31.4286	1450	29	35.5714	1	1	0	0	0	1	62333.1	0	0	0	0	1	1	1	26	1	0	0	0	0	1	1
1	35	3	35.4286	2400	14	37.4286	0	1	0	0	0	0	24351.4	0	0	0	0	1	0	1	26	1	0	0	0	0	0	0
1	36	4	36.5714	2750	7	37.5714	0	1	0	0	0	0	14447.1	0	0	0		0	0	0	31	1	0	0	0	1	1	0
1	36	4	36.5714	3190	5	37.2857	0	1	0	0	0	0	9748.04	0	0	0		0	0	0	32	0	0	0	0	0	1	0
1	34	0	34	1820	25	37.5714	0	1	0	0	0	0	41624.4	0	0	0	0	0	0	1	33	1	1	0	0	0	1	0
0	33	3	33.4286	1430	30	37.7143	0	1	1	0	0	0	46441	0	0	0	0	0	0	1	34	0	1	0	0	1	1	0
0	36	3	36.4286	2170	7	37.4286	0	1	1	1	0	0	17171	0	0	0		0	0	1	35	1	1	1	0	1	1	0
1	36	4	36.5714	2450	9	38.1429	0	1	0	0	0	0	14880.1	0	0	0	0	0	0	1	31	0	0	0	0	0	1	0
0	30	6	30.8571	1780	35	35.8571	0	1	0	0	0	0	61571.9	0	0	0	0	0	0	0	35	0	0	1	0	0	1	1
0	32	6	32.8571	1570	40	38.5714	0	1	0	1	0	0	67298.6	0	0	0	0	1	1	1	29	1	0	0	0	0	1	0
1	35	5	35.7143	2450	16	38	0	1	0	1	0	1	54308.8	0	0	0		0	0	0	36	0	0	0	0	0	1	0
0	36	4	36.5714	2580	7	38.1429	0	1	0	0	0	0	10121.5	0	0	0		0	0	0	31	1	0	1	0	1	1	0
0	27	6	27.8571	1180	58	36.1429	0	1	0	0	0	1	129015	0	0	0	0	0	0	0	33	0	0	0	0	1	1	0
1	36	0	36	2450	7	37	1	1	0	0	0	0	14314.3	0	0	0		0	0	0	34	1	0	1	0	0	1	0
1	36	0	36	2780	7	37	1	1	0	0	0	0	15164.4	0	0	0		0	0	0	34	1	0	1	0	0	1	0
0	36	5	36.7143	2510	10	38.1429	0	1	0	0	0	0	23103.9	0	0	0		0	0	1	24	1	0	0	0	0	1	0
1	33	2	33.2857	1580	25	36.8571	0	1	0	0	0	0	47024.6	0	0	0	0	0	0	1	42	0	1	1	0	1	1	0
1	36	1	36.1429	2290	7	37.1429	0	1	0	0	0	0	13974.2	0	0	0		0	0	0	36	1	0	1	0	1	0	0
0	35	6	35.8571	2530	8	37	1	1	0	0	0	0	7240.54	0	0	0		0	0	0	28	1	0	1	0	1	1	0
0	35	6	35.8571	2570	14	37.8571	1	1	0	0	0	0	22115.9	0	0	0		0	0	0	28	1	0	1	0	1	1	0
0	35	2	35.2857	2580	8	36.4286	0	1	0	0	0	0	13308.1	0	0	0	0	0	0	0	31	1	0	1	0	0	0	0
1	31	2	31.2857	1560	32	35.8571	0	1	0	0	0	1	64278.4	0	0	0	0	0	0	1	27	0	0	0	0	1	1	1
1	34	3	34.4286	1950	12	36.1429	0	1	0	0	0	0	22558.3	0	0	0	0	0	0	0	29	1	1	0	0	0	0	1
0	36	2	36.2857	2220	6	37.1429	0	1	0	0	0	0	10620.9	0	0	0	0	0	0	1	44	0	1	1	0	0	1	0
1	35	6	35.8571	2870	7	36.8571	0	1	0	0	0	0	13784.1	0	0	0		0	0	0	34	0	0	1	0	0	1	0
1	35	6	35.8571	2640	9	37.1429	0	1	0	0	0	0	16263.7	0	0	0		0	0	0	32	0	0	0	0	0	1	0
1	34	6	34.8571	2160	16	37.1429	0	1	0	0	0	0	29475.5	0	0	0		0	0	0	28	1	0	1	0	1	0	0
0	32	4	32.5714	1830	30	36.8571	0	1	0	0	0	0	62035	0	0	0	0	0	0	1	33	0	0	1	0	0	0	1
1	32	4	32.5714	1840	15	34.7143	0	1	0	0	0	0	28898.2	0	0	0		0	0	0	38	0	1	0	0	0	1	0
0	34	0	34	2210	14	36	1	1	0	0	0	0	24057.6	0	0	0		0	0	0	32	0	0	0	0	0	1	1
1	34	0	34	2560	14	36	1	1	0	0	0	0	24620	0	0	0		0	0	0	32	0	0	0	0	0	1	1
0	33	4	33.5714	1980	21	36.5714	0	1	0	0	0	1	47601.1	0	0	0		0	0	0	30	0	0	0	1	1	1	1
0	35	5	35.7143	2860	10	37.1429	0	1	0	0	0	0	18012.9	0	0	0		0	0	0	26	0	1	1	0	1	1	0
1	32	2	32.2857	1760	29	36.4286	1	1	0	0	0	0	45152.5	0	0	0	0	0	0	1	25	1	0	0	0	1	1	0
1	32	2	32.2857	1730	29	36.4286	1	1	0	0	0	1	58261.2	0	0	0	0	0	0	1	25	1	0	0	0	1	1	0
0	36	1	36.1429	2690	6	37	0	1	0	0	0	0	12492.3	0	0	0		0	0	0	30	0	0	0	0	0	0	0
0	34	5	34.7143	2620	8	35.8571	0	1	0	0	0	0	15802.7	0	0	0		0	0	0	27	0	0	0	0	0	1	0
1	36	2	36.2857	2530	7	37.2857	0	1	0	0	0	0	13413.9	0	0	0		0	0	0	38	0	0	0	0	0	1	0
1	33	2	33.2857	2340	22	36.4286	0	1	1	0	0	0	33517.6	0	0	0	0	0	0	0	37	0	0	0	0	0	1	1
0	30	2	30.2857	920	75	41	0	1	1	0	0	0	139561	0	0	0	1	1	1	1	28	0	1	0	0	1	1	0
0	32	5	32.7143	1760	25	36.2857	0	1	0	1	0	0	49095.6	0	0	0	0	0	0	0	37	0	1	0	0	0	1	0
0	30	1	30.1429	1100	66	39.5714	0	1	0	1	1	0	160456	0	0	1	0	1	0	1	32	1	1	0	0	0	1	0
0	36	6	36.8571	2600	5	37.8571	0	1	0	0	0	0	10693.4	0	0	0		0	0	0	27	1	0	0	0	0	0	0
1	32	2	32.2857	1600	28	36.2857	0	1	0	0	0	0	54041.4	0	0	0	0	0	0	0	25	1	1	0	0	1	1	0
0	36	4	36.5714	2750	8	37.7143	0	1	0	0	0	0	15090.5	0	0	0		0	0	0	36	0	0	0	0	0	1	0
0	35	6	35.8571	1830	21	38.8571	0	1	0	0	0	0	36537.6	0	0	0	0	1	0	1	29	1	1	0	0	1	1	0
1	32	5	32.7143	1730	30	37	0	1	0	0	0	0	66934	0	0	0	0	0	0	0	31	1	1	0	0	1	1	0
1	36	1	36.1429	2860	10	37.5714	0	1	0	0	0	0	18887.1	0	0	0		0	0	0	36	0	0	0	0	1	1	0
0	36	0	36	2430	9	37.2857	0	1	0	0	0	0	16278.7	0	0	0	0	0	0	0	29	1	0	1	0	0	1	0
1	35	6	35.8571	2200	8	37	0	1	0	0	0	0	13947.8	0	0	0		0	0	1	34	0	1	0	0	0	1	0
1	34	0	34	2360	14	36	0	1	0	0	0	0	22601.9	0	0	0	0	0	0	0	35	1	0	1	0	0	0	1
1	33	3	33.4286	1980	11	35	0	1	0	0	0	0	23190.9	0	0	0		0	0	0	29	0	0	0	0	1	0	1
0	36	1	36.1429	3000	8	37.2857	0	1	0	0	0	0	15667.9	0	0	0		0	0	0	34	0	0	1	0	0	1	0
1	33	3	33.4286	2170	14	35.4286	1	1	0	0	0	0	27057.2	0	0	0		0	0	1	35	1	0	1	1	0	1	0
1	33	3	33.4286	1900	14	35.4286	1	1	0	0	0	0	24684	0	0	0		0	0	0	35	1	0	1	1	0	1	0
0	33	2	33.2857	1570	35	38.2857	0	1	0	0	0	0	58196.9	0	0	0	0	0	0	0	25	1	1	1	0	1	1	0
1	36	1	36.1429	2750	5	37.2857	0	1	0	0	0	0	10430.1	0	0	0		0	0	0	27	1	0	0	0	0	0	1
0	36	4	36.5714	2900	3	37.4286	0	1	0	0	0	0	6898.39	0	0	0		0	0	0	35	1	0	0	0	0	0	1
1	35	1	35.1429	2350	9	36.4286	0	1	0	0	0	0	16406.7	0	0	0		0	0	0	33	0	0	0	0	0	1	1
1	31	4	31.5714	2050	25	35.1429	0	1	0	0	0	0	38019	0	0	0	0	0	0	0	31	1	0	0	0	1	0	1
1	34	2	34.2857	2240	12	36	0	1	0	0	0	0	26623.5	0	0	0		0	0	0	33	0	0	0	0	0	1	0
1	30	5	30.7143	1510	39	36.2857	0	1	0	0	0	0	91150.9	0	0	0	0	0	0	0	27	1	0	0	0	1	1	0
1	35	3	35.4286	2660	7	36.4286	0	1	0	0	0	0	13781.5	0	0	0		0	0	0	25	1	0	0	0	0	0	1
0	34	5	34.7143	1620	32	39.2857	1	1	1	0	0	0	54949.7	0	0	0	0	1	0	1	35	1	0	1	0	0	1	0
1	34	5	34.7143	2220	9	36	1	1	0	0	0	0	14352.7	0	0	0		0	0	0	35	1	0	1	0	0	1	0
1	36	1	36.1429	3110	6	37	0	1	0	0	0	0	11138.6	0	0	0		0	0	0	36	0	0	0	0	0	1	0
1	36	6	36.8571	3000	6	37.7143	0	1	0	0	0	0	11776.9	0	0	0		0	0	0	40	0	0	0	0	0	1	0
0	32	4	32.5714	1200	37	37.8571	1	1	1	0	0	0	69089.9	0	0	0	0	1	0	1	39	0	0	0	0	0	1	0
0	32	4	32.5714	1720	31	37	1	1	0	0	0	1	76657.4	1	0	0	0	0	0	0	39	0	0	0	0	0	1	0
1	32	3	32.4286	1820	28	36.4286	0	1	0	0	0	1	56636.6	0	0	0	0	0	0	0	38	0	0	1	0	0	0	0
1	35	6	35.8571	3020	11	37.4286	0	1	0	0	0	0	26935.2	0	0	0		0	0	0	31	0	0	0	0	0	1	0
1	36	5	36.7143	3800	6	37.5714	0	1	0	0	0	0	15823.3	0	0	0		0	0	0	35	0	0	1	0	0	1	0
1	36	3	36.4286	2530	9	37.7143	1	0	0	0	0	0	19595	0	0	0		0	0	0	33	1	0	1	0	0	1	0
0	36	2	36.2857	2330	8	37.4286	1	1	0	0	0	0	14212.1	0	0	0		0	0	1	32	0	0	0	0	0	1	0
0	36	2	36.2857	2120	8	37.4286	1	1	0	0	0	0	15384.1	0	0	0		0	0	1	32	0	0	0	0	0	1	0
1	36	2	36.2857	2380	11	37.8571	0	1	0	0	0	0	20403.7	0	0	0		0	0	1	31	0	0	0	0	1	1	0
0	36	2	36.2857	2890	12	38	0	1	0	0	0	0	21135.8	0	0	0		0	0	0	41	0	0	1	0	0	1	0
0	32	0	32	1650	36	37.1429	0	1	0	0	0	1	92224.8	0	0	0	0	0	0	1	28	1	0	1	0	0	1	0
0	35	4	35.5714	2660	8	36.7143	0	1	0	0	0	0	18491.5	0	0	0		0	0	0	31	0	0	0		0	1	0
0	27	4	27.5714	790	65	36.8571	0	1	0	1	1	1	122642	0	0	0	0	0	0	0	30	0	1	1	0	1	1	0
1	35	2	35.2857	2150	9	36.5714	0	1	0	0	0	0	16522.4	0	0	0		0	0	1	27	1	0	0	0	0	0	0
1	34	0	34	2260	12	35.7143	0	1	0	0	0	1	34659.1	0	0	0		0	0	0	34	0	0	0	0	1	1	0
1	32	0	32	1900	26	35.7143	0	1	0	0	0	1	60411.3	0	0	0		0	0	0	24	1	0	1	0	0	1	0
0	35	0	35	1930	12	36.7143	0	1	1	0	0	0	21059.2	0	0	0	0	0	0	0	33	0	0	0	0	0	1	0
1	32	3	32.4286	1230	50	39.5714	0	1	1	0	0	0	96916.8	0	0	0	0	0	0	1	32	1	0	1	0	1	1	0
0	34	0	34	1710	19	36.7143	0	1	1	0	0	0	23122.8	0	0	0		0	0	1	32	0	1	0	0	0	1	0
1	34	4	34.5714	2260	9	35.8571	0	1	0	0	0	0	18633.5	0	0	0		0	0	0	35	0	0	0	0	0	1	0
1	35	6	35.8571	2410	6	36.7143	1	1	0	0	0	0	11816.2	0	0	0		0	0	0	34	0	0	0	0	0	1	0
0	23	5	23.7143	600	116	40.2857	0	1	0	1	1	1	310880	0	0	1	1	1	1	1	30	1	0	0	0	0	0	0
1	35	6	35.8571	2580	34	40.7143	0	1	0	0	0	0	43621.9	0	0	0	0	0	0	0	37	0	0	0	0	0	1	1
0	36	1	36.1429	2510	7	37.1429	0	1	0	0	0	0	12500.3	0	0	0		0	0	0	31	0	0	0	0	0	0	0
1	36	6	36.8571	2430	12	38.5714	0	1	0	0	0	0	19721.2	0	0	0		0	0	1	27	1	0	0	1	0	0	0
0	35	1	35.1429	2030	9	36.4286	0	1	0	0	0	0	17210	0	0	0		0	0	0	26	1	0	0	0	0	1	0
1	32	5	32.7143	1530	49	39.7143	0	1	0	0	0	0	74069.9	0	0	0	0	0	0	0	42	0	0	1	0	1	1	0
1	35	6	35.8571	2310	10	37.2857	0	1	0	0	0	0	16372.1		0	0		0	0	1	32	0	1	1	0	0	1	0
0	35	4	35.5714	2020	11	37.1429	0	1	0	0	0	0	18191.6	0	0	0		0	0	1	40	1	0	0	0	1	1	0
1	36	1	36.1429	3100	6	37	0	1	0	0	0	0	12227.4	0	0	0		0	0	0	40	0	0	1	0	1	1	0
1	36	2	36.2857	2430	10	37.7143	0	1	0	0	0	0	18008.2	0	0	0		0	0	0	31	1	0	1	0	0	0	1
0	34	2	34.2857	2100	12	36	0	1	0	0	0	0	21780.3	0	0	0		0	0	0	27	1	0	0	0	0	1	0
1	34	6	34.8571	1930	19	37.5714	0	1	0	0	0	0	35042.4	0	0	0		0	0	1	32	1	0	0	0	1	0	1
1	36	3	36.4286	2020	7	37.4286	1	1	1	0	0	0	13862.4	0	0	0		1	0	1	28	0	0	0	0	0	1	0
1	36	3	36.4286	2610	7	37.4286	1	1	0	0	0	0	14404.9	0	0	0		0	0	0	28	0	0	0	0	0	1	0
1	36	4	36.5714	2590	8	37.7143	0	1	0	0	0	0	15100.3	0	0	0		0	0	0	30	1	0	1	0	0	1	1
1	31	3	31.4286	1390	53	39	0	1	0	0	0	0	85465.4	0	0	0	0	0	0	1	28	1	1	0	0	0	1	0
1	34	6	34.8571	2440	15	37	0	1	0	0	0	1	48966.6	0	0	0	0	0	0	0	33	1	0	0	0	0	1	0
1	34	2	34.2857	2370	14	36.2857	0	1	0	0	0	0	23002.4	0	0	0		0	0	0	28	0	0	0	0	0	0	0
1	36	1	36.1429	2390	4	37.2857	1	1	0	0	0	0	7762.44	0	0	0		0	0	1	37	1	0	0	0	1	1	0
0	34	6	34.8571	1640	23	38.1429	0	1	1	0	0	0	36902	0	0	0	0	0	0	1	32	0	1	1	0	0	1	0
0	36	2	36.2857	2630	7	37.2857	0	1	0	0	0	0	15532.9	0	0	0		0	0	0	37	0	0	0	0	0	1	0
1	35	4	35.5714	2500	9	36.8571	0	1	0	0	0	0	19231.2	0	0	0		0	0	0	31	1	0	1	0	0	0	0
1	30	3	30.4286	1330	60	39	0	1	0	0	0	0	128475	0	0	0		1	0	1	30	0	0	0	0	0	0	0
1	35	0	35	2150	22	38.1429	0	1	0	1	0	0	30145.6	0	0	0		0	0	1	32	0	0	0	0	0	1	0
1	36	0	36	2340	4	37.4286	0	1	0	0	0	0	6290.67	0	0	0		0	0	1	29	1	0	0	0	0	1	0
0	32	0	32	1630	32	36.5714	0	1	0	0	0	0	54117.1	0	0	0	0	0	0	0	31	0	0	0	0	1	1	1
0	36	1	36.1429	2040	8	37.2857	1	1	1	0	0	0	14132.5	0	0	0		0	0	1	37	1	0	0	0	1	1	0
0	33	4	33.5714	2030	15	35.7143	0	1	0	0	0	0	24105.7	0	0	0		0	0	0	36	0	0	0	0	0	1	0
0	30	0	30	1190	63	39	0	1	0	0	0	1	128578	0	0	0	0	1	1	1	41	0	0	1	0	1	1	0
1	36	1	36.1429	2790	4	37.2857	1	1	0	0	0	0	6834.98	0	0	0		0	0	0	29	0	0	1	0	0	1	0
1	35	4	35.5714	2810	7	36.5714	0	1	0	0	0	0	11550.1	0	0	0		0	0	0	27	0	0	0	0	0	0	0
1	36	4	36.5714	2960	6	37.4286	0	1	0	0	0	0	11468.6	0	0	0		0	0	0	24	1	0	0	0	0	1	0
0	36	3	36.4286	2730	17	39	0	1	0	0	0	0	25180.7	0	0	0		0	0		36	1	0	0	0	0	0	1
1	27	4	27.5714	1020	83	39.4286	0	1	0	1	0	1	194827	0	0	1	0	1	0	1	36	0	0	0	0	1	0	1
0	34	3	34.4286	2010	16	36.7143	0	1	0	0	0	0	29022	0	0	0		0	0	1	32	1	0	1	0	0	0	1
1	36	6	36.8571	2700	4	38.2857	0	1	0	0	0	0	7562.75		0	0		0	0	1	31	1	0	0	0	0	1	0
0	36	1	36.1429	2120	12	37.8571	0	1	1	0	0	0	21230.4	0	0	0		0	0	0	29	1	1	0	0	1	1	0
1	36	1	36.1429	2580	17	38.5714	0	1	0	0	0	1	44900.2	0	0	0		0	0	0	33	0	0	0	0	1	1	0
1	35	6	35.8571	3250	7	36.8571	0	1	0	0	0	0	12157.4	0	0	0		0	0	0	30	1	0	0	0	0	1	1
1	36	2	36.2857	2870	7	37.2857	0	1	0	0	0	0	12761.4	0	0	0		0	0	0	31	0	0	1	0	0	0	0
1	36	6	36.8571	2170	7	37.8571	1	1	1	0	0	0	13090.2	0	0	0		0	0	1	29	1	0	0	0	0	1	0
1	36	6	36.8571	2460	7	37.8571	1	1	0	0	0	0	12528.8	0	0	0		0	0	1	29	1	0	0	0	0	1	0
1	34	5	34.7143	2470	9	36	0	1	0	0	0	0	14507	0	0	0		0	0	0	31	1	0	0	0	0	0	0
1	36	3	36.4286	2920	6	37.2857	0	1	0	0	0	0	10807.1	0	0	0		0	0	0	38	0	0	0	0	0	1	0
0	35	6	35.8571	1970	9	37.1429	0	1	1	0	0	0	15739.4	0	0	0		0	0	1	34	1	0	0	0	0	0	0
0	35	1	35.1429	2500	7	36.1429	0	1	0	0	0	0	13217.8	0	0	0		0	0	0	33	0	0	0	0	0	1	0
1	36	2	36.2857	2610	7	37.2857	0	1	0	0	0	0	13213.4	0	0	0		0	0	0	33	0	0	1	0	0	0	0
0	34	0	34	2330	11	35.5714	1	1	0	0	0	1	36680.9	0	0	0		0	0	0	29	1	0	0	0	0	1	1
1	34	0	34	2280	11	35.5714	1	1	0	0	0	0	19094.9	0	0	0		0	0	0	29	1	0	0	0	0	1	1
1	35	0	35	2250	15	37.1429	1	1	0	0	0	0	22647.1	0	0	0		0	0	0	29	1	1	0	0	0	1	0
1	35	0	35	2560	14	37	1	1	0	0	0	0	21969.8	0	0	0		0	0	0	29	1	1	0	0	0	1	0
0	35	0	35	2650	17	37.4286	0	1	0	0	0	1	43006.5	0	0	0		0	0	0	34	0	0	0	0	0	1	0
0	34	0	34	2550	15	36.1429	0	1	0	0	0	0	40026.3	0	0	0		0	0	0	34	0	0	0	0	0	1	0
0	35	1	35.1429	1780	20	38	0	1	1	0	0	0	30041.7	0	0	0		0	0	1	25	1	0	0	0	0	1	0
0	34	3	34.4286	2150	13	36.2857	0	1	0	0	0	0	22150.9	0	0	0		0	0	0	33	0	0	1	0	0	1	0
1	26	0	26	750	93	39.2857	0	1	0	0	0	1	218415	0	0	1	0	1	1	0	30	1	0	0	0	0	0	0
1	32	5	32.7143	2230	19	35.4286	0	1	0	0	0	0	35735.9	0	0	0	0	0	0	0	32	1	0	0	0	0	0	0
1	35	3	35.4286	2040	7	36.4286	0	1	0	0	0	0	13437.7	0	0	0		0	0	1	42	0	0	0	0	0	1	0
1	35	6	35.8571	2560	7	36.8571	0	1	0	0	0	0	13189.1	0	0	0		0	0	0	38	0	0	0	0	0	1	0
0	36	4	36.5714	2840	3	37.5714	1	1	0	0	0	0	6379.27	0	0	0		0	0	0	28	1	1	1	1	1	1	0
1	35	1	35.1429	2290	8	36.2857	0	1	0	0	0	0	14007.5	0	0	0		0	0	0	24	1	0	0	0	0	1	0
1	34	6	34.8571	2110	17	37.2857	0	1	0	0	0	0	27704	0	0	0		0	0	1	34	1	0	0	0	0	1	0
1	36	5	36.7143	2930	7	37.7143	0	1	0	0	0	0	13461.5	0	0	0	0	0	0	0	25	1	0	0	0	0	1	0
1	34	5	34.7143	2490	9	36	0	1	0	0	0	0	14577		0	0		0	0	0	34	0	0	1	0	1	1	0
0	34	4	34.5714	2110	11	36.1429	0	1	0	0	0	0	19739.6	0	0	0		0	0	1	31	1	1	0	0	0	1	0
1	35	2	35.2857	2020	9	36.5714	0	1	1	0	0	0	16583.7	0	0	0		0	0	1	27	1	0	0	0	0	1
1	34	0	34	2630	15	36.1429	0	1	0	0	0	0	27931.9	0	0	0		0	0	0	34	1	0	0	0	0	1	0
1	36	6	36.8571	2550	9	38.1429	0	1	0	1	1	0	16436.9	0	0	0		0	0	0	33	0	1	1	0	1	0	0
0	35	0	35	2110	9	36.2857	1	1	0	0	0	0	16457.7	0	0	0		0	0	0	33	1	0	0	0	0	1	0
1	35	0	35	2290	13	36.8571	1	1	0	0	0	0	23717.4	0	0	0		0	0	1	33	1	0	0	0	0	1	0
1	33	2	33.2857	1800	18	35.8571	0	1	0	0	0	0	29625.1	0	0	0		0	0	1	25	1	0	0	0	0	1	0
0	35	0	35	2220	9	36.2857	1	1	0	0	0	0	16134.9	0	0	0		0	0	0	26	0	0	0	1	1	1	0
0	35	0	35	1970	9	36.2857	1	1	0	0	0	0	16617	0	0	0		0	0	1	26	0	0	0	1	1	1	0
0	33	3	33.4286	2170	14	35.4286	1	1	0	0	0	0	22121.5	0	0	0		0	0	0	27	1	0	0	0	0	1	0
0	33	3	33.4286	1950	14	35.4286	1	1	0	0	0	0	21013.9	0	0	0		0	0	0	27	1	0	0	0	0	1	0
0	34	1	34.1429	1940	13	36	1	1	0	0	0	0	38122.1	0	0	0		0	0	0	28	1	0	0	0	0	1	0
1	34	1	34.1429	2270	13	36	1	1	0	0	0	0	18930.6	0	0	0		0	0	0	28	1	0	0	0	0	1	0
0	33	4	33.5714	2270	11	35.1429	0	1	0	0	0	0	17796.4	0	0	0		0	0	0	37	0	0	1	0	0	1	0
0	29	4	29.5714	910	73	40	0	0	0	0	0	1	165052	0	0	1	0	1	0	1	39	1	1	0	0	0	1	0
1	34	1	34.1429	2170	13	36	0	1	0	0	0	0	21540.5	0	0	0		0	0	0	28	1	0	0	0	0	0	1
0	33	6	33.8571	2140	12	35.5714	1	1	0	0	0	0	21135.1	0	0	0		0	0	0	32	1	0	1	0	1	1	0
0	33	6	33.8571	1770	18	36.4286	1	1	0	0	0	0	28914.4	0	0	0		0	0	0	32	1	0	1	0	1	1	0
0	36	2	36.2857	3110	7	37.2857	0	1	0	0	0	0	11504.7	0	0	0		0	0	0	22	0	0	0	0	0	1	0
0	32	6	32.8571	1660	53	40.4286	0	1	0	0	0	0	94792.7	0	0	0	0	1	0	1	32	1	0	0	0	0	1	0
1	35	4	35.5714	2770	11	37.1429	0	1	0	0	0	0	18618.2	0	0	0		0	0	0	35	0	0	0	0	0	1	0
1	36	0	36	2630	11	37.5714	0	1	0	0	0	0	19181.5	0	0	0		0	0	0	32	0	0	0	0	0	0	0
1	34	2	34.2857	2420	11	35.8571	0	1	0	0	0	0	18713.7	0	0	0		0	0	0	39	1	0	0	0	0	0	1
0	36	3	36.4286	2250	9	37.7143	0	1	0	0	0	0	14960.6	0	0	0		0	0	1	31	1	1	0	0	0	1	0
1	36	0	36	2760	6	36.8571	0	1	0	0	0	0	11849	0	0	0		0	0	0	36	0	0	0	0	0	0	1
1	35	0	35	2180	10	36.4286	0	1	0	0	0	0	15984.7	0	0	0		0	0	1	32	1	0	1	0	0	1	0
0	35	0	35	2170	7	36	0	1	0	0	0	0	12796.5	0	0	0		0	0	0	32	1	0	1	0	0	1	0
1	31	5	31.7143	2020	24	35.1429	1	1	0	0	0	1	44180.5	0	0	0	0	0	0	0	38	1	0	0	0	0	1	1
1	31	5	31.7143	1390	45	38.1429	1	1	0	0	0	1	82793.5	0	0	0	0	1	0	1	38	1	0	0	0	0	1	1
0	32	2	32.2857	1530	36	37.4286	0	1	0	0	0	0	42294	0	0	0	0	1	0	0	39	0	0	1	0	0	1	0
0	34	0	34	2800	10	35.4286	0	1	0	0	0	0	14772.5	0	0	0		0	0	0	38	0	0	0	0	0	1	0
0	36	5	36.7143	2800	8	37.8571	0	1	0	0	0	0	14177.8	0	0	0		0	0	0	29	1	0	0	0	0	1	0
0	31	3	31.4286	1220	53	39	0	1	0	0	0	0	93117.9	0	0	0	0	0	0	0	36	0	1	1	0	0	1	0
1	29	6	29.8571	1100	56	37.8571	0	1	0	1	0	0	113543	0	0	0	0	0	0	1	34	0	1	0	0	1	1	0
0	30	6	30.8571	1130	58	39.1429	0	1	0	0	0	0	95411.9	0	0	0	0	0	0	1	40	1	1	0	0	0	1	0
0	29	5	29.7143	1050	59	38.1429	1	1	0	0	0	1	97354.1	0	0	0	0	1	0	1	33	1	1	1	0	0	1	0
1	29	5	29.7143	860	66	39.1429	1	1	1	0	0	1	143276	0	0	0	0	1	1	1	33	1	1	1	0	0	1	0
1	34	5	34.7143	2750	10	36.1429	0	1	0	0	0	0	14217.7	0	0	0		0	0	0	29	0	0	0	0	0	1	0
1	36	3	36.4286	3460	7	37.4286	0	1	0	0	0	0	12623.1	0	0	0		0	0	0	25	1	0	0	0	0	1	0
0	34	2	34.2857	2240	13	36.1429	0	1	0	0	0	0	20143.7	0	0	0		0	0	0	38	1	0	0	0	0	1	1
1	36	5	36.7143	3340	7	37.7143	0	1	0	0	0	0	12363.2	0	0	0		0	0	0	35	0	0	0	0	1	0	0
1	34	4	34.5714	2100	11	36.1429	0	1	0	0	0	0	16736.6	0	0	0		0	0	1	22	1	0	0	0	0	1	0
0	35	2	35.2857	2460	8	36.4286	0	1	0	0	0	0	12818.5	0	0	0		0	0	0	32	0	0	0	0	1	1	0
1	36	1	36.1429	2160	13	38	1	1	0	0	0	0	35598.3	0	0	0		0	0	1	27	1	0	0	0	0	1	0
1	36	1	36.1429	2310	9	37.4286	1	1	0	0	0	0	17090.5	0	0	0		0	0	1	27	1	0	0	0	0	1	0
0	36	5	36.7143	2530	5	38	0	1	0	0	0	0	8627.88	0	0	0		0	0	1	33	0	0	0	0	0	1	0
1	28	0	28	820	90	40.8571	0	1	1	0	0	1	189979	0	0	1	0	1	0	0	36	1	0	0	0	0	1	0
0	34	6	34.8571	1900	12	36.5714	0	1	0	0	0	0	19731.2	0	0	0		0	0	1	27	0	0	0	0	0	0	0
1	35	0	35	2210	8	36.1429	0	1	0	0	0	0	14022.7	1	0	0		0	0	0	31	1	0	1	0	0	0	0
0	35	1	35.1429	1330	33	39.8571	1	1	1	0	0	0	55233.6	0	0	0		0	0	1	33	0	1	0	0	0	1	0
0	35	1	35.1429	2110	27	39	1	1	0	0	0	0	41452.9	0	0	0		0	0	0	33	0	1	0	0	0	1	0
1	35	4	35.5714	2780	5	36.2857	0	1	0	0	0	0	11325		0	0		0	0	0	38	1	0	0	0	1	1
0	31	3	31.4286	1200	47	38.1429	0	1	0	1	0	0	86073.7	0	0	0		0	0	1	32	0	1	0	0	0	1	0
1	34	6	34.8571	2360	8	36	0	1	0	1	0	0	14940.8	0	0	0		0	0	0	29	1	0	0	0	0	1	0
1	36	4	36.5714	2380	8	37.7143	1	1	0	0	0	0	13914.7	0	0	0		0	0	1	39	0	0	0	0	0	1	0
1	36	4	36.5714	2660	6	37.4286	1	1	0	0	0	0	10581.3	0	0	0		0	0	0	39	0	0	0	0	0	1	0
1	32	1	32.1429	1600	26	35.8571	0	1	0	0	0	0	40087.9	0	0	0		0	0	1	29	0	0	0	0	0	0	0
1	36	4	36.5714	2650	4	37.1429	0	1	0	0	0	0	8719.95	0	0	0		0	0	0	28	1	0	0	1	0	1	0
0	34	6	34.8571	2020	10	36.2857	0	1	0	0	0	0	15404.5	0	0	0		0	0	1	30	0	0	0	0	0	1	0
1	36	1	36.1429	2970	10	37.7143	0	1	0	0	0	0	16755.9	0	0	0		0	0	0	32	0	0	0	0	0	1	0
1	36	3	36.4286	2830	7	37.4286	0	1	0	0	0	0	11405.1	0	0	0		0	0	0	31	1	0	0	0	0	0	0
0	35	5	35.7143	2240	10	37.1429	1	1	0	0	0	0	15814.1	0	0	0		0	0	1	35	0	0	0	0	0	1	0
0	35	5	35.7143	2200	10	37.1429	1	1	0	0	0	0	16609.8	0	0	0		0	0	1	35	0	0	0	0	0	1	0
1	35	0	35	2300	14	37	0	1	0	0	0	0	21015.6	0	0	0		0	0	0	31	1	0	1	0	0	1	0
1	36	5	36.7143	2880	8	37.8571	0	1	0	0	0	0	17061	0	0	0		0	0	0	37	0	0	1	0	0	0	1
1	35	1	35.1429	2470	7	36.1429	1	1	0	0	0	0	13161.7	0	0	0		0	0	0	30	0	0	0	0	0	1	0
1	35	1	35.1429	2600	7	36.1429	1	1	0	0	0	0	13256.6	0	0	0		0	0	0	30	0	0	0	0	0	1	0
1	35	4	35.5714	2510	11	37.1429	0	1	0	0	0	0	18844.7	0	0	0		0	0	0	27	1	0	0	0	0	0	0
0	36	0	36	2630	8	37.1429	0	1	0	0	0	0	14453.2	0	0	0		0	0	0	34	0	1	0	0	0	1	0
1	34	3	34.4286	2110	12	36.1429	1	1	0	0	0	0	20873.8	0	0	0		0	0	0	35	1	1	0	0	1	1	0
1	34	3	34.4286	2130	12	36.1429	1	1	0	1	0	1	40903.6	0	0	0		0	0	0	35	1	1	0	0	1	1	0
1	35	6	35.8571	2350	10	37.2857	0	1	0	1	0	0	21139.3	0	0	0		0	0	1	42	0	1	0	0	0	1	0
1	33	5	33.7143	2090	14	35.7143	0	1	0	0	0	0	22959.1	0	0	0		0	0	0	26	1	1	0	1	1	1	0
1	34	6	34.8571	2330	14	36.8571	0	1	0	0	0	1	47632.1	0	0	0		0	0	0	30	0	1	0	0	0	1	1
0	36	6	36.8571	2790	8	38	0	1	0	0	0	0	13994.5	0	0	0		0	0	0	31	0	0	0	1	0	1	0
1	27	6	27.8571	1180	56	35.8571	0	1	0	0	0	1	129436	0	0	0	0	0	0	0	18	0	0	0	0	1	1	1
0	35	1	35.1429	2230	9	36.4286	0	1	0	0	0	0	16978.6	0	0	0		0	0	0	39	1	1	1	0	0	1	0
0	36	1	36.1429	2070	10	37.5714	1	1	1	0	0	0	17939.9	0	0	0		0	0	1	28	1	0	0	0	1	1	0
0	35	4	35.5714	2320	12	37.2857	0	1	0	0	0	0	18276.8	0	0	0		0	0	0	36	0	0	0	0	1	0	0
0	30	3	30.4286	1300	58	38.7143	0	1	0	1	0	1	106410	0	0	0	0	0	0	0	25	1	0	0	0	0	1	0
0	35	4	35.5714	1780	16	37.8571	0	1	1	0	0	0	24196.4	0	0	0	0	0	0	1	35	1	0	0	0	0	1	1
0	35	0	35	2070	9	36.2857	0	1	0	0	0	0	18146.2	0	0	0	0	0	0	1	22	0	0	0	1	1	1	0
0	36	0	36	1820	14	38	0	1	1	0	0	0	20951.8	0	0	0		0	0	1	29	1	0	0	0	0	1	0
0	33	5	33.7143	2040	14	35.7143	1	1	0	0	0	0	22795.6	0	0	0		0	0	0	33	0	0	0	0	1	1	0
0	33	5	33.7143	2100	14	35.7143	1	1	0	0	0	0	21095.9	0	0	0		0	0	0	33	0	0	0	0	1	1	0
0	35	6	35.8571	2950	10	37.2857	0	1	0	1	0	0	18809.2	0	0	0		0	0	0	33	1	0	0	1	1	0	0
0	35	6	35.8571	2510	8	37	0	1	0	0	0	0	13452.5	0	0	0		0	0	0	32	1	0	0	0	0	1	0
1	32	4	32.5714	1680	28	36.5714	1	1	0	0	0	0	60147.8	0	0	0		0	0	0	30	1	0	0	0	1	1	1
1	32	4	32.5714	1900	26	36.2857	1	1	0	0	0	1	56565.5	0	0	0		0	0	0	30	1	0	0	0	1	1	1
0	34	3	34.4286	2350	9	35.7143	0	1	0	0	0	0	16234.5	0	0	0		0	0	0	39	0	0	0	0	1	1	1
0	29	6	29.8571	1050	66	39.2857	0	1	0	0	0	1	132280	0	1	0	0	1	0	1	27	1	1	0	0	1	1	0
1	35	2	35.2857	2700	10	36.7143	0	1	0	0	0	0	17793.8	0	0	0		0	0	0	21	1	0	0	0	0	0	0
0	36	5	36.7143	2960	13	38.5714	0	1	0	0	0	0	21852.4	0	0	0		0	0	0	22	1	0	0	0	1	1	1
0	35	3	35.4286	2820	7	36.4286	0	1	0	0	0	0	15363.8	0	0	0		0	0	0	32	0	0	0	1	1	1	0
0	33	6	33.8571	1820	21	36.8571	0	1	0	0	0	0	34570.9	0	0	0		0	0	1	29	1	0	0	0	0	0	0
1	31	0	31	1700	28	35	0	1	0	0	0	1	62409.5	0	0	0	0	0	0	0	28	1	0	0	0	1	1	0
0	35	3	35.4286	2960	17	38.5714	0	0	0	0	0	0	36220.9	0	0	0		0	0	0	30	0	0	0	0	0	1	1
1	32	0	32	1970	25	35.5714	1	1	0	0	0	1	51693.3	0	0	0	0	0	0	0	27	1	0	0	0	0	1	0
0	36	6	36.8571	3000	5	38	0	1	0	0	0	0	8439.4	0	0	0		0	0	0	29	1	0	0	0	1	1	0
1	36	4	36.5714	2560	7	37.5714	0	1	0	1	0	0	14078.3	0	0	0		0	0	0	32	0	0	1	0	0	1	0
1	31	3	31.4286	1760	29	35.5714	0	1	0	0	0	0	48789.1	0	0	0	0	0	0	0	29	1	0	0	0	0	1	0
1	36	4	36.5714	3370	5	37.2857	0	1	0	0	0	0	8197.15	0	0	0		0	0	0	32	0	0	0	0	0	1	0
1	29	4	29.5714	1470	43	35.7143	0	1	0	1	1	1	97562.4	0	0	0	0	0	0	0	38	1	1	0	0	1	1	0
1	36	3	36.4286	2680	6	37.2857	0	1	0	0	0	0	12244.1	0	0	0		0	0	0	33	0	0	0	0	0	1	0
0	36	4	36.5714	2820	6	38	0	1	0	0	0	0	10968.2	0	0	0		0	0	0	31	1	0	0	0	0	0	0
1	35	5	35.7143	2950	7	36.7143	0	1	0	0	0	0	13506.4	0	0	0		0	0	0	32	0	0	0	0	0	1	0
1	29	0	29	1400	59	37.4286	0	1	0	0	0	1	139927	0	0	1	0	1	0	0	33	1	0	0	0	0	1	0
0	33	4	33.5714	1570	27	37.4286	0	1	0	0	0	0	47449.4	0	0	0		0	0	1	28	1	1	0	0	1	1	0
1	35	6	35.8571	2280	8	37	0	1	0	0	0	0	13396.2	0	0	0		0	0	1	32	0	0	1	0	0	0	0
1	36	3	36.4286	1890	10	37.8571	0	1	1	0	0	0	14556.2	0	0	0		0	0	1	30	1	1	1	0	0	1	0
1	34	4	34.5714	1820	17	37	0	1	0	0	0	0	24874.1	0	0	0		0	0	1	28	0	1	0	0	1	1	0
1	35	4	35.5714	2800	14	37.5714	0	1	0	0	0	0	23071.1	0	0	0		0	0	0	35	1	0	1	0	1	0	0
1	34	0	34	2070	15	36.1429	1	1	0	0	0	1	37198.9	0	0	0	0	0	0	0	27	1	0	0	0	1	1	0
1	34	0	34	1450	28	38	1	1	1	0	0	0	51372.4	0	0	0	0	0	0	1	27	1	0	0	0	1	1	0
0	35	3	35.4286	2330	9	36.7143	0	1	0	0	0	0	14257.6	0	0	0		0	0	0	28	1	0	0	0	0	1	0
1	34	6	34.8571	2310	10	36.2857	0	1	0	0	0	0	15097.3	0	0	0		0	0	0	44	1	0	1	0	0	1	1
1	35	4	35.5714	2970	8	36.7143	0	1	0	0	0	0	14049.8	0	0	0		0	0	0	36	1	0	0	0	0	1	0
1	32	2	32.2857	1250	33	37	0	1	1	0	0	0	58281.6	0	0	0	0	0	0	1	25	0	1	0	0	0	1	0
0	32	4	32.5714	1660	32	37.1429	0	1	0	0	0	0	52686.1	1	0	0	0	0	0	0	30	1	0	0	0	0	1	0
1	34	4	34.5714	2240	8	35.7143	0	1	0	0	0	0	14433.8	0	0	0		0	0	0	31	1	0	0	1	0	0	1
0	36	4	36.5714	2480	7	37.5714	0	1	0	0	0	0	11782.7	0	0	0		0	0	0	25	1	0	0	0	0	1	0
1	35	5	35.7143	2150	13	37.5714	1	1	0	0	0	0	21372.3	0	0	0		0	0	1	31	1	1	0	0	1	0	0
1	35	5	35.7143	1860	17	38.1429	1	1	0	0	0	0	26754.2	0	0	0		0	0	1	31	1	1	0	0	1	0	0
1	35	6	35.8571	2270	8	37	0	1	0	0	0	0	14740.2	0	0	0		0	0	1	33	1	0	1	0	0	0	1
1	36	2	36.2857	2900	5	37	0	1	0	0	0	0	9992.82		0	0		0	0	0	30	1	0	0	0	0	1	0
1	34	5	34.7143	2800	9	36	0	1	0	0	0	0	17190	0	0	0		0	0	0	32	1	0	0	0	0	0	0
0	34	0	34	2700	13	35.8571	0	1	0	0	0	1	32810.6	0	0	0		0	0	0	28	0	0	0	0	0	0	0
0	33	4	33.5714	1870	21	36.5714	0	1	0	0	0	0	28902.6	0	0	0		0	0	0	23	1	1	0	0	0	1	0
1	34	6	34.8571	2070	12	36.5714	0	1	0	0	0	0	19064	0	0	0		0	0	1	27	1	0	0	0	0	0	1
0	33	0	33	1520	27	36.8571	0	1	0	0	0	0	42629.9	0	0	0		0	0	1	33	0	1	0	0	0	1	0
0	35	6	35.8571	2430	7	36.8571	0	1	0	0	0	0	12475.3	0	0	0		0	0	0	29	1	0	0	0	0	0	1
0	36	5	36.7143	4110	6	37.5714	0	1	0	0	0	0	11098.8	0	0	0		0	0	0	34	0	0	1	0	0	1	0
0	34	3	34.4286	1960	11	36	1	1	0	0	0	0	21045.5	0	0	0		0	0	0	37	1	0	0	0	0	1	0
0	34	3	34.4286	1890	11	36	1	1	0	0	0	0	21227.5	0	0	0		0	0	0	37	1	0	0	0	0	1	0
1	32	4	32.5714	1480	37	37.8571	0	1	0	0	0	0	67955.9	0	0	0		0	0	1	35	1	1	1	0	0	1	0
0	27	0	27	990	75	37.7143	0	1	0	1	0	1	158545	1	0	1	0	1	0	0	32	1	0	0	0	0	0	0
0	34	2	34.2857	2170	10	35.7143	0	1	0	0	0	0	16282.8	0	0	0		0	0	0	33	1	0	0	0	0	1	1
1	32	4	32.5714	1750	29	36.7143	1	1	0	0	0	0	45955.4	0	0	0	0	0	0	0	26	0	0	0	0	1	1	0
1	32	4	32.5714	1700	29	36.7143	1	1	0	0	0	0	45165.4	0	0	0	0	0	0	0	26	0	0	0	0	1	1	0
1	34	2	34.2857	2690	12	36	0	1	0	0	0	0	18289.2	0	0	0		0	0	0	29	1	0	1	0	0	0	1
1	32	6	32.8571	2250	16	35.1429	0	1	0	0	0	0	28845.7	0	0	0		0	0	0	31	1	0	1	1	1	1	1
0	33	4	33.5714	2380	14	35.5714	0	1	0	0	0	0	21223	0	0	0		0	0	0	28	1	0	0	0	0	1	0
1	33	2	33.2857	2020	14	35.2857	0	1	0	0	0	0	24045.9	0	0	0		0	0	0	28	1	0	0	1	1	0	0
1	35	2	35.2857	2750	8	36.4286	0	1	0	0	0	0	13845.2	0	0	0		0	0		45	0	0	1	0	1	1	0
0	36	5	36.7143	3320	5	37.4286	0	1	0	0	0	0	9708.42	0	0	0		0	0		36	0	1	0	0	0	1	0
1	33	6	33.8571	2490	13	35.7143	0	1	0	0	0	0	35005.9	0	0	0		0	0	0	31	1	0	1	0	0	1	0
0	35	3	35.4286	2450	8	36.5714	1	1	0	0	0	0	14879.3	0	0	0		0	0	0	32	0	0	0	0	0	1	0
0	35	3	35.4286	2440	8	36.5714	1	1	0	0	0	0	14427.4	0	0	0		0	0	0	32	0	0	0	0	0	1	0
0	29	2	29.2857	930	62	38.1429	0	1	0	1	0	1	126957	0	0	1	0	0	0	1	28	0	1	0	0	1	1	0
1	36	0	36	3670	10	37.4286	0	1	0	0	0	0	18169.6	0	0	0		0	0	0	32	0	0	0	0	1	1	0
0	34	1	34.1429	2270	7	35.1429	0	1	0	0	0	0	14057.4	0	0	0		0	0	0	39	0	0	0	0	0	1	1
0	30	0	30	1330	47	36.7143	0	1	0	0	0	1	101344	0	0	0	0	0	0	0	31	0	0	1	1	1	1	1
1	35	1	35.1429	2090	6	36	0	1	1	0	0	0	12391.5	0	0	0		0	0	1	28	1	0	0	0	0	1	0
1	36	6	36.8571	2960	2	38	0	1	0	0	0	0	3569.18	0	0	0		0	0	0	39	0	0	0	0	0	1	0
0	36	2	36.2857	2620	8	37.4286	0	1	0	0	0	1	27470.6	0	0	0		0	0	0	30	0	0	1	0	1	1	0
0	35	2	35.2857	2970	7	36.2857	0	1	0	0	0	0	11987.2	0	0	0		0	0	0	37	0	1	1	0	0	1	0
1	35	6	35.8571	2620	7	36.8571	1	1	0	0	0	0	13929.2	0	0	0		0	0	0	36	0	1	0	0	0	1	0
1	35	6	35.8571	2650	7	36.8571	1	1	0	0	0	0	14026.4	0	0	0		0	0	0	36	0	1	0	0	0	1	0
1	36	4	36.5714	2970	10	38	0	1	0	0	0	0	19420	0	0	0		0	0	0	25	0	0	0	0	0	1	0
0	32	4	32.5714	1840	34	37.4286	1	1	0	0	0	0	52521.2	0	0	0		0	0	0	28	1	0	0	0	0	1	0
1	32	4	32.5714	2080	21	35.5714	1	1	0	0	0	0	31774.8	0	0	0		0	0	0	28	1	0	0	0	0	1	0
0	36	5	36.7143	2970	7	37.7143	0	1	0	0	0	0	12507.4	0	0	0		0	0	0	31	0	0	0	0	0	1	0
1	34	6	34.8571	2280	20	37.7143	0	1	0	0	0	1	49290.1	0	0	0		0	0	1	42	0	1	1	0	0	1	1
1	35	5	35.7143	2670	7	36.7143	1	1	0	0	0	0	13717.8	0	0	0		0	0	0	35	1	0	0	0	1	1	1
1	35	5	35.7143	2660	11	37.2857	1	1	0	0	0	1	31786.2	0	0	0		0	0	0	35	1	0	0	0	1	1	1
0	27	0	27	990	74	37.5714	0	1	0	0	0	1	170868	0	0	1	0	0	0	0	32	1	0	0	0	1	0	1
1	36	2	36.2857	3200	5	37	0	1	0	0	0	0	9022.96	0	0	0	0	0	0	0	36	0	0	0	0	0	1	0
1	36	0	36	2520	9	37.2857	1	1	0	0	0	0	15299.4	0	0	0	0	0	0	1	30	1	0	0	0	0	1	0
1	28	3	28.4286	1430	66	37.8571	1	1	0	1	0	1	138452	0	0	1	0	0	0	1	23	0	0	0	0	1	1	0
1	28	3	28.4286	860	66	37.8571	1	1	0	0	0	1	134466	0	0	1	0	1	0	1	23	0	0	0	0	1	1	0
0	34	1	34.1429	2380	14	36.1429	0	1	0	1	0	0	23772.6	0	0	0	0	0	0	0	40	0	0	0	0	1	1	0
0	32	2	32.2857	1890	21	35.2857	1	1	0	0	0	0	38105.2	0	0	0		0	0	0	35	1	0	0	0	0	1	0
0	35	2	35.2857	1940	17	37.7143	0	1	1	0	0	0	27386.8	0	0	0		0	0	1	33	1	0	0	0	0	1	0
0	36	3	36.4286	2800	3	37.4286	0	1	0	0	0	0	5631.24	0	0	0		0	0	0	32	1	0	0	0	0	0	0
1	36	0	36	2370	11	37.5714	0	1	0	0	0	0	21973.3	0	0	0		0	0	1	31	1	0	0	0	0	0	1
0	35	3	35.4286	2050	10	36.8571	0	1	0	0	0	0	16190.2	0	0	0		0	0	0	36	1	1	0	0	0	1	0
1	36	4	36.5714	2500	8	37.7143	0	1	0	0	0	0	14911	0	0	0		0	0	0	36	1	0	0	0	0	0	1
1	35	3	35.4286	2280	8	36.5714	0	1	0	0	0	0	14630.1	0	0	0		0	0	1	24	1	0	0	0	0	0	1
1	28	4	28.5714	1410	47	35.2857	1	1	0	0	0	1	100403	0	0	0	0	1	0	0	38	1	0	0	0	0	1	0
1	28	4	28.5714	1330	47	35.2857	1	1	0	0	0	1	114709	0	0	1	0	1	0	0	38	1	0	0	0	0	1	0
1	32	6	32.8571	1940	23	36.1429	1	1	0	0	0	1	51502.4	0	0	0		0	0	0	31	1	0	0	0	1	1	0
1	32	6	32.8571	1910	26	36.5714	1	1	0	0	0	0	49800.3	0	0	0		0	0	1	31	1	0	0	0	1	1	0
0	34	2	34.2857	2530	12	36	0	1	0	0	0	0	21676.3	0	0	0		0	0	0	28	0	0	0	0	0	1	0
0	36	3	36.4286	2510	13	38.2857	0	1	0	0	0	0	20118.5	0	0	0		0	0	0	28	1	0	1	0	1	0	0
1	36	6	36.8571	1850	17	39.2857	0	1	1	0	0	0	20891.7	0	0	0		0	0	1	30	1	1	0	0	0	1	0
0	33	4	33.5714	1870	17	36	0	1	0	0	0	0	24878.6	0	0	0		0	0	0	33	0	1	0	0	0	1	0
1	27	3	27.4286	1070	64	36.5714	0	1	0	0	0	1	140322	0	0	1	0	0	0	0	28	1	0	0	0	1	0	0
1	32	4	32.5714	2020	14	34.5714	0	1	0	0	0	0	23211.5	0	0	0		0	0	0	31	0	0	0	0	1	0	1
1	30	5	30.7143	1840	29	34.8571	0	1	0	0	0	1	54623.6	0	0	0	0	0	0	0	32	0	0	1	0	0	0	0
0	33	3	33.4286	1970	13	35.2857	0	1	0	0	0	0	23363.4	0	0	0		0	0	0	29	0	0	0	0	0	1	1
1	31	6	31.8571	1890	26	35.5714	0	1	0	0	0	0	57487.4	0	0	0	0	0	0	0	34	1	0	0	0	0	0	0
0	35	4	35.5714	2470	3	36	0	1	0	0	0	0	3234.91		0	0		0	0	0	35	1	0	0	0	0	0	0
1	35	0	35	2510	7	36	0	1	0	0	0	0	12518.2	0	0	0		0	0	0	26	0	0	0	0	0	1	0
1	35	0	35	2600	9	36.2857	0	1	0	0	0	0	19993.7	0	0	0		0	0	0	33	0	0	0	0	0	1	0
1	36	5	36.7143	3260	8	38.2857	0	1	0	0	0	0	11094.8	0	0	0		0	0	0	41	0	0	0	0	0	1	0
0	36	5	36.7143	2580	7	37.7143	0	1	0	0	0	0	17735		0	0		0	0	0	27	1	0	0	0	0	0	0
0	28	5	28.7143	1280	49	35.7143	0	1	0	0	0	1	94497.8	0	0	0	0	0	0	0	27	0	0	1	0	1	0	0
1	34	5	34.7143	2720	11	36.2857	0	1	0	1	0	0	21844.2	0	0	0		0	0	0	33	0	0	1	0	1	1	0
1	36	6	36.8571	2520	6	37.7143	0	1	0	0	0	0	12721.8	0	0	0		0	0	1	31	1	1	0	0	0	1	0
1	35	4	35.5714	2260	7	36.5714	0	1	0	0	0	0	13203	0	0	0		0	0	0	30	1	0	0	0	1	0	0
1	34	5	34.7143	2400	10	36.1429	0	1	0	0	0	0	17127.5	0	0	0		0	0	0	26	1	0	0		0	1	0
0	34	1	34.1429	1970	11	35.7143	0	1	0	0	0	0	17587.1	0	0	0		0	0	0	27	1	0	0	0	0	1	0
0	31	4	31.5714	1580	26	35.2857	0	1	0	0	0	1	55961.6	0	0	0		0	0	0	35	0	0	1	0	0	0	0
1	35	0	35	2420	8	36.1429	0	1	0	0	0	0	13537.1	0	0	0		0	0	0	35	0	0	0	1	1	0	0
0	36	1	36.1429	2700	7	37.1429	1	1	0	1	0	0	14508	0	0	0		0	0	0	29	1	0	1	0	0	1	0
1	36	1	36.1429	2290	14	38.1429	1	1	0	1	0	0	23344.5	0	0	0		0	0	1	29	1	0	1	0	0	1	0
0	36	4	36.5714	2080	8	37.7143	0	1	1	0	0	0	16212.6	0	0	0		0	0	1	29	0	0	0	0	0	1	1
1	33	0	33	1960	16	35.2857	0	1	0	0	0	0	24724.6	0	0	0		0	0	0	28	0	0	1	0	0	1	1
0	34	3	34.4286	2480	8	35.5714	0	1	0	0	0	0	16001	0	0	0		0	0	0	35	0	0	0	0	1	0
0	33	4	33.5714	1920	20	36.4286	0	1	0	0	0	0	30284	0	0	0		0	0	0	33	1	0	0	0	0	1	0
0	33	5	33.7143	1280	39	39.2857	0	1	1	0	0	0	62219.9	0	0	0	0	0	0	1	33	1	0	0	0	0	1	0
1	25	2	25.2857	700	103	40	1	1	0			1	239148	0	0	1	0	1	0	1	40	0	0	0	0	1	0	1
1	34	3	34.4286	2150	11	36	0	1	0	0	0	1	34660.8	0	0	0		0	0	0	34	0	0	0	0	0	1	0
0	34	2	34.2857	2040	12	36	0	1	0	0	0	0	25727.4	0	0	0		0	0	0	36	0	0	1	0	0	1	0
0	35	4	35.5714	2250	7	36.5714	0	1	0	0	0	0	11729.4	0	0	0		0	0	0	25	1	0	1	0	0	0	1
0	36	2	36.2857	2500	8	37.4286	0	1	0	0	0	0	13832.9	0	0	0		0	0	0	33	1	0	0	0	0	1	0
1	36	3	36.4286	2120	10	37.8571	0	1	1	0	0	0	15750	0	0	0		0	0	1	29	1	0	0	0	0	1	0
0	32	0	32	1920	33	36.7143	0	1	0	1	0	1	73883.6	0	0	0	0	1	1		26	0	0	0	0	0	1	0
0	35	0	35	2650	11	36.5714	0	1	0	0	0	0	20918.2	0	0	0		0	0	0	33	0	0	0	0	0	1	0
1	33	4	33.5714	2450	11	35.1429	0	1	0	1	1	0	23828.9	0	0	0		0	0		29	1	0	0	1	0	1	0
1	34	0	34	2390	8	35.1429	0	1	0	0	0	0	14093.3	0	0	0		0	0	0	30	1	0	1	0	1	0	1
0	36	1	36.1429	2240	7	37.1429	1	1	0	0	0	0	13796	0	0	0		0	0	1	28	1	0	0	0	0	1	0
1	34	4	34.5714	2100	10	36	0	1	0	0	0	1	29454.9	0	0	0		0	0	1	23	1	0	0	0	0	1	0
1	34	5	34.7143	2190	21	37.7143	0	1	0	0	0	0	34560	0	0	0		1	0	0	31	1	0	0	0	0	1	0
0	33	5	33.7143	2100	13	35.5714	0	1	0	0	0	0	20379.6	0	0	0		0	0	0	32	0	0	0	0	1	0	1
1	33	6	33.8571	2340	12	35.5714	0	1	0	0	0	0	18060.3	0	0	0		0	0	0	29	1	0	0	0	0	0	1
1	36	3	36.4286	2320	8	37.5714	1	1	0	0	0	0	13902.1	0	0	0		0	0	1	38	1	1	0	0	0	1	0
1	34	3	34.4286	2100	15	36.5714	0	1	0	0	0	1	38645	0	0	0		0	0	0	32	1	0	0	0	1	1	0
0	35	3	35.4286	2400	8	36.5714	0	1	0	0	0	0	15195.9	0	0	0		0	0		30	1	0	0	0	0	1	0
0	30	5	30.7143	1350	40	36.4286	0	1	0	0	0	1	82239.2	0	0	0	0	0	0	0	26	1	1	0	0	1	1	0
0	36	5	36.7143	2950	5	37.4286	0	1	0	0	0	0	9850.79	0	0	0		0	0		35	1	0	0	0	0	1	0
1	34	0	34	2430	14	36	0	1	0	0	0	0	25590.8	0	0	0		0	0	0	29	1	0	0	0	1	0	0
1	36	0	36	2040	7	37	1	1	1	0	0	0	11590.8		0	0		0	0	1	32	1	0	0	0	1	1	0
1	35	5	35.7143	2520	7	36.7143	0	1	0	0	0	0	12724	0	0	0	0	0	0	0	31	0	0	1	0	0	1	0
0	35	6	35.8571	2700	6	36.7143	1	1	0	0	0	0	13020.2	0	0	0		0	0	0	27	1	0	0	0	0	1	0
1	35	6	35.8571	2500	6	36.7143	1	1	0	0	0	0	12275.5	0	0	0		0	0	0	27	1	0	0	0	0	1	0
0	36	4	36.5714	2750	9	37.8571	0	1	0	0	0	0	21949	0	0	0		0	0	0	29	0	0	0	0	0	1	0
0	36	2	36.2857	2030	11	37.8571	1	1	1	0	0	0	21042.3	0	0	0		0	0	1	29	0	1	0	0	0	1	0
0	32	0	32	1850	18	34.5714	0	1	0	0	0	0	26849.3	0	0	0		0	0	0	38	0	0	0	0	1	0	1
1	31	2	31.2857	1330	48	38.1429	0	1	0	1	0	1	82537	0	0	0	0	0	0	1	36	1	1	1	0	0	1	0
0	34	4	34.5714	2110	15	36.7143	0	1	0	0	0	0	25433.8	0	0	0		0	0	0	29	1	0	0	0	1	1	0
1	28	5	28.7143	1380	58	37	0	1	0	0	0	1	124204	0	0	0	0	0	0	0	28	1	0	0	0	1	1	1
0	36	0	36	2650	9	37.2857	0	1	0	0	0	0	17121.5	0	0	0		0	0	0	38	0	1	0	0	0	1	0
0	34	5	34.7143	2010	9	36	1	1	0	0	0	0	16913.2	0	0	0		0	0	0	29	1	0	1	0	0	1	0
0	34	5	34.7143	2020	9	36	1	1	0	0	0	0	16921	0	0	0		0	0	1	29	1	0	1	0	0	1	0
1	36	2	36.2857	2660	6	37.5714	1	1	0	0	0	0	11618.7	0	0	0		0	0	0	34	0	0	0	0	0	1	0
1	34	3	34.4286	2530	14	36.4286	0	1	0	0	0	0	23972.5	0	0	0	0	0	0		29	1	0	0	0	0	1	0
0	36	3	36.4286	2780	6	37.2857	0	1	0	0	0	0	11930.3	0	0	0	0	0	0		29	0	0	0	0	0	0	0
1	36	6	36.8571	2930	5	37.5714	0	1	0	0	0	0	9547.5	0	0	0		0	0	0	41	0	0	0	0	0	1	0
0	35	3	35.4286	2700	6	36.2857	0	1	0	0	0	0	11670.8	0	0	0		0	0	0	35	0	1	1	0	0	1	0
1	35	3	35.4286	2230	8	36.5714	0	1	0	0	0	0	14604.7	0	0	0		0	0	0	27	1	0	0	0	0	1	0
0	36	5	36.7143	2740	15	38.8571	0	1	0	0	0	0	21872.7	0	0	0		0	0	0	24	1	0	0	0	0	0	1
1	34	4	34.5714	2500	7	35.5714	0	1	0	0	0	0	14481.5	0	0	0		0	0		26	1	1	0	0	0	1	0
0	34	3	34.4286	1930	16	36.7143	0	1	0	1	0	0	28103.2	0	0	0		0	0	0	27	1	0	0	0	0	1	0
1	36	1	36.1429	1820	15	38.2857	0	1	1	0	0	1	27489.3	0	0	0		0	0	1	35	1	1	0	0	0	1	0
1	34	2	34.2857	2450	10	35.7143	0	1	0	1	0	0	17658.5	0	0	0		0	0	0	27	1	0	0	1	0	1	0
0	36	3	36.4286	2430	7	37.4286	0	1	0	0	0	0	13953.4	0	0	0		0	0	0	39	0	0	0	0	0	1	0
1	30	0	30	1590	32	34.5714	0	1	0	0	0	0	60089.1	0	0	0	0	0	0	0	28	1	0	0	0	1	0	1
1	34	6	34.8571	2540	9	36.1429	0	1	0	0	0	0	17040.8	0	0	0		0	0		34	0	0	0	0	0	1	0
0	35	6	35.8571	2980	6	36.7143	0	1	0	0	0	0	13299.4	0	0	0		0	0	0	35	0	0	0	0	0	1	0
1	35	0	35	2420	14	37	0	1	0	1	0	1	41805	0	0	0		0	0	0	26	0	0	0	0	0	1	0
1	34	6	34.8571	2390	10	36.2857	0	1	0	0	0	1	35337	0	0	0	0	0	0	0	34	0	0	1	0	0	1	0
1	36	4	36.5714	3030	6	37.4286	0	1	0	0	0	0	11771.7	0	0	0		0	0	0	37	0	0	0	0	0	0	0
0	36	2	36.2857	2020	8	37.4286	0	1	1	0	0	0	14706	0	0	0		0	0	1	31	1	0	0	0	0	0	1
1	30	6	30.8571	1800	33	35.5714	0	1	0	0	0	0	63598.2	0	0	0	0	0	0	0	39	1	0	0	0	0	1	0
1	29	0	29	1040	68	38.7143	0	1	0	0	0	1	140985	0	0	1	0	0	0	1	36	0	1	1	0	1	0	0
1	36	1	36.1429	2820	6	37	0	1	0	0	0	0	12250.9	0	0	0		0	0	0	27	1	0	0	0	0	1	0
1	32	4	32.5714	1740	20	35.4286	0	1	0	0	0	0	35385.7	0	0	0	0	0	0	0	34	0	0	0	0	0	1	0
1	34	4	34.5714	2010	12	36.2857	1	1	0	0	0	0	19435.6	1	0	0		0	0	0	30	0	1	0	0	0	1	0
1	34	4	34.5714	1740	12	36.2857	1	1	1	0	0	0	19188.6	0	0	0		0	0	1	30	0	1	0	0	0	1	0
1	36	2	36.2857	2790	6	37.2857	0	1	0	0	0	0	9411.94	0	0	0		0	0		32	0	0	1	1	0	0	0
1	34	2	34.2857	2680	14	36.2857	1	1	0	0	0	1	38322.3	0	0	0		0	0	0	36	0	0	0	0	1	1	0
1	34	2	34.2857	2400	18	36.8571	1	1	0	0	0	1	44223.4	0	0	0		0	0	0	36	0	0	0	0	1	1	0
1	34	3	34.4286	2370	19	37.1429	0	1	0	0	0	0	35927.8	0	0	0	0	0	0	0	35	1	0	0	0	0	0	1
1	35	5	35.7143	2050	10	37.1429	0	1	0	0	0	0	17922.5	0	0	0		0	0	1	31	0	0	1	0	0	1	0
0	36	5	36.7143	2540	8	38.2857	0	1	0	0	0	0	13471	0	0	0		0	0	1	28	1	1	0	0	0	1	0
1	31	1	31.1429	1250	46	37.7143	0	1	0	0	0	1	91862.1	0	0	0	0	1	0	1	25	1	1	0	0	0	1	0
1	30	5	30.7143	1860	37	36	1	1	0	0	0	1	74433.6	0	0	0	0	0	0	0	40	0	0	1	0	1	1	0
0	35	5	35.7143	2470	8	36.8571	0	1	0	0	0	0	13162.7	0	0	0		0	0	0	25	1	0	0	0	0	1	0
1	36	2	36.2857	2220	7	37.4286	0	1	1	0	0	0	10989.6	0	0	0		0	0	1	33	0	0	0	0	0	0	0
0	34	1	34.1429	1950	10	35.5714	0	1	0	0	0	0	20049.7	0	0	0		0	0		31	0	0	0	0	1	0	1
1	28	1	28.1429	1250	75	38.8571	0	1	0	0	0	1	178195	0	0	1	0	1	1	0	24	0	0	0	0	0	0	0
1	34	5	34.7143	2560	7	35.7143	0	1	0	0	0	0	13479.1	0	0	0		0	0	0	33	1	0	1	0	0	1	0
1	34	0	34	1770	15	36.1429	0	1	1	0	0	0	23009.7	0	0	0		0	0	1	32	1	0	0	0	0	1	0
1	36	1	36.1429	2300	14	38.1429	1	1	0	0	0	0	19658.9	0	0	0		0	0	0	30	1	0	1	0	0	1	0
1	36	1	36.1429	2470	8	37.2857	1	1	0	0	0	0	13443.8	0	0	0		0	0	0	30	1	0	1	0	0	1	0
0	34	1	34.1429	1760	16	36.4286	0	1	0	0	0	0	28546.3	0	0	0		0	0	1	29	0	1	0	0	1	1	0
0	33	5	33.7143	2270	13	35.5714	0	1	0	0	0	0	19767	0	0	0		0	0	0	30	0	0	1	0	1	1	0
0	35	1	35.1429	2360	8	36.2857	1	1	0	0	0	0	12294.5	0	0	0		0	0	0	27	1	0	0	0	1	1	0
0	35	1	35.1429	2240	8	36.2857	1	1	0	0	0	0	12576.6	0	0	0		0	0	0	27	1	0	0	0	1	1	0
0	34	0	34	2250	9	35.2857	0	1	0	0	0	0	14232.4	0	0	0		0	0	0	34	1	0	0	0	0	0	0
0	32	0	32	1930	21	35	0	1	0	0	0	0	31434.2	0	0	0		0	0	0	28	0	0	0	1	0	1	1
1	34	0	34	1930	15	36.1429	0	1	0	0	0	0	29179.8	0	0	0		0	0	0	33	1	0	0	0	1	1	0
1	35	1	35.1429	2660	7	36.1429	1	1	0	0	0	0	13007.1	0	0	0		0	0	0	31	1	0	0	0	1	1	1
0	35	1	35.1429	2380	7	36.1429	1	1	0	0	0	0	13542.3	0	0	0		0	0		31	1	0	0	0	1	1	1
1	36	6	36.8571	3460	9	38.1429	0	1	0	0	0	0	16161.6	0	0	0		0	0	0	30	1	0	0	0	0	1	0
0	36	3	36.4286	1850	8	37.5714	0	1	1	0	0	0	14004.8	0	0	0		0	0	1	31	1	1	0	0	0	1	0
1	36	1	36.1429	3140	6	37	0	1	0	0	0	0	10841.1	0	0	0		0	0	0	41	0	0	0	0	0	1	0
0	36	0	36	2820	6	36.8571	0	1	0	0	0	0	10410.9	0	0	0		0	0	0	23	0	0	1	0	0	1	0
0	35	3	35.4286	2760	7	36.4286	0	1	0	0	0	0	13879.9	0	0	0		0	0	0	38	0	0	0	0	0	1	0
1	34	5	34.7143	2090	11	36.2857	0	1	0	0	0	0	18713.3	0	0	0		0	0	0	27	1	1	0	0	0	1	0
1	35	4	35.5714	2320	12	37.2857	1	1	0	1	0	1	43993.3	0	0	0		0	0	1	31	1	0	0	0	0	1	0
0	36	4	36.5714	2550	6	37.4286	1	1	0	0	0	0	10837.1	0	0	0		0	0		30	1	0	1	0	0	1	0
0	36	4	36.5714	2230	6	37.4286	1	1	0	0	0	0	12040.6	0	0	0		0	0		30	1	0	1	0	0	1	0
0	32	0	32	1800	20	34.8571	0	1	0	0	0	0	28076.8	0	0	0		0	0		38	0	1	0	0	1	1	0
1	36	4	36.5714	2640	6	37.4286	1	1	0	0	0	0	10931.5	0	0	0		0	0	0	23	1	0	0	1	1	1	0
0	36	4	36.5714	2230	6	37.4286	1	1	0	0	0	0	11286.6	0	0	0		0	0	1	23	1	0	0	1	1	1	0
0	30	3	30.4286	1500	45	36.8571	0	1	0	0	0	1	108478	0	0	1	0	0	0	0	37	1	1	0	0	0	1	0
1	32	1	32.1429	1840	33	36.8571	0	1	0	0	0	1	67174.5	0	0	0	0	0	0	0	35	0	0	0	0	1	1	0
1	33	3	33.4286	2000	17	35.8571	0	1	0	0	0	0	28994.2	0	0	0		0	0	0	32	1	0	0	0	1	1	1
1	36	3	36.4286	2520	5	37.1429	0	1	0	0	0	0	10964.6	0	0	0		0	0	0	31	0	0	0	0	0	1	1
1	29	0	29	1320	42	35	0	1	0	0	0	1	93176.6	0	0	1	0	0	0	0	25	1	0	0	0	1	1	1
0	36	2	36.2857	2480	6	37.1429	0	1	0	0	0	0	15041.7	0	0	0		0	0	0	35	0	0	0	0	0	0	1
0	36	1	36.1429	2720	7	37.1429	1	1	0	0	0	0	14167.9	0	0	0		0	0		37	0	0	1	0	1	1	0
[truncated: 888 more rows]
